# Supplementary material for: Transcriptional co-expression and co-regulation of genes coding for components of the oxidative phosphorylation system
Source: Springer Nature journal article supplement (doi:10.1186/1471-2164-9-18), 2008-01-01
Supplement: 12864_2007_1212_MOESM4_ESM.pdf [file 12864_2007_1212_MOESM4_ESM.pdf]

This Supplementary Material shows the Core Promoters of Complex I subunits/related genes identified by phylogenetic footprinting. The conserved regions are shown in color codes, which correspond to specific Transcription Factor Binding Sites (TFBS).

The description of the complete description of TFBS can be found in Supplementary Table S1 (in the “Matrix Family Library” Excell sheet).

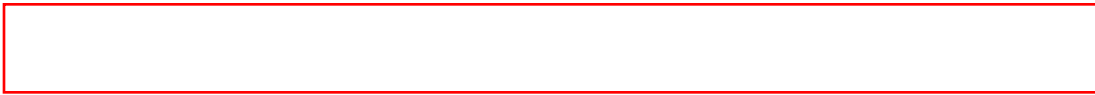

[Genomatix-Logo](#)      [License Agreement](#)      [Your Comments](#)      [Personal](#)      [GEMS-Logo](#)

[Genomatix Main](#) [GEMSEI](#) [Dorado](#) [Gene2Promoter](#) [BiblioSphere](#)  
[Frequently asked questions](#) [Your Results](#) [Your Sequences](#) [Your Protocol](#) [Help](#)

**GEMS Launcher Task: *DiAlign TF*: Multiple alignment plus TF sites  
 working on NDUFA1\_HMR.seq (3 seq.)**

[\[Alignment\]](#) [\[Pairwise similarities\]](#)

DiAlign professional TF Release 3.1 December 2004

Mon Mar 14 20:25:14 2005

### Solution parameters:

**Sequence file:** [NDUFA1\\_HMR.seq](#) (3 seq.)  
**Type of sequences:** nucleotide sequences  
**Threshold T:** 0.00  
**'\*' signs below alignment denote:** diagonal similarity (max. similarity is represented by 10 '\*' signs)  
**Alignment output:** complete alignment is shown  
 # nucleic acids per line: 50  
**TF output:** common TF matches located in aligned regions (common to 3 (100.0 %) sequences)  
**Family matches:** yes  
**MatInspector library:** Matrix Family Library Version 5.0 (February 2005)  
 • ALL user\_defined.lib (0.75/Optimized)  
 • ALL vertebrates.lib (0.75/Optimized)  
**Selected groups**  
 (core/matrix sim):

### Aligned Sequences:

| No. | Sequence Name | Sequence Description                                                                                                                                                                                                                          | Length |
|-----|---------------|-----------------------------------------------------------------------------------------------------------------------------------------------------------------------------------------------------------------------------------------------|--------|
| 1   | P914042       | P914042 sym=NDUFA1 loc=Loc4694 taxid=9606 spec=Homo sapiens chr=X ctg=NT_011786 str=(+) start=3272907 end=3273632 len=726 tss=538 comm=NADH dehydrogenase (ubiquinone) 1 alpha subcomplex, 1, 7.5kDa; (NM_004541/538/bronze:)                 | 726 bp |
| 2   | P914043       | P914043 sym=Ndufa1 loc=Loc54405 taxid=10090 spec=Mus musculus chr=X ctg=NT_039702 str=(-) start=4319612 end=4320330 len=719 tss=599,619 comm=NADH dehydrogenase (ubiquinone) 1 alpha subcomplex, 1; (AK007840/619/gold;NM_019443/599/bronze:) | 719 bp |
| 3   | P914044       | P914044 sym=nalloc=Loc363441 taxid=10116 spec=Rattus norvegicus chr=X ctg=NW_048033 str=(+) start=100444 end=101164 len=721 tss=501 comm=similar to NADH dehydrogenase; (XM_343760/501/bronze:)                                               | 721 bp |

### Alignment (DiAlign format):

Please note that only **upper-case** letters are considered to be **aligned**. For more information, please have a look at the user guide.

[V\\$VMYB](#) [V\\$SMAD](#) [V\\$FKHD](#) [V\\$EBOX](#) [V\\$HESF](#) [V\\$MYT1](#) [V\\$PAX2](#) [V\\$ZBPF](#) [V\\$SPIF](#) [V\\$GLIF](#) [V\\$EGRF](#)  
[V\\$SHAML](#)

```
alignment position 1 . . . . . 11 . . . . . 21 . . . . . 31 . . . . . 41 . . . . .
P914042      1 t c t - - T T C T C T G T G T C C A G C T C A T A G A C A G C T G T C G C T C C C A T A T C C T C
P914043      1 - - - - - T C T C A G T G T C C A G T T C G T A G A C G G C G G T C G C C C C C A T A T C C T C
P914044      1 c g t t c c T T C T C A G T G T C C A G T T C A T A G A C A G C G G T C G C C C C C A T A T C t T C
```







|                            |  |                             |
|----------------------------|--|-----------------------------|
| <b>P914043</b><br>(719 bp) |  | <b>1.000</b><br><u>83 %</u> |
|----------------------------|--|-----------------------------|

Please note that the **similarity value 1.000** marks only the two **most similar** sequences, it does not necessarily mean that these sequences are identical.

| Extract alignment region         |                                                     |
|----------------------------------|-----------------------------------------------------|
| <b>Positions in alignment</b>    | from: <input type="text"/> to: <input type="text"/> |
| <b>Output file</b>               | <input type="text" value="dialign.seq"/>            |
| <b>Extract aligned sequences</b> |                                                     |

For questions or bug reports, please contact [support@genomatix.de](mailto:support@genomatix.de)

[Genomatix-Logo](#)      [Personal](#) / [Personal](#)      [Password](#) / [Password](#)      [Messages](#) / [Messages](#)      [Logout](#) / [Logout](#)      [GEMS-Logo](#)

---

[Genomatix Portal](#) [GEMSEI](#) [Dorado](#) [Gene2Promoter](#) [MatBase](#)  
[Frequently asked questions](#) [Your Results](#) [Your Sequences](#) [Your Protocol](#) [Help](#)

---

**GEMS Launcher Task: *DiAlign TF*: Multiple alignment plus TF sites working on ndufa2 (3 seq.)**

---

[\[Alignment\]](#) | [\[Pairwise similarities\]](#)

---

**DiAlign professional TF Release 3.1.1 September 2005** **Fri Oct 20 20:30:09 2006**

---

**Solution parameters:**

**Sequence file:** [ndufa2](#) (3 seq.)  
**Type of sequences:** nucleotide sequences  
**Threshold T:** 0.00  
 '\*' signs below alignment denote: diagonal similarity (max. similarity is represented by 10 '\*' signs)  
**Alignment output:** complete alignment is shown  
 # nucleic acids per line: 50  
**TF output:** common TF matches located in aligned regions (common to 3 (100.0 %) sequences)  
**Family matches:** yes  
**MatInspector library:** Matrix Family Library Version 6.1 (June 2006)  
**Selected groups** (core/matrix sim)
 

- ALL user\_defined.lib (0.75/Optimized)
- ALL vertebrates.lib (0.75/Optimized)

---

**Aligned Sequences:**

| No. | Sequence Name | Sequence Description                                                                                                                                                                                                                                                                                                                       | Length |
|-----|---------------|--------------------------------------------------------------------------------------------------------------------------------------------------------------------------------------------------------------------------------------------------------------------------------------------------------------------------------------------|--------|
| 1   | GXP_123839    | GXP_123839 loc=GXL_103357 sym=NDUFA2 geneid=4695 acc=GXP_123839 taxid=9606 spec=Homo sapiens chr=5 ctg=NC_000005 str=(-) start=140006924 end=140007924 len=1001 tss=501 descr=NADH dehydrogenase (ubiquinone) 1 alpha subcomplex, 2, 8kDa comm=GXT_2834145/NM_002488/871/bronze                                                            | 1001   |
| 2   | GXP_83080     | GXP_83080 loc=GXL_69065 sym=Ndufa2 geneid=17991 acc=GXP_83080 taxid=10090 spec=Mus musculus chr=18 ctg=NC_000084 str=(-) start=36869998 end=36871022 len=1025 tss=501,525 descr=NADH dehydrogenase (ubiquinone) 1 alpha subcomplex, 2 comm=GXT_13006391/AK018732/570/gold;GXT_13017074/AK003608/546/gold;GXT_13131667/NM_010885/546/bronze | 1025   |
| 3   | GXP_309531    | GXP_309531 loc=GXL_260322 sym=Ndufa2_predicted geneid=291660 acc=GXP_309531 taxid=10116 spec=Rattus norvegicus chr=18 ctg=NC_005117 str=(-) start=29443334 end=29444334 len=1001 tss=501 descr=NADH dehydrogenase (ubiquinone) 1 alpha subcomplex, 2 (predicted) comm=GXT_21781541/XM_214570/566/bronze                                    | 1001   |

**Alignment (DiAlign format):**

Please note that only **upper-case** letters are considered to be **aligned**. For more information, please have a look at the user guide.

V\$GATA V\$STAF V\$ZBPF V\$SPIF V\$YY1F V\$PARF V\$ZNF V\$CLOX V\$HEAT TSS

```

alignment position      1 . . . . . 1 1 . . . . . 2 1 . . . . . 3 1 . . . . . 4 1 . . . . .
GXP_123839 (NDUFA2)    1 g c c c a t c a t c a c t t g g a g t a g g - - - - - A G T G A G G A C T G G G
GXP_83080 (Ndufa2)    1 a a c c a c g t c c c t a a a a g a g a g g c a c a a g c c a t g g t t t A C T A A G G A A G G G A
GXP_309531
(Ndufa2_predicted)    1 - - - - -
                                     * * * * *
alignment position      5 1 . . . . . 6 1 . . . . . 7 1 . . . . . 8 1 . . . . . 9 1 . . . . .
GXP_123839 (NDUFA2)    36 G A C G G A G T T T G g a g c t g - - - - -
GXP_83080 (Ndufa2)    51 T A G G G A G G T A G A G C T G C c t c a a a a a T T C A A A A C G C C G G T C C T C C A C A A A
GXP_309531
(Ndufa2_predicted)    1 - - - - G A G G T G G G G C T G C - - - - - T T C A A A A C G C C G G T C C T C A A C A A A
    
```

```

*****
alignment position
GXP_123839 (NDUFA2)      1 0 1 . . . . . 1 1 1 . . . . . 1 2 1 . . . . . 1 3 1 . . . . . 1 4 1 . . . . .
GXP_83080 (Ndufa2)      53 - - - - - TCG GCCTCACTTA GGACCCTGTG
GXP_309531 (Ndufa2_predicted)
101 a GAAATGAAA CTTGAGGGCA GCTCAGCTGG GCCTCTCCTA AGGACCAATG
38 - GAAACAAAA TTTGAGGGCA GTTCAGCAGG GCCTCTCCTA AAGGCCAATG
*****
alignment position
GXP_123839 (NDUFA2)      1 5 1 . . . . . 1 6 1 . . . . . 1 7 1 . . . . . 1 8 1 . . . . . 1 9 1 . . . . .
GXP_83080 (Ndufa2)      76 GCTTCTCCGG GCTCAAgcggt cacacataca tacatacaca cacacacaca
GXP_309531 (Ndufa2_predicted)
151 GTTCGCGCGG CTCCTCA- - - - -
87 GTTCGCGCGC CTCCTCA- - - - -
*****
alignment position
GXP_123839 (NDUFA2)      2 0 1 . . . . . 2 1 1 . . . . . 2 2 1 . . . . . 2 3 1 . . . . . 2 4 1 . . . . .
GXP_83080 (Ndufa2)      126 c a c a c a c a c a c ACACACACA C - - ACCCGG CTTAAGCTCA GAAGctaca
GXP_309531 (Ndufa2_predicted)
166 - - - - - TCAGTCACA CgacACCTTG CTTAAATTCA GCAAACCTCGA
102 - - - - - ACAGTCACA C - - AACTGG CTTAAATTCA GCAAACCTCAA
*****
alignment position
GXP_123839 (NDUFA2)      2 5 1 . . . . . 2 6 1 . . . . . 2 7 1 . . . . . 2 8 1 . . . . . 2 9 1 . . . . .
GXP_83080 (Ndufa2)      173 t a a t GCGCCA AGTGCCCAA GTGCCATGGG GAAGAAATAA CGGatggcct
205 C - - GAGCCT AGCTCTCTA GTCCC GCGGG CAGGAAAGAG TGGTc GACTC
GXP_309531 (Ndufa2_predicted)
138 C - - AAGCCT AGTGTCTCTA GTCCC GCGGG CAAGAAAGAG TGGTt GACTC
*****
alignment position
GXP_123839 (NDUFA2)      3 0 1 . . . . . 3 1 1 . . . . . 3 2 1 . . . . . 3 3 1 . . . . . 3 4 1 . . . . .
GXP_83080 (Ndufa2)      223 GAGCCTTACT ATCTCGTCC GGCATTTTgt t atcgttett t egctgtcaC
GXP_309531 (Ndufa2_predicted)
252 GAGCCTTACT ATCTCGTCT GGCATTTTGG CAGCGGCCTC TCAACG- - T
185 TAGCCTTACT ATCTCGTCC GGCATTTcGG CCGCGGTCTC TCAGCG- - C
*****
alignment position
GXP_123839 (NDUFA2)      3 5 1 . . . . . 3 6 1 . . . . . 3 7 1 . . . . . 3 8 1 . . . . . 3 9 1 . . . . .
GXP_83080 (Ndufa2)      273 CAACAATCGa g t c t c c a a - - CAG- CAACA CCGCAGCGAC AAGCTCTTTC
GXP_309531 (Ndufa2_predicted)
299 CCGCAATCGC GAAATGTCCc c c t a a CAAGA CAGCGGCGAC AAACCTTTTAT
232 CAGCAATCGC GAAATATCCt CAA- - CAAAA CAGCGGCGAC AAACCTTTTAT
*****
alignment position
GXP_123839 (NDUFA2)      4 0 1 . . . . . 4 1 1 . . . . . 4 2 1 . . . . . 4 3 1 . . . . . 4 4 1 . . . . .
GXP_83080 (Ndufa2)      319 CCACAGTGCA Cctcagaa t c a a c CCACACT GCTTTGCGTT CGCAGCCTTT
GXP_309531 (Ndufa2_predicted)
280 CCACAATGCA CCA CGAAA a c t g t - - - - -
280 CCACAATGCA CCA CGAAA g c t g CGACAGA GCTTTGCCTT CCGTGCCCTC

```









For [comments](#), questions, or bug reports, please contact [support@genomatix.de](mailto:support@genomatix.de).

© Genomatix Software GmbH 1998-2006 - All rights reserved.

GEMS Launcher 4.3.0

[License Agreement](#)

[Genomatix-Logo](#)
[Personal](#)
[Password](#)
[Messages](#)
[Logout](#)
[GEMS-Logo](#)

[Genomatix Portal](#)
[GEMSEI](#)
[Dorado](#)
[Gene2Promoter](#)
[MatBase](#)  
[Frequently asked questions](#)
[Your Results](#)
[Your Sequences](#)
[Your Protocol](#)
[Help](#)

**GEMS Launcher Task: *DiAlign TF*: Multiple alignment plus TF sites working on CVW-ndufa3 (3 seq.)**

[\[Alignment\]](#)
[\[Pairwise similarities\]](#)

**DiAlign professional TF Release 3.1.1 September 2005**
**Fri Oct 20 20:31:45 2006**

### Solution parameters:

**Sequence file:** [CVW-ndufa3](#) (3 seq.)  
**Type of sequences:** nucleotide sequences  
**Threshold T:** 0.00  
**'\*' signs below alignment denote:** diagonal similarity (max. similarity is represented by 10 '\*' signs) complete alignment is shown  
**Alignment output:** # nucleic acids per line: 50  
**TF output:** common TF matches located in aligned regions (common to 3 (100.0 %) sequences)  
**Family matches:** yes  
**MatInspector library:** Matrix Family Library Version 6.1 (June 2006)  
**Selected groups** (core/matrix sim)
 

- ALL user\_defined.lib (0.75/Optimized)
- ALL vertebrates.lib (0.75/Optimized)

### Aligned Sequences:

| No. | Sequence Name | Sequence Description                                                                                                                                                                                                                             | Length     |
|-----|---------------|--------------------------------------------------------------------------------------------------------------------------------------------------------------------------------------------------------------------------------------------------|------------|
| 1   | P914067       | P914067 sym=NDUFA3 loc=Loc4696 taxid=9606 spec=Homo sapiens chr=19 ctg=NT_011109 str=(+) start=26873850 end=26874850 len=1001 tss=501 comm=NADH dehydrogenase (ubiquinone) 1 alpha subcomplex, 3, 9kDa; (NM_004542/501/bronze;)                  | 1001<br>bp |
| 2   | mNDUFA3       | mNDUFA3 m6_dna range=chr7_random:9785301-9786471 5'pad=0 3'pad=0 revComp=FALSE strand=? repeatMasking=none                                                                                                                                       | 1171<br>bp |
| 3   | P914068       | P914068 sym=nalloc=Loc361494 taxid=10116 spec=Rattus norvegicus chr=1 ctg=NW_047555 str=(-) start=9304776 end=9305776 len=1001 tss=501 comm=similar to NADH-ubiquinone oxidoreductase B9 subunit (Complex I-B9) (CI-B9); (XM_341773/501/bronze;) | 1001<br>bp |

### Alignment (DiAlign format):

Please note that only **upper-case** letters are considered to be **aligned**. For more information, please have a look at the user guide.

[VSSTAT](#)
[V\\$BRNF](#)
[V\\$ZBPF](#)
[V\\$YYIF](#)
[V\\$NKXH](#)
[V\\$EKL](#)
[V\\$RARE](#)
[V\\$RORA](#)
[V\\$MZF1](#)
[TSS](#)

```

alignment position      1 . . . . . 1 1 . . . . . 2 1 . . . . . 3 1 . . . . . 4 1 . . . . .
P914067 (NDUFA3)      1 a g a g c c - - - - -
mNDUFA3            1 t t a a t g - - - - - C C C T G T C T C A A A A T A A A A A G T A A T G A A A G G G C T G A
P914068 (na)       1 a g a t a c t t a a t g a g a C C C T A T C T C A A A A T A A A A A G C A A T G A A A G G G T T G A
                    
```

```

*****
*****
*****
alignment
position      5 1 . . . . . 6 1 . . . . . 7 1 . . . . . 8 1 . . . . . 9 1 . . . . .
P914067
(NDUFA3)      7 - - - - -
mNDUFA3      42 A A A A T G T G G C T C A A C A A T A A A A G A T A T G C C T A A A A T C C A C C A G C a g g g a c
P914068
(na)          51 C A A A T G T G G C T C A A C A A T A C A A A A T A T G C C T A G A A T C C A C C A G C c g g a g c
*****
*****
*****
alignment
position      1 0 1 . . . . . 1 1 1 . . . . . 1 2 1 . . . . . 1 3 1 . . . . . 1 4 1 . . . . .
P914067
(NDUFA3)      7 - - - - -
mNDUFA3      92 c t g g g a t a g t a G A A T C T A T C A C C A A G T G G A C G G A G G A G T G G C T C A A T C g g
P914068
(na)          101 c t g g g t c a t g - G A A T C T A C C A G C A A G T G G A C C G A G G A G T G C C T C A G T C a t
*****
*****
*****
alignment
position      1 5 1 . . . . . 1 6 1 . . . . . 1 7 1 . . . . . 1 8 1 . . . . . 1 9 1 . . . . .
P914067
(NDUFA3)      7 - - - - -
mNDUFA3      142 A G A T G G G T A G C C T A g c c t g T C C T G G T T T C A G T T T T C A G C A C T A A G G G G C A
P914068
(na)          150 A G A T G G G T A G C C T A - - - T C C T G G T T T C A A T C T G C A A C A C T G A G G G G C A
*****
*****
*****
alignment
position      2 0 1 . . . . . 2 1 1 . . . . . 2 2 1 . . . . . 2 3 1 . . . . . 2 4 1 . . . . .
P914067
(NDUFA3)      7 - - - - -
mNDUFA3      192 G A T G G A G G g A A A A G C C A T G A T C T G C A T G C T A G T A A C A C A A A G C A C A G G C A
P914068
(na)          195 G A G G G T G G a A A A A C C A T G A G C C G C A T G C T A G T A A C A T A A A G C A C A G A C T
*****
*****
*****
alignment
position      2 5 1 . . . . . 2 6 1 . . . . . 2 7 1 . . . . . 2 8 1 . . . . . 2 9 1 . . . . .
P914067
(NDUFA3)      15 G C T C C T A A C C C A T C T G G G A T G A g a c c T A G C G C T T C C A G G A C G A G C C G A T G
mNDUFA3      242 G T C C T T A A T A T A T T T G G G A T T A A T T - T A G A A T T T C C A G A A T G A G C T T A T G
P914068
(na)          245 G T T C T T A A T C T A T T T G G G A T C A A T T - T A G A A T T T C T G G A A T G A G T T C A T G
*****
*****
*****
alignment
position      3 0 1 . . . . . 3 1 1 . . . . . 3 2 1 . . . . . 3 3 1 . . . . . 3 4 1 . . . . .
P914067
(NDUFA3)      65 T T G A G C T G A G A C C T C G A a - - - - -
mNDUFA3      291 T C T A G A T G T G A T C T C A A T G T A A A G C T G A C T T T T T t t t t t a a g g t t t a t
P914068
(na)          294 T C T A G A C G C G A C C T C A A T G T A A T G A G G A C T T T C T T g c a g a a g a t c t t g a a

```



**P914068 (na)** 408 C A A G G T G G T T T A A T T C T T T C t g g C C T C C T A A G C - - - - -

\*\*\*\*\*  
\*\*\*\*\*  
\*\*\*\*\*

alignment position 7 0 1 . . . . . 7 1 1 . . . . . 7 2 1 . . . . . 7 3 1 . . . . . 7 4 1 . . . . .

**P914067 (NDUFA3)** 299 t t a c c t c c a c g g c t c c a t c t t t g t t c t g c g c g a g t g c g c a c g c g c a g g c t

**mNDUFA3** 609 - - - - -

**P914068 (na)** 441 - - - - -

alignment position 7 5 1 . . . . . 7 6 1 . . . . . 7 7 1 . . . . . 7 8 1 . . . . . 7 9 1 . . . . .

**P914067 (NDUFA3)** 349 c c g a a a g c g g g c c g t C G C A C A G A G G G A C C A C A A C T C C C A G A G T G C T C C G C

**mNDUFA3** 609 - - - - - C T C A C T C C A G A A C T A C A A C T C C C G A A A G G G T C C A C

**P914068 (na)** 441 - - - - - C T C A C T C T A G A A C T A C A A C T C C C G A A A G G C T T C A C

\*\*\*\*\*  
\*\*\*\*\*  
\*\*\*\*\*  
\*\*\*\*\*

alignment position 8 0 1 . . . . . 8 1 1 . . . . . 8 2 1 . . . . . 8 3 1 . . . . . 8 4 1 . . . . .

**P914067 (NDUFA3)** 399 G T C C T T G C t t t c g c c t c t a c t t g t g c t c c a g g g c g c a c g c g c a g c C C T G G

**mNDUFA3** 644 G T C C T C G C - - - - - C C A A G

**P914068 (na)** 476 G T C C T T G C - - - - - C C A A G

\*\*\*\*\*  
\*\*\*\*\*  
\*\*\*\*\*  
\*\*\*\*\*

alignment position 8 5 1 . . . . . 8 6 1 . . . . . 8 7 1 . . . . . 8 8 1 . . . . . 8 9 1 . . . . .

**P914067 (NDUFA3)** 449 G A G C G G G T T C T C G C G C A t a g - - - - G G A C C A C A A C T C C C A G G G T G C T C C G C

**mNDUFA3** 657 G G G C G G G G C C T C A C G C A A G G A G A A G G A C C A C A A C T C C C A G A G A G C T C C G C

**P914068 (na)** 489 G G G C G G G G C C T C A T G C A A G G A A A A G A A C C A C A A C T C C C A G A G A G C T C C c t

\*\*\*\*\*  
\*\*\*\*\*  
\*\*\*\*\*  
\*\*\*\*\*

alignment position 9 0 1 . . . . . 9 1 1 . . . . . 9 2 1 . . . . . 9 3 1 . . . . . 9 4 1 . . . . .

**P914067 (NDUFA3)** 495 g t c c t c g c c g c t g t c g c C G C C G C G G A G A C A A A G A T G G C T G C G A G T A A G T G

**mNDUFA3** 707 t c c t t g t - - - - - C G C C G C C A A G A A C A A A G A T G G C C G G G A G T A A G T A

**P914068 (na)** 539 g c t c t t g t - - - - - C C A A G A C C A A A G A T G G C T G C T A G T A A G T A

\*\*\*\*\*  
\*\*\*\*\*  
\*\*\*\*\*  
\*\*\*\*\*









[Genomatix-Logo](#)
[Personal](#)  
[Personal](#)
[Password](#)  
[Password](#)
[Messages](#)  
[Messages](#)
[Logout](#)  
[Logout](#)
[GEMS-Logo](#)

[Genomatix Portal](#) [GEMSEI](#) [Dorado](#) [Gene2Promoter](#) [MatBase](#)  
[Frequently asked questions](#) [Your Results](#) [Your Sequences](#) [Your Protocol](#) [Help](#)

**GEMS Launcher Task: *DiAlign TF*: Multiple alignment plus TF sites working on C1-NDUFA4 (3 seq.)**

[\[Alignment\]](#) [\[Pairwise similarities\]](#)

**DiAlign professional TF Release 3.1.1 September 2005**

**Fri Oct 20 20:35:27 2006**

### Solution parameters:

**Sequence file:** [C1-NDUFA4](#) (3 seq.)  
**Type of sequences:** nucleotide sequences  
**Threshold T:** 0.00  
**'\*' signs below alignment denote:** diagonal similarity (max. similarity is represented by 10 '\*' signs) complete alignment is shown  
**Alignment output:** # nucleic acids per line: 50  
**TF output:** common TF matches located in aligned regions (common to 3 (100.0 %) sequences)  
**Family matches:** yes  
**MatInspector library:** Matrix Family Library Version 6.1 (June 2006)  
**Selected groups** (core/matrix sim)
 

- ALL user\_defined.lib (0.75/Optimized)
- ALL vertebrates.lib (0.75/Optimized)

### Aligned Sequences:

| No. | Sequence Name | Sequence Description                                                                                                                                                                                                                                                                       |
|-----|---------------|--------------------------------------------------------------------------------------------------------------------------------------------------------------------------------------------------------------------------------------------------------------------------------------------|
| 1   | P876208       | P876208 sym=NDUFA4 loc=Loc4697 taxid=9606 spec=Homo sapiens chr=7 ctg=NT_007819 str=(-) start=10274926 end=10275986 len=1061 tss=501,552,561 comm=NADH dehydrogenase (ubiquinone) 1 alpha subcomplex, 4, 9kDa; (AK024837/552/gold;AK130950/561/gold;NM_002489/501/silver;)                 |
| 2   | P876209       | P876209 sym=Ndufa4 loc=Loc17992 taxid=10090 spec=Mus musculus chr=6 ctg=NT_039340 str=(-) start=8662756 end=8663771 len=1016 tss=501,505,514,516 comm=NADH dehydrogenase (ubiquinone) 1 alpha subcomplex, 4; (AK005084/533/gold;AK008357/546/gold;AK008506/548/gold;NM_010886/537/silver;) |
| 3   | rNDUFA4       | rNDUFA4 n3_dna range=chr4:37251038-37252042 5'pad=0 3'pad=0 revComp=TRUE strand=? repeatMasking=none                                                                                                                                                                                       |

### Alignment (DiAlign format):

Please note that only **upper-case** letters are considered to be **aligned**. For more information, please have a look at the user guide.

V\$P53F
V\$ZF5F
V\$AHR
V\$HESF
V\$CLOX
V\$SETSF
V\$DMTF
V\$XBBF
V\$E2FF
V\$NRSF
V\$HEAT
TSS

```

alignment position      1 . . . . . 1 1 . . . . . 2 1 . . . . . 3 1 . . . . . 4 1 . . . . .
P876208 (NDUFA4)      1 c g t a a c a c a g g a a g c a g c t g c a g t c t t c t c a a a c c g c a g C C G C T G A C C T T
P876209 (Ndufa4)      1 - - - - - - - - - - - - - - - - - - - - - - - - - - - - - - - - - C C G T T G A C C C C
                    
```











```

** ** ** ** ** ** ** ** ** ** ** ** ** ** ** ** ** ** ** ** ** ** ** ** ** ** ** ** ** ** ** ** ** ** ** ** ** ** ** ** ** ** ** ** ** ** ** ** ** ** ** ** ** ** ** **
** ** ** ** ** ** ** ** ** ** ** ** ** ** ** ** ** ** ** ** ** ** ** ** ** ** ** ** ** ** ** ** ** ** ** ** ** ** ** ** ** ** ** ** ** ** ** **
alignment
position      1 1 0 1 . . . . . 1 1 1 1 . . . . . 1 1 2 1 . . . . . 1 1 3 1 . . . . .
P876208
(NDUFA4)      1062 - - - - - - - - - - - - - - - - - - - - - - - - - - - - - - - - - - - - -
P876209
(Ndufa4)      980 GTGCAAGGGa - - - TCGTCAT CGTGTAATCC CCACTTTGCT
rNDUFA4       966 ATACAAGGGg t c g TCGTCAT CTTGTAATCA TAACTTTGCT
** ** ** ** ** ** ** ** ** ** ** ** ** ** ** ** ** ** ** ** ** ** ** ** ** ** ** ** ** ** ** ** ** ** ** ** ** ** ** **
** ** ** ** ** ** ** ** ** ** ** ** ** ** ** ** ** ** ** ** ** ** ** ** ** ** ** ** ** ** ** ** ** ** ** ** ** **

```

**Pairwise similarities:**

For each pairwise alignment, the **similarity** (relative to the maximum similarity) and the **number of identical nucleic acids** (in % of shorter sequence) is given. Maximum values are underlined.

|                                    | <b>P876209</b><br><b>(1016 bp)</b> | <b>rNDUFA4</b><br><b>(1005 bp)</b> |
|------------------------------------|------------------------------------|------------------------------------|
| <b>P876208</b><br><b>(1061 bp)</b> | 0.238<br>38 %                      | 0.262<br>40 %                      |
| <b>P876209</b><br><b>(1016 bp)</b> |                                    | <u>1.000</u><br><u>85 %</u>        |

Please note that the **similarity value 1.000** marks only the two **most similar** sequences, it does not necessarily mean that these sequences are identical.

| Extract Alignment Region      |                                                     |
|-------------------------------|-----------------------------------------------------|
| <b>Positions in alignment</b> | from: <input type="text"/> to: <input type="text"/> |
| <b>Output file</b>            | <input type="text" value="dialign.seq"/>            |

Extract Aligned Sequences

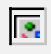

For [comments](#), questions, or bug reports, please contact [support@genomatix.de](mailto:support@genomatix.de).

[Logout](#)      [Personal](#)      [Messages](#)  
[Logout](#)      [Personal](#)      [Messages](#)

[Genomatix-Logo](#)      [GEMS-Logo](#)

---

[Genomatix Main](#) [GEMSEI](#) [Dorado](#) [Gene2Promoter](#) [BiblioSphere](#)  
[Frequently asked questions](#) [Your Results](#) [Your Sequences](#) [Your Protocol](#) [Help](#)

---

**GEMS Launcher Task: *DiAlign TF*: Multiple alignment plus TF sites working on promoters.seq (3 seq.)**

[\[Alignment\]](#)   [\[Pairwise similarities\]](#)

---

DiAlign professional TF Release 3.1 December 2004
Mon Jun 6 23:08:24 2005

---

### Solution parameters:

**Sequence file:** [promoters.seq](#) (3 seq.)  
**Type of sequences:** nucleotide sequences  
**Threshold T:** 0.00  
**'\*' signs below alignment denote:** diagonal similarity (max. similarity is represented by 10 '\*' signs)  
**Alignment output:** complete alignment is shown  
# nucleic acids per line: 50  
**TF output:** common TF matches located in aligned regions (common to 3 (100.0 %) sequences)  
**Family matches:** yes  
**MatInspector library:** Matrix Family Library Version 5.0 (February 2005)

- ALL user\_defined.lib (0.75/Optimized)
- ALL vertebrates.lib (0.75/Optimized)

**Selected groups**  
(core/matrix sim):

---

### Aligned Sequences:

| No. | Sequence Name | Sequence Description                                                                                                                                                                                                                                                                                                                                                                                                                                                                                                                                                                                                                                                                                                                                                                                                                                                                                                | Length     |
|-----|---------------|---------------------------------------------------------------------------------------------------------------------------------------------------------------------------------------------------------------------------------------------------------------------------------------------------------------------------------------------------------------------------------------------------------------------------------------------------------------------------------------------------------------------------------------------------------------------------------------------------------------------------------------------------------------------------------------------------------------------------------------------------------------------------------------------------------------------------------------------------------------------------------------------------------------------|------------|
| 1   | P921898       | sym=NDUFA5 loc=Loc4698 taxid=9606 spec=Homo sapiens chr=7 <br>ctg=NT_007933 str=(-) start=4838093 lend=48382034 len=1104  tss=501,604  comm=NADH<br>dehydrogenase (ubiquinone) 1 alpha subcomplex, 5, 13kDa;<br>(AK022209/645/gold;NM_005000/542/bronze;)                                                                                                                                                                                                                                                                                                                                                                                                                                                                                                                                                                                                                                                           | 1104<br>bp |
| 2   | P921899       | sym=Ndufa5 loc=Loc68202 taxid=10090 spec=Mus musculus chr=6 <br>ctg=NT_039340 str=(-) start=21360789 lend=21361930 len=1142 <br>tss=501,522,608,609,618,620,629,632,633,636,641,642  comm=NADH dehydrogenase (ubiquinone) 1<br>alpha subcomplex, 5; (AK011579/642/gold;AK019201/632/gold;AK008155/632/gold;<br>AK008414/636/gold;AK011947/642/gold;AK008156/636/gold;<br>AK009985/618/gold;AK019207/641/gold;AK019215/632/gold;<br>AK010090/632/gold;AK019242/633/gold;AK010092/618/gold;<br>AK019324/522/gold;AK019430/620/gold;AK009338/618/gold;<br>AK008286/636/gold;AK019245/620/gold;AK009461/632/gold;<br>AK019084/632/gold;AK009608/632/gold;AK009642/620/gold;<br>AK019354/629/gold;AK019364/618/gold;AK019291/632/gold;<br>AK009652/632/gold;AK009840/618/gold;AK019359/609/gold;<br>AK009493/632/gold;AK009396/632/gold;AK019368/620/gold;<br>AK010024/632/gold;AK009775/608/gold;NM_026614/501/bronze;) | 1142<br>bp |
| 3   | P921900       | sym=Ndufa5 loc=Loc25488 taxid=10116 spec=Rattus norvegicus <br>chr=4 ctg=NW_047689 str=(-) start=21329033 lend=21330033  len=1001 tss=501  comm=NADH<br>dehydrogenase (ubiquinone) 1 alpha subcomplex 5; (NM_012985/508/bronze;)                                                                                                                                                                                                                                                                                                                                                                                                                                                                                                                                                                                                                                                                                    | 1001<br>bp |

---

### Alignment (DiAlign format):

Please note that only **upper-case** letters are considered to be **aligned**. For more information, please have a look at the user guide.

V\$NRFI V\$NRFI V\$SPIF V\$SHOXC V\$SRORA V\$FKHD V\$NFIE

```

alignment position 1 . . . . . 1 1 . . . . . 2 1 . . . . . 3 1 . . . . . 4 1 . . . . .
P921898      1 g a g g - - - - -
P921899      1 c a a g a a c a C AT GC AT CT TT TAT AA AGCCA TGA TTC CAC A TT CT AGA ACA
P921900      1 - - - - - C AT GC AT CT TT TAT AA AGCCA TGA TTC CAC A TT CT AGA ACA
                * * * * *
                * * * * *
                * * * * *
                * * * * *
                * * * * *
                * * * * *
                * * * * *

```

```

alignment position 5 1 . . . . . 6 1 . . . . . 7 1 . . . . . 8 1 . . . . . 9 1 . . . . .
P921898      5 - - - - -
P921899     51 CACTC AAC AA TG AC AGAT GT TCT TG GGAT C TGG Ag g GAC A GAG AAC A GGG
P921900     42 CACTT AAC AA TG AC AGAT GT TCT TA GGACC TGG Aa a GAC G GAG AAT A GAG
                * * * * *
                * * * * *
                * * * * *
                * * * * *

```

```

alignment position 10 1 . . . . . 1 1 1 . . . . . 1 2 1 . . . . . 1 3 1 . . . . . 1 4 1 . . . . .
P921898      5 - - - - - - - - - - - - - - - T AG GAAAA AGT GGT AT GG T C T GAT AT CA
P921899    101 ACT AT GAC CT CA TAA ACA CC CAc TG GAACA AAG ACT ACG A CT T CATA ACC
P921900    92 ACT AT GAC CT CA TAA ACT CC CAT TG GAACA AAG ACT ATGA CT T CATA ACC
                * * * * *
                * * * * *
                * * * * *
                * * * * *
                * * * * *
                * * * * *
                * * * * *

```

```

alignment position 15 1 . . . . . 1 6 1 . . . . . 1 7 1 . . . . . 1 8 1 . . . . . 1 9 1 . . . . .
P921898     33 TTTCA Tc t g g a a a - - - - -
P921899    151 TTTCA TTC At CAG T C TCC TC AAG AG AAAAC GGA TGC AT C A GAT GGT T AAT
P921900    142 TTTCA TTC Ac CA GC C TCC AC AGG AG CAAAC GGA TAT AT C A GAT GGT T AAT
                * * * * *
                * * * * *
                * * * * *
                * * * * *
                * * * * *

```

```

alignment position 20 1 . . . . . 2 1 1 . . . . . 2 2 1 . . . . . 2 3 1 . . . . . 2 4 1 . . . . .
P921898     46 - - - - - TAA GATGATG TAT TTC AGC C AG TGA AAT CG
P921899    201 TCCAC TTT AT AAT TT CCA CT TAT GAGTATG CAT TCACAC A c - GTGGAGGG
P921900    192 TCCAC TTT AT AG TTC CCA TT TAT GAATATG TAT TCACGC A AGGGG GAGAG
                * * * * *
                * * * * *
                * * * * *

```

```

alignment position 25 1 . . . . . 2 6 1 . . . . . 2 7 1 . . . . . 2 8 1 . . . . . 2 9 1 . . . . .
P921898     76 Aa a ag agc ga t g gaa aat ga cct c a c act c cat ag g gct t t g g t t c g t a a
P921899    250 AAAGC ATT CT TC ATGGTG CT C- - - - -
P921900    242 AGCAT TTT TT TC ATGATG CT C- - - - -
                * * * * *

```

```

alignment position 30 1 . . . . . 3 1 1 . . . . . 3 2 1 . . . . . 3 3 1 . . . . . 3 4 1 . . . . .
P921898    126 g a c a c a g a g a a t a c t g a t a t c c t t g t g c g a a g a a c t a a c t t g c t g t t g a g
P921899    271 - - - - -
P921900    263 - - - - -

```







```

P921900 1002 -----
alignment position 1351 . . . . . 1361 . . . . . 1371 . . . . . 1381 . . . . . 1391 . . . . .
P921898 1105 -----
P921899 1076 g c c g t g a c c t c t t a a t t a a g a c g c g t t t c t t c a c g g c a t t c t c t t a g c g t
P921900 1002 -----

alignment position 1401 . . . . . 1411 . . .
P921898 1105 -----
P921899 1126 c a g t g g t g t g g a g t a t t
P921900 1002 -----
    
```

### Pairwise similarities:

For each pairwise alignment, the [similarity](#) (relative to the maximum similarity) and the [number of identical nucleic acids](#) (in % of shorter sequence) is given. Maximum values are underlined.

|                                    | <b>P921899</b><br><b>(1142 bp)</b> | <b>P921900</b><br><b>(1001 bp)</b> |
|------------------------------------|------------------------------------|------------------------------------|
| <b>P921898</b><br><b>(1104 bp)</b> | 0.158<br>31 %                      | 0.177<br>35 %                      |
| <b>P921899</b><br><b>(1142 bp)</b> |                                    | <u>1.000</u><br><u>77 %</u>        |

Please note that the **similarity value 1.000** marks only the two **most similar** sequences, it does not necessarily mean that these sequences are identical.

| Extract alignment region  |                                                     |
|---------------------------|-----------------------------------------------------|
| Positions in alignment    | from: <input type="text"/> to: <input type="text"/> |
| Output file               | <input type="text" value="dialign.seq"/>            |
| Extract aligned sequences |                                                     |

For [comments](#), questions or bug reports, please contact [support@genomatix.de](mailto:support@genomatix.de)

[Genomatix-Logo](#)      [Logout](#)      [Personal](#)      [Messages](#)      [GEMS-Logo](#)  
[Logout](#)      [Personal](#)      [Messages](#)  


---

[Genomatix Main](#) [GEMSEI](#) [Dorado](#) [Gene2Promoter](#) [BiblioSphere](#)  
[Frequently asked questions](#) [Your Results](#) [Your Sequences](#) [Your Protocol](#) [Help](#)  


---

**GEMS Launcher Task: *DiAlign TF*: Multiple alignment plus TF sites working on promoters.seq (3 seq.)**  


---

[\[Alignment\]](#) [\[Pairwise similarities\]](#)

DiAlign professional TF Release 3.1 December 2004

Mon Jun 6 23:21:05 2005

### Solution parameters:

**Sequence file:** [promoters.seq](#) (3 seq.)  
**Type of sequences:** nucleotide sequences  
**Threshold T:** 0.00  
**'\*' signs below alignment denote:** diagonal similarity (max. similarity is represented by 10 '\*' signs)  
**Alignment output:** complete alignment is shown  
# nucleic acids per line: 50  
**TF output:** common TF matches located in aligned regions (common to 3 (100.0 %) sequences)  
**Family matches:** yes  
**MatInspector library:** Matrix Family Library Version 5.0 (February 2005)  

- ALL user\_defined.lib (0.75/Optimized)
- ALL vertebrates.lib (0.75/Optimized)

**Selected groups**  
(core/matrix sim):

### Aligned Sequences:

| No. | Sequence Name | Sequence Description                                                                                                                                                                                                                                                                                                   | Length     |
|-----|---------------|------------------------------------------------------------------------------------------------------------------------------------------------------------------------------------------------------------------------------------------------------------------------------------------------------------------------|------------|
| 1   | P855595       | sym=NDUFA6 loc=Loc4700 taxid=9606 spec=Homo sapiens chr=22 <br>ctg=NT_011520 str=(-) start=21876764 end=21877764 len=1001  tss=501  comm=NADH<br>dehydrogenase (ubiquinone) 1 alpha subcomplex, 6, 14kDa; (NM_002490/577/bronze;)                                                                                      | 1001<br>bp |
| 2   | P855596       | sym=Ndufa6 loc=Loc67130 taxid=10090 spec=Mus musculus <br>chr=15 ctg=NT_039621 str=(-) start=43832732 end=43833737  len=1006 tss=501,506  comm=NADH<br>dehydrogenase (ubiquinone) 1 alpha subcomplex, 6 (B14);<br>(AK002749/558/gold; AK010988/558/gold; AK012328/558/gold; NM_025987/553/bronze;)                     | 1006<br>bp |
| 3   | P855597       | sym=nalloc loc=Loc315167 taxid=10116 spec=Rattus norvegicus <br>chr=7 ctg=NW_047781 str=(-) start=1179476 end=1180476  len=1001 tss=501  comm=similar to<br>NADH dehydrogenase (ubiquinone) 1 alpha subcomplex, 6 (B14); NADH dehydrogenase (ubiquinone)<br>1 alpha subcomplex, 6 (14kD, B14); (XM_235518/597/bronze;) | 1001<br>bp |

### Alignment (DiAlign format):

Please note that only **upper-case** letters are considered to be **aligned**. For more information, please have a look at the user guide.

V\$NRF1 U\$NRF1 V\$ECAT V\$PCAT V\$YYIF V\$NEUR V\$PLAG V\$HICF V\$E2TF V\$NFKB V\$SRORA  
U\$T3R U\$T3Rbis V\$E4FF V\$STAT V\$SETSF

alignment position      1 . . . . . 1 1 . . . . . 2 1 . . . . . 3 1 . . . . . 4 1 . . . . .  
**P855595**      1 a - - - - -  
**P855596**      1 t c - - - - -





|                    |     |                                |                     |             |
|--------------------|-----|--------------------------------|---------------------|-------------|
| <b>P855597</b>     | 301 | CTCGACGCTGCGCTCCCTGGTGGTTCTTCA | GCGCCGCGGT          | CGAAGGAG--  |
|                    |     | *****                          | *****               | *****       |
|                    |     | *****                          | *****               | *****       |
|                    |     | *****                          | *****               | *****       |
| alignment position |     | 501.....                       | 511.....            | 521.....    |
| <b>P855595</b>     | 115 | actaccaggagcgcggcgggcagccggat  | agcaggacgc          | tgagggaaca  |
| <b>P855596</b>     | 339 | -----                          | -----               | -----       |
| <b>P855597</b>     | 349 | -----                          | -----               | -----       |
| alignment position |     | 551.....                       | 561.....            | 571.....    |
| <b>P855595</b>     | 165 | cccgcagtcgcctcggcgtcc          | ccggcgcagc          | ctcaccgacc  |
| <b>P855596</b>     | 339 | -----                          | -----               | -----       |
| <b>P855597</b>     | 349 | -----                          | -----               | -----       |
| alignment position |     | 601.....                       | 611.....            | 621.....    |
| <b>P855595</b>     | 215 | tgcggcccgagcgtccctggcggcaacg   | cggctcgtta          | gagcgaagcga |
| <b>P855596</b>     | 339 | -----                          | -----               | -----       |
| <b>P855597</b>     | 349 | -----                          | -----               | -----       |
| alignment position |     | 651.....                       | 661.....            | 671.....    |
| <b>P855595</b>     | 265 | cagatgggtgtagtCCAAGG           | CCAAGCGGCG          | TTTCTGTAGA  |
| <b>P855596</b>     | 339 | -----                          | CCAACCc             | cggATCGGTG  |
| <b>P855597</b>     | 349 | -----                          | CCAACCA             | CCAATCGGTG  |
|                    |     |                                | *****               | *****       |
|                    |     |                                | *****               | *****       |
|                    |     |                                | *****               | *****       |
|                    |     |                                | *****               | *****       |
|                    |     |                                | *****               | *****       |
| alignment position |     | 701.....                       | 711.....            | 721.....    |
| <b>P855595</b>     | 315 | CAGcaccac                      | cggtcgcctca         | gccagagaga  |
| <b>P855596</b>     | 376 | CATTGCAGAG                     | CCGgagcctt          | -----       |
| <b>P855597</b>     | 386 | CATGGCAGAG                     | C <b>CCg</b> t----- | -----       |
|                    |     | *****                          | *****               | *****       |
|                    |     | *****                          | *****               | *****       |
|                    |     | *****                          | *****               | *****       |
|                    |     | *****                          | *****               | *****       |
|                    |     | *****                          | *****               | *****       |
| alignment position |     | 751.....                       | 761.....            | 771.....    |
| <b>P855595</b>     | 365 | AGCCTCAGa                      | gtcatcctccc         | gcccaaccag  |
| <b>P855596</b>     | 410 | AGCCCTAGT                      | Ceagtcagtc          | ttccctcTGC  |
| <b>P855597</b>     | 411 | AGCCCCAGT                      | Ca-----             | -----TCC    |
|                    |     | *****                          | *****               | *****       |
|                    |     | *****                          | *****               | *****       |
| alignment position |     | 801.....                       | 811.....            | 821.....    |
| <b>P855595</b>     | 412 | cctccttagc                     | caatgggaaa          | agacattcgc  |
| <b>P855596</b>     | 460 | GAGTCCCGT                      | gacacgCGCG          | T-----      |
| <b>P855597</b>     | 446 | GCGTCC TGT                     | aacgctaCGCG         | T-----      |
|                    |     | *****                          | *****               | *****       |
|                    |     | *****                          | *****               | *****       |
| alignment position |     | 851.....                       | 861.....            | 871.....    |
| <b>P855595</b>     | 462 | ttgcaaaagg                     | gtggggttgt          | GGAGTGGATG  |
| <b>P855596</b>     | 492 | AGG-----                       | -----               | GGC         |





## Pairwise similarities:

For each pairwise alignment, the **similarity** (relative to the maximum similarity) and the **number of identical nucleic acids** (in % of shorter sequence) is given. Maximum values are underlined.

|                             | <b>P855596</b><br>(1006 bp) | <b>P855597</b><br>(1001 bp) |
|-----------------------------|-----------------------------|-----------------------------|
| <b>P855595</b><br>(1001 bp) | 0.298<br>32 %               | 0.277<br>34 %               |
| <b>P855596</b><br>(1006 bp) |                             | <u>1.000</u><br><u>71 %</u> |

Please note that the **similarity value 1.000** marks only the two **most similar** sequences, it does not necessarily mean that these sequences are identical.

| Extract alignment region  |                                                     |
|---------------------------|-----------------------------------------------------|
| Positions in alignment    | from: <input type="text"/> to: <input type="text"/> |
| Output file               | <input type="text" value="dialign.seq"/>            |
| Extract aligned sequences |                                                     |

For [comments](#), questions or bug reports, please contact [support@genomatix.de](mailto:support@genomatix.de)













| Extract alignment region  |                                                     |
|---------------------------|-----------------------------------------------------|
| Positions in alignment    | from: <input type="text"/> to: <input type="text"/> |
| Output file               | <input type="text" value="dialign.seq"/>            |
| Extract aligned sequences |                                                     |

For [comments](#), questions or bug reports, please contact [support@genomatix.de](mailto:support@genomatix.de)

© Genomatix Software GmbH 1998-2005  
- All rights reserved.

[License Agreement](#)

GEMS Launcher 4.1.1

[Genomatix-Logo](#)      [Logout](#)      [Personal](#)      [Messages](#)      [GEMS-Logo](#)  
[Logout](#)      [Personal](#)      [Messages](#)  


---

[Genomatix Main](#) [GEMSEI](#) [Dorado](#) [Gene2](#) [Promoter](#) [BiblioSphere](#)  
[Frequently asked questions](#) [Your Results](#) [Your Sequences](#) [Your Protocol](#) [Help](#)  


---

**GEMS Launcher Task: *DiAlign TF*: Multiple alignment plus TF sites working on promoters.seq (3 seq.)**  


---

[\[Alignment\]](#) [\[Pairwise similarities\]](#)

DiAlign professional TF Release 3.1 December 2004

Tue Jun 7 00:08:43 2005

### Solution parameters:

**Sequence file:** [promoters.seq](#) (3 seq.)  
**Type of sequences:** nucleotide sequences  
**Threshold T:** 0.00  
**\*! signs below alignment denote:** diagonal similarity (max. similarity is represented by 10 '!\*' signs)  
**Alignment output:** complete alignment is shown  
# nucleic acids per line: 50  
**TF output:** common TF matches located in aligned regions (common to 3 (100.0 %) sequences)  
**Family matches:** yes  
**MatInspector library:** Matrix Family Library Version 5.0 (February 2005)  

- ALL user\_defined.lib (0.75/Optimized)
- ALL vertebrates.lib (0.75/Optimized)

**Selected groups**  
(core/matrix sim):

### Aligned Sequences:

| No. | Sequence Name | Sequence Description                                                                                                                                                                                                                 | Length  |
|-----|---------------|--------------------------------------------------------------------------------------------------------------------------------------------------------------------------------------------------------------------------------------|---------|
| 1   | P884734       | sym=NDUFA8 loc=Loc4702 taxid=9606 spec=Homo sapiens chr=9 ctg=NT_008470 str=(-) start=32242802 end=32243802 len=1001 tss=501 comm=NADH dehydrogenase (ubiquinone) 1 alpha subcomplex, 8, 19kDa; (NM_014222/501/silver;)              | 1001 bp |
| 2   | P884735       | sym=Ndufa8 loc=Loc68375 taxid=10090 spec=Mus musculus chr=2 ctg=NT_039206 str=(-) start=13477407 end=13478407 len=1001 tss=501 comm=NADH dehydrogenase (ubiquinone) 1 alpha subcomplex, 8; (AK002744/590/gold;NM_026703/590/bronze;) | 1001 bp |
| 3   | P884736       | sym=nal loc=Loc296658 taxid=10116 spec=Rattus norvegicus chr=3 ctg=NW_047653 str=(-) start=1194484 end=1195484 len=1001 tss=501 comm=similar to Aa2-258; (XM_216044/581/bronze;)                                                     | 1001 bp |

### Alignment (DiAlign format):

Please note that only **upper-case** letters are considered to be **aligned**. For more information, please have a look at the user guide.

[V\\$SORV](#) [V\\$BRNF](#) [V\\$SPIF](#) [V\\$ZBPF](#) [V\\$NRF1](#) [V\\$NRF2](#) [V\\$MINI](#) [V\\$GATA](#)

```

alignment position 1 . . . . . 1 1 . . . . . 2 1 . . . . . 3 1 . . . . . 4 1 . . . . .
P884734      1 t a c a t c t c c a a c t g g a t t a t a a a c t c c a t a a g a g c a a g g a t c t t g a c a t t
P884735      1 c g c g c t c g - - - - - T - - - - -
P884736      1 g g g a t a c a c g c g c t c a t a c g g a t a c a c a c a T - - - - -
                                                    *
                                                    *
                                                    *

```











[Genomatix-Logo](#)      [Logout](#)      [Personal](#)      [Messages](#)      [GEMS-Logo](#)  
[Logout](#)      [Personal](#)      [Messages](#)  


---

[Genomatix Main](#) [GEMSEI](#) [Dorado](#) [Gene2](#) [Promoter](#) [BiblioSphere](#)  
[Frequently asked questions](#) [Your Results](#) [Your Sequences](#) [Your Protocol](#) [Help](#)  


---

**GEMS Launcher Task: *DiAlign TF*: Multiple alignment plus TF sites working on promoters.seq (3 seq.)**  


---

[\[Alignment\]](#) [\[Pairwise similarities\]](#)  


---

**DiAlign professional TF Release 3.1 December 2004** **Tue Jun 7 00:50:41 2005**

**Solution parameters:**

**Sequence file:** [promoters.seq](#) (3 seq.)  
**Type of sequences:** nucleotide sequences  
**Threshold T:** 0.00  
**\*! signs below alignment denote:** diagonal similarity (max. similarity is represented by 10 '! signs)  
**Alignment output:** complete alignment is shown  
# nucleic acids per line: 50  
**TF output:** common TF matches located in aligned regions (common to 3 (100.0 %) sequences)  
**Family matches:** yes  
**MatInspector library:** Matrix Family Library Version 5.0 (February 2005)  

- ALL user\_defined.lib (0.75/Optimized)
- ALL vertebrates.lib (0.75/Optimized)

**Selected groups** (core/matrix sim):

**Aligned Sequences:**

| No. | Sequence Name | Sequence Description                                                                                                                                                                                                                | Length  |
|-----|---------------|-------------------------------------------------------------------------------------------------------------------------------------------------------------------------------------------------------------------------------------|---------|
| 1   | P921928       | sym=NDUFA9 loc=Loc4704 taxid=9606 spec=Homo sapiens chr=12 ctg=NT_009759 str=(+) start=4612044 end=4613044 len=1001 tss=501 comm=NADH dehydrogenase (ubiquinone) 1 alpha subcomplex, 9, 39kDa; (NM_005002/503/bronze;)              | 1001 bp |
| 2   | P921929       | sym=Ndufa9 loc=Loc66108 taxid=10090 spec=Mus musculus chr=6 ctg=NT_039356 str=(-) start=2341012 end=2342012 len=1001 tss=501 comm=NADH dehydrogenase (ubiquinone) 1 alpha subcomplex, 9; (NM_025358/501/bronze;)                    | 1001 bp |
| 3   | P921930       | sym=nalloc loc=Loc362440 taxid=10116 spec=Rattus norvegicus chr=4 ctg=NW_047696 str=(-) start=16340910 end=16341910 len=1001 tss=501 comm=similar to NADH dehydrogenase (ubiquinone) 1 alpha subcomplex, 9; (XM_342761/501/bronze;) | 1001 bp |

**Alignment (DiAlign format):**

Please note that only **upper-case** letters are considered to be **aligned**. For more information, please have a look at the user guide.

V\$YYIF V\$BRNF V\$OCTI V\$APIE V\$STAT V\$NRFI V\$NRLE V\$STAF V\$BRAC V\$SHIF V\$TEAF  
V\$VBPE

alignment position 1 . . . . . 1 1 . . . . . 2 1 . . . . . 3 1 . . . . . 4 1 . . . . .  
**P921928** 1 t t g g g a - - - - -  
**P921929** 1 g g a t g t t c c t g g c GGC GT T G GCGT - - - - - G CGAGGGGC T T  
**P921930** 1 t t t t g a t - - - - GGC GT T G GCGT g c a c t t a c t t t g g c g G CGAGGGGC T T  
\*\*\*\*\* \*\*\*\*\* \*\*\*\*\*









© Genomatix Software GmbH 1998-2005  
- All rights reserved.

[License Agreement](#)

GEMS Launcher 4.1.1

[Genomatix-Logo](#)
[Logout](#)
[Personal](#)
[Messages](#)
[GEMS-Logo](#)

[Genomatix Main](#)
[GEMSEI](#)
[Dorado](#)
[Gene2Promoter](#)
[BiblioSphere](#)  
[Frequently asked questions](#)
[Your Results](#)
[Your Sequences](#)
[Your Protocol](#)
[Help](#)

**GEMS Launcher Task: *DiAlign TF*: Multiple alignment plus TF sites working on promoters.seq (3 seq.)**

[\[Alignment\]](#)
[\[Pairwise similarities\]](#)

DiAlign professional TF Release 3.1 December 2004

Tue Jun 7 01:08:06 2005

**Solution parameters:**

**Sequence file:** [promoters.seq](#) (3 seq.)  
**Type of sequences:** nucleotide sequences  
**Threshold T:** 0.00  
**'\*' signs below alignment denote:** diagonal similarity (max. similarity is represented by 10 '\*' signs)  
**Alignment output:** complete alignment is shown  
# nucleic acids per line: 50  
**TF output:** common TF matches located in aligned regions (common to 3 (100.0 %) sequences)  
**Family matches:** yes  
**MatInspector library:** Matrix Family Library Version 5.0 (February 2005)  

- ALL user\_defined.lib (0.75/Optimized)
- ALL vertebrates.lib (0.75/Optimized)

**Selected groups**  
(core/matrix sim):

**Aligned Sequences:**

| No. | Sequence Name | Sequence Description                                                                                                                                                                                                                                          | Length  |
|-----|---------------|---------------------------------------------------------------------------------------------------------------------------------------------------------------------------------------------------------------------------------------------------------------|---------|
| 1   | P982079       | sym=NDUFA10 loc=Loc4705 taxid=9606 spec=Homo sapiens chr=2 ctg=NT_005416 str=(-) start=138902 end=139902 len=1001 tss=501 comm=NADH dehydrogenase (ubiquinone) 1 alpha subcomplex, 10, 42kDa; (NM_004544/501/silver;)                                         | 1001 bp |
| 2   | P982083       | sym=Ndufa10 loc=Loc67273 taxid=10090 spec=Mus musculus chr=1 ctg=NT_039173 str=(-) start=6870406 end=6871447 len=1042 tss=501,506,542 comm=NADH dehydrogenase (ubiquinone) 1 alpha subcomplex 10; (AK013675/517/gold;AK005339/522/gold;NM_024197/558/silver;) | 1042 bp |
| 3   | P982085       | sym=Ndufa10 loc=Loc314071 taxid=10116 spec=Rattus norvegicus chr=9 ctg=NW_047817 str=(-) start=7820309 end=7821309 len=1001 tss=501 comm=NADH dehydrogenase (ubiquinone) 1 alpha subcomplex 10; (XM_234089/558/bronze;)                                       | 1001 bp |

**Alignment (DiAlign format):**

Please note that only **upper-case** letters are considered to be **aligned**. For more information, please have a look at the user guide.

V\$MAZF
V\$E4FF
V\$HESF
V\$GCR
V\$REF
V\$SFI
V\$REBV
V\$EBOX

alignment position 1 . . . . . 1 1 . . . . . 2 1 . . . . . 3 1 . . . . . 4 1 . . . . .  
**P982079** 1 t g g a t g a g a c c a c t t a g c c t t c a g c t c c g g a g g c g a - - - - -  
**P982083** 1 t t c t c t c a g a a a c c t a g g c a g g g a g a a t g t g a c g c c c c t a g a a c t c a g a t  
**P982085** 1 - - - - -

|                |          |                     |                     |                     |                       |                     |
|----------------|----------|---------------------|---------------------|---------------------|-----------------------|---------------------|
| alignment      | position | 5 1 . . . . .       | 6 1 . . . . .       | 7 1 . . . . .       | 8 1 . . . . .         | 9 1 . . . . .       |
| <b>P982079</b> | 37       | - - - - -           | - - - - -           | - - - - -           | - - - - -             | - - - - -           |
| <b>P982083</b> | 51       | g g g g a a t g g a | c t c t c t c c t c | a g c g a c c a g a | a g g GCGGGGA         | G C G G A T C C T C |
| <b>P982085</b> | 1        | - - - - -           | - - - - -           | - - - - -           | - - - G C A G T G A   | G C A G A T C C T C |
|                |          |                     |                     |                     | *****                 | *****               |
| alignment      | position | 1 0 1 . . . . .     | 1 1 1 . . . . .     | 1 2 1 . . . . .     | 1 3 1 . . . . .       | 1 4 1 . . . . .     |
| <b>P982079</b> | 37       | - - - - -           | - - - - -           | - - - - -           | - - - - -             | - - - - -           |
| <b>P982083</b> | 101      | C C T A C A G a a c | t c a a a - - - -   | - - - - -           | C A G A A A G T G G   | G T C t a c g t t t |
| <b>P982085</b> | 18       | C C C T C A G a c t | g g g a g t g g g t | c c a t g c a a c c | C A G G A A G T G G   | A T C c t c t t g t |
|                |          | *****               |                     |                     | *****                 | *****               |
| alignment      | position | 1 5 1 . . . . .     | 1 6 1 . . . . .     | 1 7 1 . . . . .     | 1 8 1 . . . . .       | 1 9 1 . . . . .     |
| <b>P982079</b> | 37       | - - - - -           | - - - - -           | - - - - -           | - - - - -             | - - - - -           |
| <b>P982083</b> | 136      | g g - - - - -       | G C G T G G A G C A | G G G A G A C A G C | A - - - - -           | - - C A G A T T C T |
| <b>P982085</b> | 68       | c a g a g c t c g a | G C G T G G A G C A | G A G A G G C A G C | A g g t t c t c a c t | g C A G A A T C T   |
|                |          |                     | *****               | *****               | *                     | *****               |
|                |          |                     |                     |                     |                       | *****               |
|                |          |                     |                     |                     |                       | *****               |
|                |          |                     |                     |                     |                       | *****               |
| alignment      | position | 2 0 1 . . . . .     | 2 1 1 . . . . .     | 2 2 1 . . . . .     | 2 3 1 . . . . .       | 2 4 1 . . . . .     |
| <b>P982079</b> | 37       | - - - - -           | - - - - -           | - - - - -           | - - - - -             | - - - - -           |
| <b>P982083</b> | 167      | G G G G A G C G A G | A G G A T T C A C C | C C A C A G A A C A | C C t g g g a g t g   | g g g g - - - - -   |
| <b>P982085</b> | 118      | G G G G A G C G A G | C G G A T C C A C C | C C A C A G A A T A | C C c a g a g a g a   | g g a g g g g t a   |
|                |          | *****               | *****               | *****               | *****                 | *****               |
|                |          | *****               | *****               | *****               | *****                 | *****               |
|                |          | *****               | *****               | *****               | *****                 | *****               |
|                |          | *****               | *****               | *****               | *****                 | *****               |
| alignment      | position | 2 5 1 . . . . .     | 2 6 1 . . . . .     | 2 7 1 . . . . .     | 2 8 1 . . . . .       | 2 9 1 . . . . .     |
| <b>P982079</b> | 37       | - - - - -           | - - - - -           | - - - - -           | - - - - -             | - - - - -           |
| <b>P982083</b> | 211      | G T C A C A C T T T | T G T C A C A C A A | C T C A A G C A T C | T G C G A G A - A C   | C C G A G C T C A A |
| <b>P982085</b> | 168      | G T C A C A C T T T | T G T C A C A C A A | C T C C A G C A T C | T G C G A G A a A C   | C C G A A C T C A A |
|                |          | *****               | *****               | *****               | *****                 | *****               |
|                |          | *****               | *****               | *****               | *****                 | *****               |
|                |          | *****               | *****               | *****               | *****                 | *****               |
|                |          | *****               | *****               | *****               | *****                 | *****               |
| alignment      | position | 3 0 1 . . . . .     | 3 1 1 . . . . .     | 3 2 1 . . . . .     | 3 3 1 . . . . .       | 3 4 1 . . . . .     |
| <b>P982079</b> | 37       | - - - - -           | - - - - - C C C     | A - - - - -         | - - - - - G G C C G G | C C T T g c c a g g |
| <b>P982083</b> | 260      | A G C T G G G A G C | C T C a a g g C C C | A - - - - -         | - - - - - G G C A G G | A C T T C T A G C C |
| <b>P982085</b> | 218      | G A C T G G C A G C | C T C c g t g c a a | t t c a c a a g g c | t c a g G G T G G G   | T C T T T C G C C   |
|                |          | *****               | *****               | *****               | *****                 | *****               |
| alignment      | position | 3 5 1 . . . . .     | 3 6 1 . . . . .     | 3 7 1 . . . . .     | 3 8 1 . . . . .       | 3 9 1 . . . . .     |
| <b>P982079</b> | 57       | t c c c t c t c c c | t g a c a g g c g c | c c c g c g a c a g | g g g t c c c a c c   | c c g t c c c t c C |
| <b>P982083</b> | 297      | C T T T G C C A C T | T T C A T A C T A T | A a c t t g t c t a | g g a t c t a g G C   | G - - - - - C       |
| <b>P982085</b> | 268      | C T T C C C C A G A | C T T G T A C T G T | A t g g g t c g a g | g a a g t a - - G C   | A - - - - - C       |
|                |          | *****               | *****               | *                   | *****                 | *                   |
|                |          |                     |                     |                     | **                    | *                   |
|                |          |                     |                     |                     |                       | *                   |
| alignment      | position | 4 0 1 . . . . .     | 4 1 1 . . . . .     | 4 2 1 . . . . .     | 4 3 1 . . . . .       | 4 4 1 . . . . .     |
| <b>P982079</b> | 107      | G C T C C T C G C C | C c c t c t t t t t | c c a c t t t c c c | t c c c c a g c g a   | g a a c g t t c t g |
| <b>P982083</b> | 339      | G C T C C T C G C C | C A A A C A A T C T | A A g c t c a a g c | a a c t a g a g c g   | t c g a c a a - - - |
| <b>P982085</b> | 308      | G C T C C C C G C C | C A A A C A A T C T | A A a c c c g g c   | c c a g a g c c g c   | a a t c t a g a - - |
|                |          | *****               | *****               | *****               | *****                 | *****               |
|                |          | *****               | *****               | *****               | *****                 | *****               |
|                |          | *****               | *****               | *****               | *****                 | *****               |
| alignment      | position | 4 5 1 . . . . .     | 4 6 1 . . . . .     | 4 7 1 . . . . .     | 4 8 1 . . . . .       | 4 9 1 . . . . .     |
| <b>P982079</b> | 157      | a g a g c t a g g a | a t g t t c t c t a | g g a g g t c g c t | t t g a c g t c c a   | c a c c g c g c c t |
| <b>P982083</b> | 386      | - - - - -           | - - - - -           | - - - - -           | - - - - -             | - - - - -           |
| <b>P982085</b> | 356      | - - - - -           | - - - - -           | - - - - -           | - - - - -             | - - - - -           |



|                    |                         |                     |                     |                     |                     |
|--------------------|-------------------------|---------------------|---------------------|---------------------|---------------------|
| alignment position | 5 0 1 . . . . .         | 5 1 1 . . . . .     | 5 2 1 . . . . .     | 5 3 1 . . . . .     | 5 4 1 . . . . .     |
| P982079            | 207 g g g g g a t t c t | g c g g g g a g c a | c a g g a c c c t g | g g a c g a g a c g | c a g a a g t c g c |
| P982083            | 386 - - - - -           | - - - - -           | - - - - -           | - - - - -           | - - - - -           |
| P982085            | 356 - - - - -           | - - - - -           | - - - - -           | - - - - -           | - - - - -           |
|                    |                         |                     |                     |                     |                     |
| alignment position | 5 5 1 . . . . .         | 5 6 1 . . . . .     | 5 7 1 . . . . .     | 5 8 1 . . . . .     | 5 9 1 . . . . .     |
| P982079            | 257 t c c a c g c c c t | g g g c g G C C T C | A G C T C C c g c g | a c a c c g c a g c | a a c t c a g a a c |
| P982083            | 386 - - - - -           | - - - - - G C C T A | A G C T C C G C C C | C T T C C C T C T - | - - - - -           |
| P982085            | 356 - - - - -           | - - - - - C C T A   | A G C C C C G C C C | C T T C C C T C T - | - - - - -           |
|                    |                         |                     | * * * * *           | * * * * *           | * * * * *           |
|                    |                         |                     | * * * * *           | * * * * *           | * * * * *           |
|                    |                         |                     | * * * * *           | * * * * *           | * * * * *           |
|                    |                         |                     |                     |                     |                     |
| alignment position | 6 0 1 . . . . .         | 6 1 1 . . . . .     | 6 2 1 . . . . .     | 6 3 1 . . . . .     | 6 4 1 . . . . .     |
| P982079            | 307 c c a g g c a g g g | g c c g g g c a g c | c a g c a t g c t g | c c c c c a c g t t | c a c c t c c a a c |
| P982083            | 410 - - - - -           | - - - - -           | - - - - -           | - - - - -           | - - - - -           |
| P982085            | 379 - - - - -           | - - - - -           | - - - - -           | - - - - -           | - - - - -           |
|                    |                         |                     |                     |                     |                     |
| alignment position | 6 5 1 . . . . .         | 6 6 1 . . . . .     | 6 7 1 . . . . .     | 6 8 1 . . . . .     | 6 9 1 . . . . .     |
| P982079            | 357 t c c c a c c t c t | c g g c c c t c g c | c c c a a c c c g c | a g g a c c c t g g | c a g c g c a c t g |
| P982083            | 410 - - - - -           | - - - - -           | - - - - -           | - - - - -           | - - - - -           |
| P982085            | 379 - - - - -           | - - - - -           | - - - - -           | - - - - -           | - - - - -           |
|                    |                         |                     |                     |                     |                     |
| alignment position | 7 0 1 . . . . .         | 7 1 1 . . . . .     | 7 2 1 . . . . .     | 7 3 1 . . . . .     | 7 4 1 . . . . .     |
| P982079            | 407 g c t g t c t c c g | c g g a a g c c c c | c g a g g g c c t c | g g c g c G G C C C | C G C C C C c t g g |
| P982083            | 410 - - - - -           | - - - - -           | - - - - -           | - - - - - G G C C C | C G C C C G T C c   |
| P982085            | 379 - - - - -           | - - - - -           | - - - - -           | - - - - - G G C T C | T G C C C A T C t   |
|                    |                         |                     |                     | * * * * *           | * * * * *           |
|                    |                         |                     |                     | * * * * *           | * * * * *           |
|                    |                         |                     |                     | * * * * *           | * * * * *           |
|                    |                         |                     |                     |                     |                     |
| alignment position | 7 5 1 . . . . .         | 7 6 1 . . . . .     | 7 7 1 . . . . .     | 7 8 1 . . . . .     | 7 9 1 . . . . .     |
| P982079            | 457 a a g g - - - - -   | - - - - -           | T T C C C G A C A G | G C G C C G C G G G | C A C C C C G g c c |
| P982083            | 425 c a g t t c c g g a | a t a t t t t c T T | T T T T C G A C A G | G C G C C G C G A A | C A C T C A G T G - |
| P982085            | 394 c g g g t a g t - - | - - - - - T T       | T T T C C G A C A G | G C G C C G C G G A | C A C T C G G T T - |
|                    |                         |                     | * * * * *           | * * * * *           | * * * * *           |
|                    |                         |                     | * * * * *           | * * * * *           | * * * * *           |
|                    |                         |                     | * * * * *           | * * * * *           | * * * * *           |
|                    |                         |                     | * * * * *           | * * * * *           | * * * * *           |
|                    |                         |                     | * * * * *           | * * * * *           | * * * * *           |
|                    |                         |                     |                     |                     |                     |
| alignment position | 8 0 1 . . . . .         | 8 1 1 . . . . .     | 8 2 1 . . . . .     | 8 3 1 . . . . .     | 8 4 1 . . . . .     |
| P982079            | 491 G T G A C G T C A C | G G C A G C G C G C | C G g c c g C G A G | A G A G G G C C C C | G T C G C G A C C G |
| P982083            | 474 G T G A C G T C A T | G G C A G C G C G C | C G C G G A C G A G | C T A G G A C C C C | G T C G C G T T C A |
| P982085            | 433 G T G A C G T C A T | G T C A G C G C G C | C G C G G A C A A G | A T A G G A C C C T | G T C G C G T T C A |
|                    | * * * * *               | * * * * *           | * * * * *           | * * * * *           | * * * * *           |
|                    | * * * * *               | * * * * *           | * * * * *           | * * * * *           | * * * * *           |
|                    | * * * * *               | * * * * *           | * * * * *           | * * * * *           | * * * * *           |
|                    | * * * * *               | * * * * *           | * * * * *           | * * * * *           | * * * * *           |
|                    | * * * * *               | * * * * *           | * * * * *           | * * * * *           | * * * * *           |
|                    | * * * * *               | * * * * *           | * * * * *           | * * * * *           | * * * * *           |
|                    |                         |                     |                     |                     |                     |
| alignment position | 8 5 1 . . . . .         | 8 6 1 . . . . .     | 8 7 1 . . . . .     | 8 8 1 . . . . .     | 8 9 1 . . . . .     |
| P982079            | 541 C G T C C C c t t g | G G T C C T T G A T | C C T G A G C T G A | C C G G G T A G C C | A T G G C C T T G c |
| P982083            | 524 T G T C C C T C T - | G G T C C T T G A G | C C G G C G C A G A | C G G C G A A G T C | A T G G C C T T G A |
| P982085            | 483 C G T C C C T C T - | G G T C C T T G A G | C C G G C G C A G G | C A G C G A A G C A | A T G G C C T T G A |
|                    | * * * * *               | * * * * *           | * * * * *           | * * * * *           | * * * * *           |
|                    | * * * * *               | * * * * *           | * * * * *           | * * * * *           | * * * * *           |
|                    | * * * * *               | * * * * *           | * * * * *           | * * * * *           | * * * * *           |
|                    | * * * * *               | * * * * *           | * * * * *           | * * * * *           | * * * * *           |
|                    | * * * * *               | * * * * *           | * * * * *           | * * * * *           | * * * * *           |
|                    | * * * * *               | * * * * *           | * * * * *           | * * * * *           | * * * * *           |





Please note that the **similarity value 1.000** marks only the two **most similar** sequences, it does not necessarily mean that these sequences are identical.

| Extract alignment region      |                                                     |
|-------------------------------|-----------------------------------------------------|
| <b>Positions in alignment</b> | from: <input type="text"/> to: <input type="text"/> |
| <b>Output file</b>            | <input type="text" value="dialign.seq"/>            |

Extract aligned sequences

For [comments](#), questions or bug reports, please contact [support@genomatix.de](mailto:support@genomatix.de)

© Genomatix Software GmbH 1998-2005  
- All rights reserved.

[License Agreement](#)

GEMS Launcher 4.1.1

[Genomatix-Logo](#)      [Logout](#)      [Personal](#)      [Messages](#)      [GEMS-Logo](#)  
[Logout](#)      [Personal](#)      [Messages](#)

[Genomatix](#) [Main](#) [GEMSEI](#) [Dorado](#) [Gene2](#) [Promoter](#) [BiblioSphere](#)  
[Frequently asked questions](#) [Your Results](#) [Your Sequences](#) [Your Protocol](#) [Help](#)

**GEMS Launcher Task: *DiAlign TF*: Multiple alignment plus TF sites working on promoters.seq (3 seq.)**

[\[Alignment\]](#)   [\[Pairwise similarities\]](#)

DiAlign professional TF Release 3.1 December 2004

Tue Jun 7 02:18:19 2005

### Solution parameters:

**Sequence file:** [promoters.seq](#) (3 seq.)  
**Type of sequences:** nucleotide sequences  
**Threshold T:** 0.00  
**\*! signs below alignment denote:** diagonal similarity (max. similarity is represented by 10 '!' signs)  
**Alignment output:** complete alignment is shown  
# nucleic acids per line: 50  
**TF output:** common TF matches located in aligned regions (common to 3 (100.0 %) sequences)  
**Family matches:** yes  
**MatInspector library:** Matrix Family Library Version 5.0 (February 2005)  

- ALL user\_defined.lib (0.75/Optimized)
- ALL vertebrates.lib (0.75/Optimized)

**Selected groups**  
(core/matrix sim):

### Aligned Sequences:

| No. | Sequence Name | Sequence Description                                                                                                                                                                                                                                    | Length  |
|-----|---------------|---------------------------------------------------------------------------------------------------------------------------------------------------------------------------------------------------------------------------------------------------------|---------|
| 1   | P865912       | sym=NDUFAF1 loc=Loc51103 taxid=9606 spec=Homo sapiens chr=15 ctg=NT_010194 str=(-) start=12484677 end=12485677  len=1001 tss=501  comm=NADH dehydrogenase (ubiquinone) 1 alpha subcomplex, assembly factor 1; (NM_016013/501/bronze;)                   | 1001 bp |
| 2   | P865914       | sym=Ndufaf1 loc=Loc69702 taxid=10090 spec=Mus musculus chr=2 ctg=NT_039207 str=(-) start=60384597 end=60385597  len=1001 tss=501  comm=NADH dehydrogenase (ubiquinone) 1 alpha subcomplex, assembly factor 1; (AK010328/501/gold;NM_027175/501/bronze;) | 1001 bp |
| 3   | P865917       | sym=naloc=Loc296086 taxid=10116 spec=Rattus norvegicus chr=3 ctg=NW_047657 str=(-) start=47582514 end=47583514  len=1001 tss=501  comm=similar to NADH dehydrogenase (ubiquinone) 1 alpha subcomplex, assembly factor 1; (XM_215814/501/bronze;)        | 1001 bp |

### Alignment (DiAlign format):

Please note that only **upper-case** letters are considered to be **aligned**. For more information, please have a look at the user guide.

**Warning: No common TF matches found.**

```

alignment position 1 . . . . . 11 . . . . . 21 . . . . . 31 . . . . . 41 . . . . .
P865912      1 c c g t c t c t a c t a a a a t a c a a a a t t a g t c g g g c a t g a t g g c g c g c a c c t
P865914      1 g t g t g c a c a a g c t c t g t t g t g t g g a t t a c a t a G G G G C A C G A C T G A G G A A A
P865917      1 g g a t t a t g t g g - - - - - - - - - - - - - - - - - - - - - - - - G G G G C A C G A T T G A G G A A A
    
```



**P865917** 321 ATTACAAGAA GTAGAGCGAA GAGCTCGCTC ACAAAGGACA GGAa ATTT CA  
 \*\*\*\*\*  
 \*\*\*\*\*  
 \*\*\*\*\*  
 \*\*\*\*\*

alignment position 401..... 411..... 421..... 431..... 441.....

**P865912** 275 acaactggcg accaagtggg ccaaaaacct CAAAAACCT CAGt tggc t g  
**P865914** 298 GAAAGCGACC CCGCTGGGGA ATTTTGAg g A CCGAAGCCT CCGGTTGTCT  
**P865917** 371 GAAAGCGAAC CCGCTGGGGA ACTTTGAa t A CAAAAAGCCT CAGGTTGTCC  
 \*\*\*\*\*  
 \*\*\*\*\*  
 \*\*\*\*\*  
 \*\*\*\*\*

alignment position 451..... 461..... 471..... 481..... 491.....

**P865912** 325 g - - GCTACGG GGTCCTTGCT GTCCTTCTG GGCTt c t g t a c t c g g c c g g a  
**P865914** 348 TACGCTTTAG GATACTTTCC GTTACTCTTG AACTATCTGA AGCTCTTg t t  
**P865917** 421 CATGCTTTAG GATACCTTt t GGTACTCTTG TACGACCTGA AACTCTA- - -  
 \*\*\*\*\*  
 \*\*\*\*\*  
 \*\*\*\*\*

alignment position 501..... 511..... 521..... 531..... 541.....

**P865912** 373 a c t t t g g t g t t c t g ACGCCT TGTTTGGCAT C GGAAGGGAA AAGCAGAT GG  
**P865914** 398 t a c t g T- - - - - ACACCT AGTTTGATGT C GGACAGGAA AAGTAGCGGG  
**P865917** 468 - - - - - T- - - - - ACACCT AGTTTGGTGC C GGACGGAA AAATAGAT GG  
 \*  
 \*  
 \*  
 \*

alignment position 551..... 561..... 571..... 581..... 591.....

**P865912** 423 ACCTa t a c g g g t a a a g t g g c t - - - - - - - - - - - - - - - - CTGGG  
**P865914** 440 ACCa c a ACCG GAAGCGT GGC GAACCGGGCG AGAAAAGTAG AAGGACTa t t  
**P865917** 505 ACCTg c ACCG GAAGCGT GGA GAACCGGGCG GAGAAAACAG AAGGACTGCG  
 \*\*\*\*\*  
 \*\*\*\*\*  
 \*\*\*\*\*  
 \*\*\*\*\*  
 \*\*\*\*\*  
 \*\*\*\*\*  
 \*\*\*\*\*  
 \*\*\*\*\*

alignment position 601..... 611..... 621..... 631..... 641.....

**P865912** 450 C - - - GGAAGg t a c - - - - - - - - - - - - - - - - - - - - - - - - - - - -  
**P865914** 490 c g g g GGAAGC CGAATGT G- - GGGT CTGAGA AGGTGAGCGG AACCTTCT CA  
**P865917** 555 C - - - GGAAGC CATATGT Gg g GGGT CTGAGA AGGTAAAGCTG ACCCTTCTCC  
 \*  
 \*\*\*\*\*  
 \*\*\*\*\*  
 \*\*\*\*\*  
 \*\*\*\*\*  
 \*\*\*\*\*

alignment position 651..... 661..... 671..... 681..... 691.....

**P865912** 460 - - - - - - - - A CTATAGGCTC GGGGAGGTa a g c g g c g g c a g g c c g g c g g t t  
**P865914** 538 TAGGTGGGAA CTGCAGGGAC GAGGAGGTCTG GGA- - - - - - - - - - - - - - - -  
**P865917** 602 TAGATGGGAA a c t CAGGGAC AAGGAGGCGG GGA- - - - - - - - - - - - - - - -  
 \*\*\*\*\*  
 \*\*\*\*\*  
 \*\*\*\*\*  
 \*\*\*\*\*  
 \*\*\*\*\*







|                      | (1001 bp)     | (1001 bp)                   |
|----------------------|---------------|-----------------------------|
| P865912<br>(1001 bp) | 0.097<br>28 % | 0.143<br>28 %               |
| P865914<br>(1001 bp) |               | <u>1.000</u><br><u>74 %</u> |

Please note that the **similarity value 1.000** marks only the two **most similar** sequences, it does not necessarily mean that these sequences are identical.

| Extract alignment region  |                                                     |
|---------------------------|-----------------------------------------------------|
| Positions in alignment    | from: <input type="text"/> to: <input type="text"/> |
| Output file               | <input type="text" value="dialign.seq"/>            |
| Extract aligned sequences |                                                     |

For [comments](#), questions or bug reports, please contact [support@genomatix.de](mailto:support@genomatix.de)

© Genomatix Software GmbH 1998-2005  
- All rights reserved.

[License Agreement](#)

GEMS Launcher 4.1.1

[Genomatix-Logo](#)     
 [Logout](#)     
 [Personal](#)     
 [Messages](#)     
 [GEMS-Logo](#)

[Genomatix Main](#)
[GEMSEI](#)
[Dorado](#)
[Gene2Promoter](#)
[BiblioSphere](#)  
[Frequently asked questions](#)
[Your Results](#)
[Your Sequences](#)
[Your Protocol](#)
[Help](#)

**GEMS Launcher Task: *DiAlign TF*: Multiple alignment plus TF sites working on C1-NDUFB1 (3 seq.)**

[\[Alignment\]](#)  
 [\[Pairwise similarities\]](#)

DiAlign professional TF Release 3.1 December 2004

Tue Jun 7 14:05:14 2005

**Solution parameters:**

**Sequence file:** [C1-NDUFB1](#) (3 seq.)  
**Type of sequences:** nucleotide sequences  
**Threshold T:** 0.00  
**'\*' signs below alignment denote:** diagonal similarity (max. similarity is represented by 10 '\*' signs) complete alignment is shown  
**Alignment output:** # nucleic acids per line: 50  
**TF output:** common TF matches located in aligned regions (common to 3 (100.0 %) sequences)  
**Family matches:** yes  
**MatInspector library:** Matrix Family Library Version 5.0 (February 2005)  
**Selected groups** (core/matrix sim):
 

- ALL user\_defined.lib (0.75/Optimized)
- ALL vertebrates.lib (0.75/Optimized)

**Aligned Sequences:**

| No. | Sequence Name | Sequence Description                                                                                                                                                                                                           | Length  |
|-----|---------------|--------------------------------------------------------------------------------------------------------------------------------------------------------------------------------------------------------------------------------|---------|
| 1   | P303789       | P303789 sym=NDUFB1 loc=Loc4707 taxid=9606 spec=Homo sapiens chr=14 ctg=NT_026437 str=(-) start=73587406 end=73588406 len=1001 tss=501 comm=NADH dehydrogenase (ubiquinone) 1 beta subcomplex, 1, 7kDa; (NM_004545/501/bronze;) | 1001 bp |
| 2   | mNDUFB1       | mNDUFB1 m5_dna range=chr12:96654325-96656324 5'pad=0 3'pad=0 revComp=TRUE strand=? repeatMasking=none                                                                                                                          | 2000 bp |
| 3   | rNDUFB1       | rNDUFB1 n3_dna range=chr6:126249139-126250606 5'pad=0 3'pad=0 revComp=TRUE strand=? repeatMasking=none                                                                                                                         | 1468 bp |

**Alignment (DiAlign format):**

Please note that only **upper-case** letters are considered to be **aligned**. For more information, please have a look at the user guide.

[V\\$STAT](#) [V\\$IKRS](#) [V\\$YYIF](#) [V\\$NRF1](#) [V\\$SEREF](#) [V\\$RREB](#)

```

alignment position 1 . . . . . 1 1 . . . . . 2 1 . . . . . 3 1 . . . . . 4 1 . . . . .
P303789          1 g t c a - - - - -
mNDUFB1        1 g a a c t a g G A A T G G G A T C T T G G G A A a c g t g G T G A T T G T G G t a g c g c c g a g
rNDUFB1        1 - - - - - G A A T G G G A T C T T G G G A A t c a - - G T G A T T G T G G a g g c a c t a a g
                    * * * * *
                    * * * * *
alignment position 5 1 . . . . . 6 1 . . . . . 7 1 . . . . . 8 1 . . . . . 9 1 . . . . .
P303789        5 - - - - -
    
```

|                    |     |                 |                |                  |                    |                     |                    |       |       |       |
|--------------------|-----|-----------------|----------------|------------------|--------------------|---------------------|--------------------|-------|-------|-------|
| <b>mNDUFB1</b>     | 51  | a - - GAAGTT A  | ATT CTATC AA   | GGCGT GGCAT      | g a g              | CCT CTCA A          | GGGTCT TTG         |       |       |       |
| <b>rNDUFB1</b>     | 41  | c g c GACGTT A  | ATT CTAGC AA   | GGCGT GGCAT      | a a a              | CCT CTCA A          | GGGTCT TTG         |       |       |       |
|                    |     | *****           | *****          | *****            |                    | *****               | *****              |       |       |       |
|                    |     | *****           | *****          | *****            |                    | *****               | *****              |       |       |       |
|                    |     | *****           | *****          | *****            |                    | *****               | *****              |       |       |       |
| alignment position | 101 | .....           | 111            | .....            | 121                | .....               | 131                | ..... | 141   | ..... |
| <b>P303789</b>     | 5   | -----           | -----          | -----            | -----              | -----               | -----              | ----- | ----- | ----- |
| <b>mNDUFB1</b>     | 99  | GAATT AAGG A    | GCT ACG AAGG   | CACc t g CTGG    | CCT CGT GTTC       | T CTGAGC CCA        |                    |       |       |       |
| <b>rNDUFB1</b>     | 91  | AAGTT AAGG A    | GCT AGG AAGG   | CAC - - CTGG     | CCT CGT GGT C      | T CTGAAC CCA        |                    |       |       |       |
|                    |     | *****           | *****          | *****            | *****              | *****               | *****              |       |       |       |
|                    |     | *****           | *****          | *****            | *****              | *****               | *****              |       |       |       |
|                    |     | *****           | *****          | *****            | *****              | *****               | *****              |       |       |       |
|                    |     | *****           | *****          | *****            | *****              | *****               | *****              |       |       |       |
| alignment position | 151 | .....           | 161            | .....            | 171                | .....               | 181                | ..... | 191   | ..... |
| <b>P303789</b>     | 5   | -----           | -----          | -----            | -----              | -----               | -----              | ----- | ----- | ----- |
| <b>mNDUFB1</b>     | 149 | AGATGGGAA A     | GGC Ag AGA TG  | GGGAG GC TTG     | GGG AGT ACGG       | C GGT ACA AGG       |                    |       |       |       |
| <b>rNDUFB1</b>     | 138 | AGATGGGAA A     | GGC Ac AGA TG  | GGGAG GC TTG     | GGG AGT AAAG       | C GGCAAC AGG        |                    |       |       |       |
|                    |     | *****           | *****          | *****            | *****              | *****               | *****              |       |       |       |
|                    |     | *****           | *****          | *****            | *****              | *****               | *****              |       |       |       |
|                    |     | *****           | *****          | *****            | *****              | *****               | *****              |       |       |       |
|                    |     | *****           | *****          | *****            | *****              | *****               | *****              |       |       |       |
| alignment position | 201 | .....           | 211            | .....            | 221                | .....               | 231                | ..... | 241   | ..... |
| <b>P303789</b>     | 5   | -----           | -----          | -----            | -----              | -----               | -----              | ----- | ----- | ----- |
| <b>mNDUFB1</b>     | 199 | GGAAa GAGC C    | CAG GCT GGAC   | GC GGATT AAC     | T T T TAGCTCC      | AGc t GAT GAA       |                    |       |       |       |
| <b>rNDUFB1</b>     | 188 | GGAA- GAGC C    | CAA GCA GGAC   | T C CGATT AAC    | T T T TAGT TCC     | AGa g GAT GAA       |                    |       |       |       |
|                    |     | *****           | *****          | *****            | *****              | *****               | *****              |       |       |       |
|                    |     | *****           | *****          | *****            | *****              | *****               | *****              |       |       |       |
|                    |     | *****           | *****          | *****            | *****              | *****               | *****              |       |       |       |
| alignment position | 251 | .....           | 261            | .....            | 271                | .....               | 281                | ..... | 291   | ..... |
| <b>P303789</b>     | 5   | -----           | -----          | -----            | -----              | -----               | -----              | ----- | ----- | ----- |
| <b>mNDUFB1</b>     | 249 | AGCTCAGAG G     | AAC T AG AC AG | GA GGg a g g g c | - - - - -          | AAG G AGGAAG CAT    |                    |       |       |       |
| <b>rNDUFB1</b>     | 237 | AGATCAGAG G     | AAA TGG AC AG  | AA GGa g g g c a | a g g g g c a      | AAG G AGGAAC CAT    |                    |       |       |       |
|                    |     | *****           | *****          | *****            | *****              | *****               | *****              |       |       |       |
|                    |     | *****           | *****          | *****            | *****              | *****               | *****              |       |       |       |
| alignment position | 301 | .....           | 311            | .....            | 321                | .....               | 331                | ..... | 341   | ..... |
| <b>P303789</b>     | 5   | -----           | -----          | -----            | -----              | -----               | -----              | ----- | ----- | ----- |
| <b>mNDUFB1</b>     | 292 | AGGCGCGCC C     | C- A ACA CCC   | GA GGT T T CAG   | C Cc g g g g a a a | a g t c a c t t c t |                    |       |       |       |
| <b>rNDUFB1</b>     | 287 | AGGAGCGCT C     | Ca A ACA CCC   | GA GGC T T CAG   | C C T T C T C T T  | - - - - -           |                    |       |       |       |
|                    |     | *****           | *****          | *****            | *****              | *****               | *****              |       |       |       |
|                    |     | *****           | *****          | *****            | *****              | *****               | *****              |       |       |       |
|                    |     | *****           | *****          | *****            | *****              | *****               | *****              |       |       |       |
| alignment position | 351 | .....           | 361            | .....            | 371                | .....               | 381                | ..... | 391   | ..... |
| <b>P303789</b>     | 13  | - - - TCCCT C   | GCT GAC C      | ACT              | TCTGC CGGA         | ACGACC              | GGGA C AGT CGC AGC |       |       |       |
| <b>mNDUFB1</b>     | 341 | c t t c CCCCT T | GCG GAA C      | GCT              | TGTTCC AGGA        | ACCACG              | GAGA C TGT CAC AAC |       |       |       |
| <b>rNDUFB1</b>     | 326 | - - - CCCCT T   | GCG GAA C      | GCT              | TGTTCC AGGA        | ACCACG              | GAGA C GGAC AC AAC |       |       |       |
|                    |     | *****           | *****          | *****            | *****              | *****               | *****              |       |       |       |
|                    |     | *****           | *****          | *****            | *****              | *****               | *****              |       |       |       |
|                    |     | *****           | *****          | *****            | *****              | *****               | *****              |       |       |       |
|                    |     | *****           | *****          | *****            | *****              | *****               | *****              |       |       |       |
|                    |     | *****           | *****          | *****            | *****              | *****               | *****              |       |       |       |
|                    |     | *****           | *****          | *****            | *****              | *****               | *****              |       |       |       |
|                    |     | *****           | *****          | *****            | *****              | *****               | *****              |       |       |       |
| alignment position | 401 | .....           | 411            | .....            | 421                | .....               | 431                | ..... | 441   | ..... |
| <b>P303789</b>     | 59  | CGAAGCGGC G     | GGG GCG AGTC   | Ct c GGGG GAG    | ACC GGGT CGG       | AGTC GGG GCC        |                    |       |       |       |
| <b>mNDUFB1</b>     | 391 | CGAAACCGC G     | GGA GCG CGTC   | C- - GGGC GAC    | ACC GGG CCGA       | C GCGGA ACC         |                    |       |       |       |
| <b>rNDUFB1</b>     | 372 | CGAAACCGC G     | GGA GCG CGTC   | C- - GGGC GAC    | ACC GGG CCGa t     | GCGGA ACC           |                    |       |       |       |





|                    |      |                     |                     |                     |             |                       |                     |                           |
|--------------------|------|---------------------|---------------------|---------------------|-------------|-----------------------|---------------------|---------------------------|
| <b>P303789</b>     | 601  | T C C A C T G G C G | C G G G T T G a g t | t c                 | c - - - - C | T G T T G C C C T     | G G T C T C G       | GGG                       |
| <b>mNDUFB1</b>     | 907  | T C C G C C G G C G | C C A G T G G C C T | A G C T C C C T     | G C         | G G C T G T C C T     | G G T C G C C       | T T G                     |
| <b>rNDUFB1</b>     | 885  | T C C G C C G T C G | C C A G T G G C C T | A G C T C C C T     | G C         | G G C T G T C C T     | G G T C G C G       | c t t                     |
|                    |      | * * * * *           | * * * * *           | * * * * *           | * * * * *   | * * * * *             | * * * * *           | * * * * *                 |
|                    |      | * * * * *           | * * * * *           | * * * * *           | * * * * *   | * * * * *             | * * * * *           | * * * * *                 |
|                    |      | * * * * *           | * * * * *           | * * * * *           | * * * * *   | * * * * *             | * * * * *           | * * * * *                 |
|                    |      | * * * * *           | * * * * *           | * * * * *           | * * * * *   | * * * * *             | * * * * *           | * * * * *                 |
|                    |      | * * * * *           | * * * * *           | * * * * *           | * * * * *   | * * * * *             | * * * * *           | * * * * *                 |
|                    |      | * * * * *           | * * * * *           | * * * * *           | * * * * *   | * * * * *             | * * * * *           | * * * * *                 |
| alignment position |      | 1 0 0 1 . . . . .   | 1 0 1 1 . . . . .   | 1 0 2 1 . . . . .   |             | 1 0 3 1 . . . . .     | 1 0 4 1 . . . . .   |                           |
| <b>P303789</b>     | 645  | T - C G C t g t a g | g c g c t g         | A G G C             | T G         | C A G G T G G G       | T T T G G G G       | A G C C C G G g g g c c   |
| <b>mNDUFB1</b>     | 957  | T - C A C C - - -   | - - - - -           | A G G C             | T G         | A A G G T G G G       | T C T G G G G       | A C C C C G G C G C C A C |
| <b>rNDUFB1</b>     | 935  | g a C A C C - - -   | - - - - -           | G G G C             | T G         | A A G G T G G G       | T C T G G G G       | A C C C A G T G C C A C   |
|                    |      | * * * * *           | * * * * *           | * * * * *           | * * * * *   | * * * * *             | * * * * *           | * * * * *                 |
|                    |      | * * * * *           | * * * * *           | * * * * *           | * * * * *   | * * * * *             | * * * * *           | * * * * *                 |
|                    |      | * * * * *           | * * * * *           | * * * * *           | * * * * *   | * * * * *             | * * * * *           | * * * * *                 |
|                    |      | * * * * *           | * * * * *           | * * * * *           | * * * * *   | * * * * *             | * * * * *           | * * * * *                 |
|                    |      | * * * * *           | * * * * *           | * * * * *           | * * * * *   | * * * * *             | * * * * *           | * * * * *                 |
|                    |      | * * * * *           | * * * * *           | * * * * *           | * * * * *   | * * * * *             | * * * * *           | * * * * *                 |
|                    |      | * * * * *           | * * * * *           | * * * * *           | * * * * *   | * * * * *             | * * * * *           | * * * * *                 |
| alignment position |      | 1 0 5 1 . . . . .   | 1 0 6 1 . . . . .   | 1 0 7 1 . . . . .   |             | 1 0 8 1 . . . . .     | 1 0 9 1 . . . . .   |                           |
| <b>P303789</b>     | 694  | g c c g c g a c g a | g g a t c a c g g c | g a c g g t g g c g |             | G G G A G G G T T C   | T A G G C A A g c c |                           |
| <b>mNDUFB1</b>     | 996  | C C - - G T G G T   | G G T G a t g c g G | G C - - - - -       |             | G G G A G G G T T C   | T G G G G A A C G C |                           |
| <b>rNDUFB1</b>     | 975  | C C t c t G T G G T | G G T G c a - - - G | G C - - - - -       |             | G G G A G G G T T C   | T G G G G A A C G C |                           |
|                    |      | * * * * *           | * * * * *           | * * * * *           |             | * * * * *             | * * * * *           |                           |
|                    |      | * * * * *           | * * * * *           | * * * * *           |             | * * * * *             | * * * * *           |                           |
|                    |      | * * * * *           | * * * * *           | * * * * *           |             | * * * * *             | * * * * *           |                           |
|                    |      | * * * * *           | * * * * *           | * * * * *           |             | * * * * *             | * * * * *           |                           |
|                    |      | * * * * *           | * * * * *           | * * * * *           |             | * * * * *             | * * * * *           |                           |
|                    |      | * * * * *           | * * * * *           | * * * * *           |             | * * * * *             | * * * * *           |                           |
| alignment position |      | 1 1 0 1 . . . . .   | 1 1 1 1 . . . . .   | 1 1 2 1 . . . . .   |             | 1 1 3 1 . . . . .     | 1 1 4 1 . . . . .   |                           |
| <b>P303789</b>     | 744  | c t c g g t g c t g | t g c a t g t g t g | g a g g g g t g g t |             | c t g g g c t t c c   | c c g g g g c t t c |                           |
| <b>mNDUFB1</b>     | 1035 | T C G C A T - - -   | - - - - -           | - - - - -           |             | - - - - -             | - - - - -           |                           |
| <b>rNDUFB1</b>     | 1014 | T C T C A T - - -   | - - - - -           | - - - - -           |             | - - - - -             | - - - - -           |                           |
|                    |      | * * * * *           | * * * * *           | * * * * *           |             | * * * * *             | * * * * *           |                           |
|                    |      | * * * * *           | * * * * *           | * * * * *           |             | * * * * *             | * * * * *           |                           |
|                    |      | * * * * *           | * * * * *           | * * * * *           |             | * * * * *             | * * * * *           |                           |
|                    |      | * * * * *           | * * * * *           | * * * * *           |             | * * * * *             | * * * * *           |                           |
|                    |      | * * * * *           | * * * * *           | * * * * *           |             | * * * * *             | * * * * *           |                           |
|                    |      | * * * * *           | * * * * *           | * * * * *           |             | * * * * *             | * * * * *           |                           |
| alignment position |      | 1 1 5 1 . . . . .   | 1 1 6 1 . . . . .   | 1 1 7 1 . . . . .   |             | 1 1 8 1 . . . . .     | 1 1 9 1 . . . . .   |                           |
| <b>P303789</b>     | 794  | c g a a c g a a g g | t g a c g G G A A A | G G A A A A T G G G |             | G T T T T C T T C G   | G G T G g a g g a t |                           |
| <b>mNDUFB1</b>     | 1041 | - - - - -           | - - - - G G A G G   | G G A A A c a - G G |             | G T C G C C T T C G   | G - T G A C C C C T |                           |
| <b>rNDUFB1</b>     | 1020 | - - - - -           | - - - - G G A G G   | G G A A A T C G G G |             | G T C G C C T T C G   | G G T G A C C T C T |                           |
|                    |      | * * * * *           | * * * * *           | * * * * *           |             | * * * * *             | * * * * *           |                           |
|                    |      | * * * * *           | * * * * *           | * * * * *           |             | * * * * *             | * * * * *           |                           |
|                    |      | * * * * *           | * * * * *           | * * * * *           |             | * * * * *             | * * * * *           |                           |
|                    |      | * * * * *           | * * * * *           | * * * * *           |             | * * * * *             | * * * * *           |                           |
|                    |      | * * * * *           | * * * * *           | * * * * *           |             | * * * * *             | * * * * *           |                           |
|                    |      | * * * * *           | * * * * *           | * * * * *           |             | * * * * *             | * * * * *           |                           |
| alignment position |      | 1 2 0 1 . . . . .   | 1 2 1 1 . . . . .   | 1 2 2 1 . . . . .   |             | 1 2 3 1 . . . . .     | 1 2 4 1 . . . . .   |                           |
| <b>P303789</b>     | 844  | g g - - G A T T T C | C G G G C C G G A G | C T T T T G G A A A |             | G G G T T - - - -     | - - - - -           |                           |
| <b>mNDUFB1</b>     | 1074 | G C G C G C T G C C | C G C C C C A C G C | C T T T T A C A A A |             | G A C T G - - - -     | - - - - -           |                           |
| <b>rNDUFB1</b>     | 1055 | G C G C G C T G T C | A G C T T C A C A C | C T T T C A C A G A |             | G A a t t c g c t a t | g c t a g c t t a   |                           |
|                    |      | * * * * *           | * * * * *           | * * * * *           |             | * * * * *             | * * * * *           |                           |
|                    |      | * * * * *           | * * * * *           | * * * * *           |             | * * * * *             | * * * * *           |                           |
|                    |      | * * * * *           | * * * * *           | * * * * *           |             | * * * * *             | * * * * *           |                           |
|                    |      | * * * * *           | * * * * *           | * * * * *           |             | * * * * *             | * * * * *           |                           |
|                    |      | * * * * *           | * * * * *           | * * * * *           |             | * * * * *             | * * * * *           |                           |
|                    |      | * * * * *           | * * * * *           | * * * * *           |             | * * * * *             | * * * * *           |                           |
| alignment position |      | 1 2 5 1 . . . . .   | 1 2 6 1 . . . . .   | 1 2 7 1 . . . . .   |             | 1 2 8 1 . . . . .     | 1 2 9 1 . . . . .   |                           |
| <b>P303789</b>     | 877  | - - - - -           | T T C T G A G G c t | g t c a t a a c a g |             | g a a a c g t c c     | g t a g a g a t g t |                           |
| <b>mNDUFB1</b>     | 1109 | - - - - -           | C T C T G G G G A C | - - - - -           |             | - - - - -             | - - - - -           |                           |
| <b>rNDUFB1</b>     | 1105 | a t c a a a g c g t | C T T T G G G G A C | - - - - -           |             | - - - - -             | - - - - -           |                           |





|                    |      |                     |                     |                     |                     |                     |
|--------------------|------|---------------------|---------------------|---------------------|---------------------|---------------------|
| <b>mNDUFB1</b>     | 1457 | a g t g g t g g t g | g c g c a t g c c t | t t a a t c c c a g | c a c t t g g a a a | g c a g a g g c a g |
| <b>rNDUFB1</b>     | 1469 | - - - - -           | - - - - -           | - - - - -           | - - - - -           | - - - - -           |
| alignment position | 1701 | . . . . .           | 1711                | . . . . .           | 1721                | . . . . .           |
| <b>P303789</b>     | 1002 | - - - - -           | - - - - -           | - - - - -           | - - - - -           | - - - - -           |
| <b>mNDUFB1</b>     | 1507 | g t g g a t t t c t | g a g t t c a a g g | c c a g g c t g g t | c t a c a g a g t g | a g t t c c a g g g |
| <b>rNDUFB1</b>     | 1469 | - - - - -           | - - - - -           | - - - - -           | - - - - -           | - - - - -           |
| alignment position | 1751 | . . . . .           | 1761                | . . . . .           | 1771                | . . . . .           |
| <b>P303789</b>     | 1002 | - - - - -           | - - - - -           | - - - - -           | - - - - -           | - - - - -           |
| <b>mNDUFB1</b>     | 1557 | c a g c c a g g g c | t t t a a a g a g a | a c c c c t g t c t | t g a a a a c a a a | a c a a c a a a a a |
| <b>rNDUFB1</b>     | 1469 | - - - - -           | - - - - -           | - - - - -           | - - - - -           | - - - - -           |
| alignment position | 1801 | . . . . .           | 1811                | . . . . .           | 1821                | . . . . .           |
| <b>P303789</b>     | 1002 | - - - - -           | - - - - -           | - - - - -           | - - - - -           | - - - - -           |
| <b>mNDUFB1</b>     | 1607 | a a a g t c t a c a | t g t t t c c a g c | a t g a a t c c a g | a t a g a a g a c t | c a g c a a a a t a |
| <b>rNDUFB1</b>     | 1469 | - - - - -           | - - - - -           | - - - - -           | - - - - -           | - - - - -           |
| alignment position | 1851 | . . . . .           | 1861                | . . . . .           | 1871                | . . . . .           |
| <b>P303789</b>     | 1002 | - - - - -           | - - - - -           | - - - - -           | - - - - -           | - - - - -           |
| <b>mNDUFB1</b>     | 1657 | a g a c t c a c a g | c a g t g t c t g t | t a t t c t t g a a | a a g g g a a a g a | a a c t t t a a t c |
| <b>rNDUFB1</b>     | 1469 | - - - - -           | - - - - -           | - - - - -           | - - - - -           | - - - - -           |
| alignment position | 1901 | . . . . .           | 1911                | . . . . .           | 1921                | . . . . .           |
| <b>P303789</b>     | 1002 | - - - - -           | - - - - -           | - - - - -           | - - - - -           | - - - - -           |
| <b>mNDUFB1</b>     | 1707 | c c a g c a c t t g | g a a a g c a g a g | g c a g g t g g t a | t t t a a g g g a a | a t a c c t t g t g |
| <b>rNDUFB1</b>     | 1469 | - - - - -           | - - - - -           | - - - - -           | - - - - -           | - - - - -           |
| alignment position | 1951 | . . . . .           | 1961                | . . . . .           | 1971                | . . . . .           |
| <b>P303789</b>     | 1002 | - - - - -           | - - - - -           | - - - - -           | - - - - -           | - - - - -           |
| <b>mNDUFB1</b>     | 1757 | t t a g a g a a a a | a t a t t a a g a a | a t a t g t g g g a | t g t g g g g t t a | a g t t g t t t t t |
| <b>rNDUFB1</b>     | 1469 | - - - - -           | - - - - -           | - - - - -           | - - - - -           | - - - - -           |
| alignment position | 2001 | . . . . .           | 2011                | . . . . .           | 2021                | . . . . .           |
| <b>P303789</b>     | 1002 | - - - - -           | - - - - -           | - - - - -           | - - - - -           | - - - - -           |
| <b>mNDUFB1</b>     | 1807 | g t t t t t a a a a | a g t c t c a c a c | a c a c a c a c a t | g g a g a g a g a g | a g a g a g a g a g |
| <b>rNDUFB1</b>     | 1469 | - - - - -           | - - - - -           | - - - - -           | - - - - -           | - - - - -           |
| alignment position | 2051 | . . . . .           | 2061                | . . . . .           | 2071                | . . . . .           |
| <b>P303789</b>     | 1002 | - - - - -           | - - - - -           | - - - - -           | - - - - -           | - - - - -           |
| <b>mNDUFB1</b>     | 1857 | a g a g a g a g a g | a g a g a g a g a g | a g a g a g a g a g | g c t c t g c a a a | a g a g a a a a g a |
| <b>rNDUFB1</b>     | 1469 | - - - - -           | - - - - -           | - - - - -           | - - - - -           | - - - - -           |
| alignment position | 2101 | . . . . .           | 2111                | . . . . .           | 2121                | . . . . .           |
| <b>P303789</b>     | 1002 | - - - - -           | - - - - -           | - - - - -           | - - - - -           | - - - - -           |
| <b>mNDUFB1</b>     | 1907 | g a g g a g g a g t | t a t t t a a c t g | t t t a c c t c c g | t a c a c a g g a g | a g a g a g t a g a |
| <b>rNDUFB1</b>     | 1469 | - - - - -           | - - - - -           | - - - - -           | - - - - -           | - - - - -           |
| alignment position | 2151 | . . . . .           | 2161                | . . . . .           | 2171                | . . . . .           |
| <b>P303789</b>     | 1002 | - - - - -           | - - - - -           | - - - - -           | - - - - -           | - - - - -           |
| <b>mNDUFB1</b>     | 1957 | a c a a a g a g a c | t t a a g c c t g a | t c a g g a t a c a | g a t t g t c t g g | g g a c             |
| <b>rNDUFB1</b>     | 1469 | - - - - -           | - - - - -           | - - - - -           | - - - - -           | - - - - -           |

**Pairwise similarities:**

For each pairwise alignment, the **similarity** (relative to the maximum similarity) and the **number of identical nucleic acids** (in % of shorter sequence) is given. Maximum values are underlined.

|                             | mNDUFBI<br>(2000 bp) | rNDUFBI<br>(1468 bp)        |
|-----------------------------|----------------------|-----------------------------|
| <b>P303789</b><br>(1001 bp) | 0.123<br>42 %        | 0.134<br>44 %               |
| <b>mNDUFBI</b><br>(2000 bp) |                      | <u>1.000</u><br><u>80 %</u> |

Please note that the **similarity value 1.000** marks only the two **most similar** sequences, it does not necessarily mean that these sequences are identical.

| Extract alignment region         |                                                     |
|----------------------------------|-----------------------------------------------------|
| <b>Positions in alignment</b>    | from: <input type="text"/> to: <input type="text"/> |
| <b>Output file</b>               | <input type="text" value="dialign.seq"/>            |
| <b>Extract aligned sequences</b> |                                                     |

For [comments](#), questions or bug reports, please contact [support@genomatix.de](mailto:support@genomatix.de)

[Genomatix-Logo](#)      [Logout](#)      [Personal](#)      [Messages](#)      [GEMS-Logo](#)  
[Logout](#)      [Personal](#)      [Messages](#)

---

[Genomatix Main](#) [GEMSEI](#) [Dorado](#) [Gene2Promoter](#) [BiblioSphere](#)  
[Frequently asked questions](#) [Your Results](#) [Your Sequences](#) [Your Protocol](#) [Help](#)

---

**GEMS Launcher Task: *DiAlign TF*: Multiple alignment plus TF sites working on promoters.seq (3 seq.)**

---

[\[Alignment\]](#)   [\[Pairwise similarities\]](#)

---

**DiAlign professional TF Release 3.1 December 2004** **Tue Jun 7 14:28:13 2005**

---

### Solution parameters:

**Sequence file:** [promoters.seq](#) (3 seq.)  
**Type of sequences:** nucleotide sequences  
**Threshold T:** 0.00  
**'\*' signs below alignment denote:** diagonal similarity (max. similarity is represented by 10 '\*' signs)  
**Alignment output:** complete alignment is shown  
# nucleic acids per line: 50  
**TF output:** common TF matches located in aligned regions (common to 3 (100.0 %) sequences)  
**Family matches:** yes  
**MatInspector library:** Matrix Family Library Version 5.0 (February 2005)  
**Selected groups** (core/matrix sim):  

- ALL user\_defined.lib (0.75/Optimized)
- ALL vertebrates.lib (0.75/Optimized)

---

### Aligned Sequences:

| No. | Sequence Name | Sequence Description                                                                                                                                                                                                                                                                       | Length  |
|-----|---------------|--------------------------------------------------------------------------------------------------------------------------------------------------------------------------------------------------------------------------------------------------------------------------------------------|---------|
| 1   | P914132       | sym=NDUFB2 loc=Loc4708 taxid=9606 spec=Homo sapiens chr=7 <br>ctg=NT_007914 str=(+) start=987533 end=988533 len=1001  tss=501  comm=NADH dehydrogenase (ubiquinone) 1 beta subcomplex, 2, 8kDa; (NM_004546/501/bronze;)                                                                    | 1001 bp |
| 2   | P914133       | sym=Ndufb2 loc=Loc68198 taxid=10090 spec=Mus musculus chr=6 <br>ctg=NT_039341 str=(+) start=8838279 end=8839314 len=1036  tss=501,503,510,536  comm=NADH dehydrogenase (ubiquinone) 1 beta subcomplex, 2; (AK028334/501/gold; AK007495/536/gold; AK010642/503/gold; NM_026612/510/bronze;) | 1036 bp |
| 3   | P914135       | sym=nalloc loc=Loc362344 taxid=10116 spec=Rattus norvegicus <br>chr=4 ctg=NW_047690 str=(+) start=309516 end=310516  len=1001 tss=501  comm=similar to NADH dehydrogenase (ubiquinone) 1 beta subcomplex, 2; (XM_342664/532/bronze;)                                                       | 1001 bp |

---

### Alignment (DiAlign format):

Please note that only **upper-case** letters are considered to be **aligned**. For more information, please have a look at the user guide.

V\$E4FF V\$E5TF V\$EGRF V\$WHZF V\$SF1F V\$STAF V\$P53F

```

alignment position      1 . . . . . 11 . . . . . 21 . . . . . 31 . . . . . 41 . . . . .
P914132      1 c c t g a g c c t a t g c c a a c c c a g c c t t a a a g c c a g t g g a t c g a a t c a a g c c a
P914133      1 a C C T C G A A T T G G C T A A G G C T C G A G G C G T T A G G A A C T T T c c c c C A T G T T C C
P914135      1 - C C C C G A A T G G T C T A A G G A T T A A G G C G T T A G A A A C C T T t a c t C A T A T T C C
    
```

|                    |                         |                     |                     |                     |                     |
|--------------------|-------------------------|---------------------|---------------------|---------------------|---------------------|
|                    | * * * * *               | * * * * *           | * * * * *           | * * * * *           | * * * * *           |
| alignment position | 5 1 . . . . .           | 6 1 . . . . .       | 7 1 . . . . .       | 8 1 . . . . .       | 9 1 . . . . .       |
| <b>P914132</b>     | 51 t t t g t g g c a t  | t a t c t - - - -   | - - - - -           | - - - - -           | - - - - -           |
| <b>P914133</b>     | 51 T G G C C G A C T T  | A T T C C G A G t g | t G C C G G G T T G | G G T T C C T C A G | G T G A T T C c c g |
| <b>P914135</b>     | 50 T G G C C G C C T T  | A T T C C A A G g a | g G C A G G G T T G | G G T T C C T C A G | G T G A C T C t g a |
|                    | * * * * *               | * * * * *           | * * * * *           | * * * * *           | * * * * *           |
|                    | * * * * *               | * * * * *           | * * * * *           | * * * * *           | * * * * *           |
| alignment position | 1 0 1 . . . . .         | 1 1 1 . . . . .     | 1 2 1 . . . . .     | 1 3 1 . . . . .     | 1 4 1 . . . . .     |
| <b>P914132</b>     | 66 - - - - -            | - - - - -           | - - - - -           | - - - - -           | - - - - -           |
| <b>P914133</b>     | 101 T G C C A C C A G T | C C A G G T T C T G | A A A T T T A A C A | C C c t g g c t g a | t t a g t c a - - - |
| <b>P914135</b>     | 100 T G C C A G C G G T | C C A C G T T C T G | A G A T T T A A C A | C C t g g c t g c t | g g t g a a t c a t |
|                    | * * * * *               | * * * * *           | * * * * *           | * * * * *           | * * * * *           |
|                    | * * * * *               | * * * * *           | * * * * *           | * * * * *           | * * * * *           |
| alignment position | 1 5 1 . . . . .         | 1 6 1 . . . . .     | 1 7 1 . . . . .     | 1 8 1 . . . . .     | 1 9 1 . . . . .     |
| <b>P914132</b>     | 66 - - - - -            | - - - - -           | - - - - -           | - - - - -           | - - - - -           |
| <b>P914133</b>     | 148 - - - - T T C A G   | A A C A A T G C T G | A A A C A A C G A t | g c t a t a a a a t | a a a c a t t g c g |
| <b>P914135</b>     | 150 c a g g t T T C A G | A A C A G T A C T G | G A A C A A C G A - | - - - - -           | - - - - -           |
|                    | * * * * *               | * * * * *           | * * * * *           | * * * * *           | * * * * *           |
|                    | * * * * *               | * * * * *           | * * * * *           | * * * * *           | * * * * *           |
| alignment position | 2 0 1 . . . . .         | 2 1 1 . . . . .     | 2 2 1 . . . . .     | 2 3 1 . . . . .     | 2 4 1 . . . . .     |
| <b>P914132</b>     | 66 - - - - -            | - - - - -           | - - - - -           | - - - - -           | - - - - -           |
| <b>P914133</b>     | 193 a T G T T A T A A A | A T A A A C A T T G | C G T G G T T C A G | A A A G G G C T T A | g G C C T T T A A C |
| <b>P914135</b>     | 179 - T G T T A T A A A | C T A A A C A T G G | C A T G G T T C A G | A A A G G A C T T A | - G C C T T T A A C |
|                    | * * * * *               | * * * * *           | * * * * *           | * * * * *           | * * * * *           |
|                    | * * * * *               | * * * * *           | * * * * *           | * * * * *           | * * * * *           |
|                    | * * * * *               | * * * * *           | * * * * *           | * * * * *           | * * * * *           |
|                    | * * * * *               | * * * * *           | * * * * *           | * * * * *           | * * * * *           |
| alignment position | 2 5 1 . . . . .         | 2 6 1 . . . . .     | 2 7 1 . . . . .     | 2 8 1 . . . . .     | 2 9 1 . . . . .     |
| <b>P914132</b>     | 94 A A T G C C t g t a  | a t c c c a g c t a | c t c g g g a a g t | t g a g g c a g g a | g a a t c g c t t g |
| <b>P914133</b>     | 243 A A G G G C C C A C | A G T G G C A - - - | - - - - -           | - - - - -           | - - - - -           |
| <b>P914135</b>     | 227 A A G G G C C C A C | A G T G G C A - - - | - - - - -           | - - - - -           | - - - - -           |
|                    | * * * * *               | * * * * *           | * * * * *           | * * * * *           | * * * * *           |
|                    | * * * * *               | * * * * *           | * * * * *           | * * * * *           | * * * * *           |
|                    | * * * * *               | * * * * *           | * * * * *           | * * * * *           | * * * * *           |
|                    | * * * * *               | * * * * *           | * * * * *           | * * * * *           | * * * * *           |
| alignment position | 3 0 1 . . . . .         | 3 1 1 . . . . .     | 3 2 1 . . . . .     | 3 3 1 . . . . .     | 3 4 1 . . . . .     |
| <b>P914132</b>     | 144 a g c c t g g g a g | g c a g a g g t t g | c a g t g a g c c g | a g a t g g t g t c | a c t g c a c t c c |
| <b>P914133</b>     | 260 - - - - -           | - - - - -           | - - - - -           | - - - - -           | - - - - -           |
| <b>P914135</b>     | 244 - - - - -           | - - - - -           | - - - - -           | - - - - -           | - - - - -           |
| alignment position | 3 5 1 . . . . .         | 3 6 1 . . . . .     | 3 7 1 . . . . .     | 3 8 1 . . . . .     | 3 9 1 . . . . .     |
| <b>P914132</b>     | 194 a g c c t g g g t g | a c a g a g c a a g | g c c t t g t c t c | a a a a a g a a a a | a a a a a a a a a   |
| <b>P914133</b>     | 260 - - - - -           | - - - - -           | - - - - -           | - - - - -           | - - - - -           |
| <b>P914135</b>     | 244 - - - - -           | - - - - -           | - - - - -           | - - - - -           | - - - - -           |
| alignment position | 4 0 1 . . . . .         | 4 1 1 . . . . .     | 4 2 1 . . . . .     | 4 3 1 . . . . .     | 4 4 1 . . . . .     |
| <b>P914132</b>     | 244 a a a a g a a t t a | t a c a c c a c t c | a g t t t t a g g a | g g g g c A G A A C | A C G g g g a g a g |
| <b>P914133</b>     | 260 - - - - -           | - - - - -           | - - - - -           | - - - - -           | - - - - -           |
| <b>P914135</b>     | 244 - - - - -           | - - - - -           | - - - - -           | - - - - -           | - - - - -           |







For each pairwise alignment, the **similarity** (relative to the maximum similarity) and the **number of identical nucleic acids** (in % of shorter sequence) is given. Maximum values are underlined.

|                                    | <b>P914133</b><br><b>(1036 bp)</b> | <b>P914135</b><br><b>(1001 bp)</b> |
|------------------------------------|------------------------------------|------------------------------------|
| <b>P914132</b><br><b>(1001 bp)</b> | 0.133<br>25 %                      | 0.139<br>27 %                      |
| <b>P914133</b><br><b>(1036 bp)</b> |                                    | <u>1.000</u><br><u>79 %</u>        |

Please note that the **similarity value 1.000** marks only the two **most similar** sequences, it does not necessarily mean that these sequences are identical.

| Extract alignment region         |                                                     |
|----------------------------------|-----------------------------------------------------|
| <b>Positions in alignment</b>    | from: <input type="text"/> to: <input type="text"/> |
| <b>Output file</b>               | <input type="text" value="dialign.seq"/>            |
| <b>Extract aligned sequences</b> |                                                     |

For [comments](#), questions or bug reports, please contact [support@genomatix.de](mailto:support@genomatix.de)



[Genomatix-Logo](#)
[Logout](#)
[Personal](#)
[Messages](#)
[GEMS-Logo](#)

[Genomatix Main](#)
[GEMSEI](#)
[Dorado](#)
[Gene2Promoter](#)
[BiblioSphere](#)  
[Frequently asked questions](#)
[Your Results](#)
[Your Sequences](#)
[Your Protocol](#)
[Help](#)

**GEMS Launcher Task: *DiAlign TF*: Multiple alignment plus TF sites working on promoters.seq (3 seq.)**

[\[Alignment\]](#)
[\[Pairwise similarities\]](#)

DiAlign professional TF Release 3.1 December 2004

Tue Jun 7 14:48:40 2005

**Solution parameters:**

**Sequence file:** [promoters.seq](#) (3 seq.)  
**Type of sequences:** nucleotide sequences  
**Threshold T:** 0.00  
**'\*' signs below alignment denote:** diagonal similarity (max. similarity is represented by 10 '\*' signs)  
**Alignment output:** complete alignment is shown  
 # nucleic acids per line: 50  
**TF output:** common TF matches located in aligned regions (common to 3 (100.0 %) sequences)  
**Family matches:** yes  
**MatInspector library:** Matrix Family Library Version 5.0 (February 2005)  
 • ALL user\_defined.lib (0.75/Optimized)  
 • ALL vertebrates.lib (0.75/Optimized)  
**Selected groups**  
 (core/matrix sim):

**Aligned Sequences:**

| No. | Sequence Name | Sequence Description                                                                                                                                                                                                                                                                  | Length  |
|-----|---------------|---------------------------------------------------------------------------------------------------------------------------------------------------------------------------------------------------------------------------------------------------------------------------------------|---------|
| 1   | P876211       | sym=NDUFB3 loc=Loc4709 taxid=9606 spec=Homo sapiens chr=2 ctg=NT_005403 str=(+) start=52145450 end=52146450 len=1001 tss=501 comm=NADH dehydrogenase (ubiquinone) 1 beta subcomplex, 3, 12kDa; (NM_002491/572/bronze;)                                                                | 1001 bp |
| 2   | P876212       | sym=Ndufb3 loc=Loc66495 taxid=10090 spec=Mus musculus chr=1 ctg=NT_039170 str=(+) start=36282125 end=36283164 len=1040 tss=501,506,518,540 comm=NADH dehydrogenase (ubiquinone) 1 beta subcomplex 3; (AK013608/761/gold; AK009008/783/gold; AK007930/749/gold; NM_025597/744/bronze;) | 1040 bp |
| 3   | P876213       | sym=nalloc loc=Loc301427 taxid=10116 spec=Rattus norvegicus chr=9 ctg=NW_047816 str=(+) start=681579 end=682579 len=1001 tss=501 comm=similar to NADH dehydrogenase (ubiquinone) 1 beta subcomplex 3; (XM_217400/645/bronze;)                                                         | 1001 bp |

**Alignment (DiAlign format):**

Please note that only **upper-case** letters are considered to be **aligned**. For more information, please have a look at the user guide.

VSHOXH
V\$TALE
V\$CMYB
V\$SEGRF
V\$NFLE
V\$NEUR
V\$ECAT
V\$PCAT
V\$AREB
V\$SETSF
V\$NRF2
V\$RORA  
VSHOXF

```

alignment position 1 . . . . . 11 . . . . . 21 . . . . . 31 . . . . . 41 . . . . .
P876211      1 c t t g c t e c c g c c t e t c e t c c e t e t c t g e t g g c g c c a c c g c a g c c c c a c g
P876212      1 - - - - - - - - - - - - - - - - - - - - - - - - - - - - - - - - - - - - - - - - - - - - - - - - - - - -
P876213      1 c - - - - - - - - - - - - - - - - - - - - - - - - - - - - - - - - - - - - - - - - - - - - - - - - - - - -
    
```









|                                                                                                                                        |                                   |                     |
|----------------------------------------------------------------------------------------------------------------------------------------|-----------------------------------|---------------------|
| <b>Output file</b>                                                                                                                     | dialign.seq                       |                     |
| <b>Extract aligned sequences</b>                                                                                                       |                                   |                     |
| For <a href="#">comments</a> , questions or bug reports, please contact <a href="mailto:support@genomatix.de">support@genomatix.de</a> |                                   |                     |
| © Genomatix Software GmbH 1998-2005<br>- All rights reserved.                                                                          | <a href="#">License Agreement</a> | GEMS Launcher 4.1.1 |

[Genomatix-Logo](#)      [Logout](#)      [Personal](#)      [Messages](#)      [GEMS-Logo](#)  
[Logout](#)      [Personal](#)      [Messages](#)

---

[Genomatix](#) [Main](#) [GEMSEI](#) [Dorado](#) [Gene2](#) [Promoter](#) [BiblioSphere](#)  
[Frequently asked questions](#) [Your Results](#) [Your Sequences](#) [Your Protocol](#) [Help](#)

---

**GEMS Launcher Task: *DiAlign TF*: Multiple alignment plus TF sites working on promoters.seq (3 seq.)**

---

[\[Alignment\]](#)   [\[Pairwise similarities\]](#)

DiAlign professional TF Release 3.1 December 2004

Tue Jun 7 15:09:12 2005

### Solution parameters:

**Sequence file:** [promoters.seq](#) (3 seq.)  
**Type of sequences:** nucleotide sequences  
**Threshold T:** 0.00  
**'\*' signs below alignment denote:** diagonal similarity (max. similarity is represented by 10 '\*' signs)  
**Alignment output:** complete alignment is shown  
# nucleic acids per line: 50  
**TF output:** common TF matches located in aligned regions (common to 3 (100.0 %) sequences)  
**Family matches:** yes  
**MatInspector library:** Matrix Family Library Version 5.0 (February 2005)

- ALL user\_defined.lib (0.75/Optimized)
- ALL vertebrates.lib (0.75/Optimized)

**Selected groups**  
(core/matrix sim):

### Aligned Sequences:

| No. | Sequence Name | Sequence Description                                                                                                                                                                                                            | Length  |
|-----|---------------|---------------------------------------------------------------------------------------------------------------------------------------------------------------------------------------------------------------------------------|---------|
| 1   | P914161       | sym=NDUFB4 loc=Loc4710 taxid=9606 spec=Homo sapiens chr=3 ctg=NT_005612 str=(+) start=26809774 end=26810774 len=1001 tss=501 comm=NADH dehydrogenase (ubiquinone) 1 beta subcomplex, 4, 15kDa; (NM_004547/501/silver;)          | 1001 bp |
| 2   | P914163       | sym=Ndufb4 loc=Loc68194 taxid=10090 spec=Mus musculus chr=16 ctg=NT_096987 str=(-) start=277661 end=277761 len=1001 tss=501 comm=NADH dehydrogenase (ubiquinone) 1 beta subcomplex 4; (AK009807/571/gold;NM_026610/571/bronze;) | 1001 bp |
| 3   | P914164       | sym=naloc=Loc288088 taxid=10116 spec=Rattus norvegicus chr=11 ctg=NW_047356 str=(+) start=18247379 end=18248379 len=1001 tss=501 comm=similar to NADH:ubiquinone oxidoreductase B15 subunit; (XM_213619/569/silver;)            | 1001 bp |

### Alignment (DiAlign format):

Please note that only **upper-case** letters are considered to be **aligned**. For more information, please have a look at the user guide.

V\$IRFF V\$NRFF V\$SRFF V\$SETSF V\$NRFF2 V\$SEREF V\$SEREF V\$RORA V\$TBPF

alignment position 1 . . . . . 11 . . . . . 21 . . . . . 31 . . . . . 41 . . . . .  
**P914161**      1 t t a a t g t t g t a t g a a t c t a g c a t g g t a a a g t a c a g a a a a g c t t a t t c t c t  
**P914163**      1 a - - - - -  
**P914164**      1 t g - - - - -

alignment position 51 . . . . . 61 . . . . . 71 . . . . . 81 . . . . . 91 . . . . .











## Extract aligned sequences

---

For [comments](#), questions or bug reports, please contact [support@genomatix.de](mailto:support@genomatix.de)

---

© Genomatix Software GmbH 1998-2005  
- All rights reserved.

[License Agreement](#)

GEMS Launcher 4.1.1

[Genomatix-Logo](#)      [Logout](#)      [Personal](#)      [Messages](#)      [GEMS-Logo](#)  
[Logout](#)      [Personal](#)      [Messages](#)

---

[Genomatix Main](#) [GEMSEI](#) [Dorado](#) [Gene2Promoter](#) [BiblioSphere](#)  
[Frequently asked questions](#) [Your Results](#) [Your Sequences](#) [Your Protocol](#) [Help](#)

---

**GEMS Launcher Task: *DiAlign TF*: Multiple alignment plus TF sites working on promoters.seq (3 seq.)**

---

[\[Alignment\]](#)   [\[Pairwise similarities\]](#)

---

**DiAlign professional TF Release 3.1 December 2004** **Tue Jun 7 15:22:31 2005**

---

### Solution parameters:

**Sequence file:** [promoters.seq](#) (3 seq.)  
**Type of sequences:** nucleotide sequences  
**Threshold T:** 0.00  
**'\*' signs below alignment denote:** diagonal similarity (max. similarity is represented by 10 '\*' signs)  
**Alignment output:** complete alignment is shown  
# nucleic acids per line: 50  
**TF output:** common TF matches located in aligned regions (common to 3 (100.0 %) sequences)  
**Family matches:** yes  
**MatInspector library:** Matrix Family Library Version 5.0 (February 2005)  
**Selected groups** (core/matrix sim):  

- ALL user\_defined.lib (0.75/Optimized)
- ALL vertebrates.lib (0.75/Optimized)

---

### Aligned Sequences:

| No. | Sequence Name | Sequence Description                                                                                                                                                                                                                                                                                                                  | Length     |
|-----|---------------|---------------------------------------------------------------------------------------------------------------------------------------------------------------------------------------------------------------------------------------------------------------------------------------------------------------------------------------|------------|
| 1   | P862298       | sym=NDUFB5 loc=Loc4711 taxid=9606 spec=Homo sapiens chr=3 <br>ctg=NT_005612 str=(+) start=85817233 end=85818233 len=1001  tss=501  comm=NADH<br>dehydrogenase (ubiquinone) 1 beta subcomplex, 5, 16kDa; (NM_002492/553/bronze;)                                                                                                       | 1001<br>bp |
| 2   | P862299       | sym=Ndufb5 loc=Loc66046 taxid=10090 spec=Mus musculus chr=3 <br>ctg=NT_039228 str=(+) start=3823115 end=3824123 len=1009  tss=501,503,508,509  comm=NADH<br>dehydrogenase (ubiquinone) 1 beta subcomplex, 5;<br>(AK013223/553/gold;AK088061/546/gold;AK002279/553/gold;<br>AK005521/553/gold;AK018562/548/gold;NM_025316/554/bronze;) | 1009<br>bp |
| 3   | P862300       | sym=nal loc=Loc294964 taxid=10116 spec=Rattus norvegicus <br>chr=2 ctg=NW_047625 str=(+) start=5303108 end=5304108  len=1001 tss=501  comm=similar to<br>NADH dehydrogenase (ubiquinone) 1 beta subcomplex, 5; NADH dehydrogenase (ubiquinone) 1 beta<br>subcomplex 5; (XM_215544/501/bronze;)                                        | 1001<br>bp |

---

### Alignment (DiAlign format):

Please note that only **upper-case** letters are considered to be **aligned**. For more information, please have a look at the user guide.

V\$YYIF V\$PCAT V\$SMAD V\$RARF V\$RORA V\$REF V\$SEREF V\$SIF

```

alignment position 1 . . . . . 11 . . . . . 21 . . . . . 31 . . . . . 41 . . . . .
P862298      1 c a t c t a c a a a c c c c a t a t a c t g t c t t g t c c a c a g c a g g c a g c a a c a a a t
P862299      1 - - - - - - - - - - - - - - - - - - - - - - - - - - - - - - - - - - - - - - - - - - - - - - - - -
P862300      1 t a g a g g a a g a a c a g g g t g c g c c a g g g t a g a c g a - - - - - - - - - - - - - - - - -
    
```





For each pairwise alignment, the **similarity** (relative to the maximum similarity) and the **number of identical nucleic acids** (in % of shorter sequence) is given. Maximum values are underlined.

|                             | <b>P862299</b><br>(1009 bp) | <b>P862300</b><br>(1001 bp) |
|-----------------------------|-----------------------------|-----------------------------|
| <b>P862298</b><br>(1001 bp) | 0.162<br>35 %               | 0.176<br>34 %               |
| <b>P862299</b><br>(1009 bp) |                             | <u>1.000</u><br><u>78 %</u> |

Please note that the **similarity value 1.000** marks only the two **most similar** sequences, it does not necessarily mean that these sequences are identical.

| Extract alignment region         |                                                     |
|----------------------------------|-----------------------------------------------------|
| <b>Positions in alignment</b>    | from: <input type="text"/> to: <input type="text"/> |
| <b>Output file</b>               | <input type="text" value="dialign.seq"/>            |
| <b>Extract aligned sequences</b> |                                                     |

For [comments](#), questions or bug reports, please contact [support@genomatix.de](mailto:support@genomatix.de)





|                    |                         |                        |                        |                        |                        |
|--------------------|-------------------------|------------------------|------------------------|------------------------|------------------------|
| alignment position | 51 . . . . .            | 61 . . . . .           | 71 . . . . .           | 81 . . . . .           | 91 . . . . .           |
| <b>P855688</b>     | 42 AA g c t a c t - -   | - - - - -              | - - - - -              | - - - - -              | - - - - -              |
| <b>mNDUFB6</b>     | 51 AA t a g a t t g t   | a g a a g t t a c t    | c c a g t t a t g a    | a t a g a a g g c t    | c a t t t a t g g c    |
| <b>P855691</b>     | 5 - - - - -             | - - - - -              | - - - - -              | - - - - -              | - - - - -              |
|                    | * *                     |                        |                        |                        |                        |
| alignment position | 101 . . . . .           | 111 . . . . .          | 121 . . . . .          | 131 . . . . .          | 141 . . . . .          |
| <b>P855688</b>     | 50 - - - - -            | - - - - -              | - - - - -              | - - - - -              | - - - - -              |
| <b>mNDUFB6</b>     | 101 a g t a g c a t a c | c a a t g c t t t a    | c a g t a c t a t a    | a g c t t t c c c a    | c t a a t c c t c t    |
| <b>P855691</b>     | 5 - - - - -             | - - - - -              | - - - - -              | - - - - -              | - - - - -              |
| alignment position | 151 . . . . .           | 161 . . . . .          | 171 . . . . .          | 181 . . . . .          | 191 . . . . .          |
| <b>P855688</b>     | 50 - - - - -            | - - - - -              | - - - - -              | - - - - -              | - - - - -              |
| <b>mNDUFB6</b>     | 151 a t t c t g a a a t | c t g g g a g g t g    | a t t t t t c a a t    | g t t t t g c t a t    | t a c a t a t c g t    |
| <b>P855691</b>     | 5 - - - - -             | - - - - -              | - - - - -              | - - - - -              | - - - - -              |
| alignment position | 201 . . . . .           | 211 . . . . .          | 221 . . . . .          | 231 . . . . .          | 241 . . . . .          |
| <b>P855688</b>     | 50 - - - - -            | - - - - -              | - - - - -              | - - - - -              | - - - - -              |
| <b>mNDUFB6</b>     | 201 g t t g t g a c g a | a t a t t c g t g c    | a c a c c c c t a c    | a a a t t t t t a c    | t g C C A T A C C T    |
| <b>P855691</b>     | 5 - - - - -             | - - - - -              | - - - - -              | - - - - -              | - C C A T A C C T      |
|                    |                         |                        |                        |                        | * * * * *<br>* * * * * |
| alignment position | 251 . . . . .           | 261 . . . . .          | 271 . . . . .          | 281 . . . . .          | 291 . . . . .          |
| <b>P855688</b>     | 50 - - - - -            | - - - - -              | - - - - -              | - - - - -              | - - - - -              |
| <b>mNDUFB6</b>     | 251 T T G G G A T G T C | T T A C A A A G T G    | G G c C G G C A G A    | A T C A A A G A G T    | G A G C G A G C C T    |
| <b>P855691</b>     | 13 C T G G G A T A T C  | T T A C A A A G T G    | G G a C G G C A G G    | A T C A A A G A G T    | G A G C C A G T C C    |
|                    | * * * * *<br>* * * * *  | * * * * *<br>* * * * * | * * * * *<br>* * * * * | * * * * *<br>* * * * * | * * * * *<br>* * * * * |
| alignment position | 301 . . . . .           | 311 . . . . .          | 321 . . . . .          | 331 . . . . .          | 341 . . . . .          |
| <b>P855688</b>     | 50 - - - - -            | - - - - -              | - - C T T T T C A      | C T A T T C C T G T    | A C A G A T G G A G    |
| <b>mNDUFB6</b>     | 301 A T G G A A G C C T | c C C A A A T A A G    | G T G C T C T T T A    | T T T C T G C A G T    | A C A G A G a g g g    |
| <b>P855691</b>     | 63 A T G T A A G C C T  | - C C A A A T A A G    | G T G C T C T T T A    | T T T C T G C A G T    | A C A G A G G A G G    |
|                    | * * * * *<br>* * * * *  | * * * * *<br>* * * * * | * * * * *<br>* * * * * | * * * * *<br>* * * * * | * * * * *<br>* * * * * |
| alignment position | 351 . . . . .           | 361 . . . . .          | 371 . . . . .          | 381 . . . . .          | 391 . . . . .          |
| <b>P855688</b>     | 77 G G A C A G A t g -  | A G A C A G C T G C    | C C A g g g c a c t    | t c A G C A G T T A    | C T G G C A T A G C    |
| <b>mNDUFB6</b>     | 351 a a g a A A A C C G | A G A T A G G C G C    | T C A A G A T T A C    | T t A G C G G T T      | A C G A A A G A G G    |
| <b>P855691</b>     | 112 G A A G A A A C C C | A G A T A G C T G C    | T C A A A G T C A C    | T t - - G A G T T      | A C T A A A G G G C    |
|                    | * * * * *<br>* * * * *  | * * * * *<br>* * * * * | * * * * *<br>* * * * * | * * * * *<br>* * * * * | * * * * *<br>* * * * * |
| alignment position | 401 . . . . .           | 411 . . . . .          | 421 . . . . .          | 431 . . . . .          | 441 . . . . .          |
| <b>P855688</b>     | 126 T G G G A T T T G A | A C T G G G A T G T    | A A c t a t t t t c    | a t a c a c T C T C    | T A G G T C A t t c    |
| <b>mNDUFB6</b>     | 401 T G G G A G C C A A | A T T C G G A C G C    | A A G T G - - - -      | - - - - - T C T C      | T C G G T C A A G -    |
| <b>P855691</b>     | 159 T G G G A G C T G A | A C T T G A A T G C    | A A T T G - - - -      | - - - - - T C T C      | T A G G T C A A G -    |
|                    | * * * * *<br>* * * * *  | * * * * *<br>* * * * * | * * * * *<br>* * * * * | * * * * *<br>* * * * * | * * * * *<br>* * * * * |
| alignment position | 451 . . . . .           | 461 . . . . .          | 471 . . . . .          | 481 . . . . .          | 491 . . . . .          |
| <b>P855688</b>     | 176 c A A G G T G G G A | g a g g c a a g c a    | a a t a a t t t t g    | a a t c t g g c c a    | g c a t a t t c a c    |
| <b>mNDUFB6</b>     | 439 - A A G a - - - G A | A T T C A A G G G G    | G C G A G G C A G A    | G G T T C G C T - -    | - - - - -              |
| <b>P855691</b>     | 197 - A A G G T G G G A | A T T C A A G C G G    | G C G G G C A G A      | G G T T C C C T - -    | - - - - -              |







```

P855688 1002 -----
mNDUFB6 1297 g t t a a a c t g g t c a g a a t t a a c t g a g a t c a c a g g c t g t g a t t t c a g t a t t t
P855691 1002 -----

alignment
position      1 4 5 1 . . . . . 1 4 6 1 . . . . . 1 4 7 1 . . . . . 1 4 8 1 . . . . . 1 4 9 1 . . . . .

P855688 1002 -----
mNDUFB6 1347 g a g a a c a c t t a c g c g g t g g g t a g g g t t g a g g t g c c a g a g a c t g g c c a g c t
P855691 1002 -----

alignment
position      1 5 0 1 . . . . . 1 5 1 1 . . . . . 1 5 2 1 . . . . . 1 5 3 1 . . . . . 1 5 4 1 . . . . .

P855688 1002 -----
mNDUFB6 1397 g g t a t a g t a c a g c c c a t g g g g t c g c a a c a g a a g a c a g g g t t c t a t t t g g
P855691 1002 -----

alignment
position      1 5 5 1 .

P855688 1002 - - - -
mNDUFB6 1447 t a t g c
P855691 1002 - - - -
    
```

**Pairwise similarities:**

For each pairwise alignment, the **similarity** (relative to the maximum similarity) and the **number of identical nucleic acids** (in % of shorter sequence) is given. Maximum values are underlined.

|                             | <b>mNDUFB6</b><br>(1451 bp) | <b>P855691</b><br>(1001 bp) |
|-----------------------------|-----------------------------|-----------------------------|
| <b>P855688</b><br>(1001 bp) | 0.208<br>37 %               | 0.260<br>40 %               |
| <b>mNDUFB6</b><br>(1451 bp) |                             | <u>1.000</u><br><u>80 %</u> |

Please note that the **similarity value 1.000** marks only the two **most similar** sequences, it does not necessarily mean that these sequences are identical.

| Extract alignment region         |                                                     |
|----------------------------------|-----------------------------------------------------|
| <b>Positions in alignment</b>    | from: <input type="text"/> to: <input type="text"/> |
| <b>Output file</b>               | <input type="text" value="dialign.seq"/>            |
| <b>Extract aligned sequences</b> |                                                     |

For [comments](#), questions or bug reports, please contact [support@genomatix.de](mailto:support@genomatix.de)

[Genomatix-Logo](#)
[Logout](#)
[Personal](#)
[Messages](#)
[GEMS-Logo](#)

[Genomatix Main](#)
[GEMSEI](#)
[Dorado](#)
[Gene2Promoter](#)
[BiblioSphere](#)  
[Frequently asked questions](#)
[Your Results](#)
[Your Sequences](#)
[Your Protocol](#)
[Help](#)

**GEMS Launcher Task: *DiAlign TF*: Multiple alignment plus TF sites working on promoters.seq (3 seq.)**

[\[Alignment\]](#)
[\[Pairwise similarities\]](#)

DiAlign professional TF Release 3.1 December 2004

Tue Jun 7 15:59:00 2005

**Solution parameters:**

**Sequence file:** [promoters.seq](#) (3 seq.)  
**Type of sequences:** nucleotide sequences  
**Threshold T:** 0.00  
**'\*' signs below alignment denote:** diagonal similarity (max. similarity is represented by 10 '\*' signs)  
**Alignment output:** complete alignment is shown  
 # nucleic acids per line: 50  
**TF output:** common TF matches located in aligned regions (common to 3 (100.0 %) sequences)  
**Family matches:** yes  
**MatInspector library:** Matrix Family Library Version 5.0 (February 2005)  
 • ALL user\_defined.lib (0.75/Optimized)  
 • ALL vertebrates.lib (0.75/Optimized)  
**Selected groups**  
 (core/matrix sim):

**Aligned Sequences:**

| No. | Sequence Name | Sequence Description                                                                                                                                                                                                                    | Length  |
|-----|---------------|-----------------------------------------------------------------------------------------------------------------------------------------------------------------------------------------------------------------------------------------|---------|
| 1   | P906353       | sym=NDUFB7 loc=Loc4713 taxid=9606 spec=Homo sapiens chr=19 ctg=NT_011295 str=(-) start=5945188 end=5946188 len=1001  tss=501  comm=NADH dehydrogenase (ubiquinone) 1 beta subcomplex, 7, 18kDa; (NM_004146/501/bronze;)                 | 1001 bp |
| 2   | P906354       | sym=Ndufb7 loc=Loc66916 taxid=10090 spec=Mus musculus chr=8 ctg=NT_078575 str=(+) start=8532757 end=8533760 len=1004  tss=501,504  comm=NADH dehydrogenase (ubiquinone) 1 beta subcomplex, 7; (AK002678/514/gold;NM_025843/511/bronze;) | 1004 bp |
| 3   | P906355       | sym=nalloc=Loc361385 taxid=10116 spec=Rattus norvegicus chr=19 ctg=NW_047534 str=(-) start=11544622 end=11545622  len=1001 tss=501  comm=similar to NADH dehydrogenase (ubiquinone) 1 beta subcomplex, 7; (XM_341664/507/bronze;)       | 1001 bp |

**Alignment (DiAlign format):**

Please note that only **upper-case** letters are considered to be **aligned**. For more information, please have a look at the user guide.

V\$E2FE
U\$NRF2
V\$OAZF
V\$HENI
V\$MINI
V\$CP2F
V\$E2FE
V\$NRF1
V\$NRF1

```

alignment position 1 . . . . . 1 1 . . . . . 2 1 . . . . . 3 1 . . . . . 4 1 . . . . .
P906353          1 - - - - - - - - - - - - - - - - - - - - - - - - - - - - - - - - GGC AAGAG AAT TT
P906354          1 c a c a c t a c g t a t g t g c a c t C A C A C C G A C A A A C C T A G G G A A A G T G T T T G G
P906355          1 a c a t g - - - - - - - - - - - - - - - - - - - - C A C A C C G A C A A A C C T A A G G A A A G T G T T T G G
    
```

```

*****
*****
*****
*****
alignment position 5 1 . . . . . 6 1 . . . . . 7 1 . . . . . 8 1 . . . . . 9 1 . . . . .
P906353 14 GAGCCAGGA GGTGGAGGCT GCAGTGa gcc g a g a t c g c g c c a a t a c a c t c
P906354 51 AAGTTCGAGT GTTGGAATG GTAGTGT ATA TCTGTGGGAA AGCACTTATC
P906355 36 AGGTTGGAGa GTTGGAAGTG a c AGTAT ATA T G C G T A G G A G A G C A C T T A T C
*****
*****
*****
*****
alignment position 1 0 1 . . . . . 1 1 1 . . . . . 1 2 1 . . . . . 1 3 1 . . . . . 1 4 1 . . . . .
P906353 64 c a g t c t g g g c g a c a g g t a c t g t g t c t - - - - - C C A A A A A C A A A A A A A T T
P906354 101 T A C C A T A T G C T A g g c c t g g G G G T C T A T C C T A A A A C C A G A A A A A A A A T T A
P906355 86 T G C C A T G T G C T A t - - - - - G T G T C T A T C C C A A C G C C A t t t t a t t a t t a t t
*****
*****
*****
alignment position 1 5 1 . . . . . 1 6 1 . . . . . 1 7 1 . . . . . 1 8 1 . . . . . 1 9 1 . . . . .
P906353 106 C T T A A A G t g a c t t t a t g c a a a a t t a c a t a c a t t a a c g a t a t a a t a g a t a t
P906354 151 A T T T A A G a a a a a - - - - - - - - - - - - - - - - - - - - - - - - - - - - - - - - - - - - -
P906355 130 a t t a t t a t t a t t a t t a t t a t t a t - - - - - - - - - - - - - - - - - - - - - - - - - - -
*****
alignment position 2 0 1 . . . . . 2 1 1 . . . . . 2 2 1 . . . . . 2 3 1 . . . . . 2 4 1 . . . . .
P906353 156 c g t g c c T T T T T T A A G A G A A A T T G A A T G T T T C A A A G A A A a a a c t t - - - -
P906354 165 - - - - - - - - - - - - - - - - - - - - - - - - - - - - - - - - - - - - - - - - - - - - - - -
P906355 153 - - - - - T A T T A T T A T A T T A T T A T T A T T A T T A G A A G A A A G G A G G G G G A G
*****
*****
*****
alignment position 2 5 1 . . . . . 2 6 1 . . . . . 2 7 1 . . . . . 2 8 1 . . . . . 2 9 1 . . . . .
P906353 202 - - - - - - - - - - - - - - - - - - - - - - - - - - - - - - - - - - - - - - - - - - - - - - -
P906354 181 G A A G A G G A A C G C G G A A G A T G G T T C - - - - - - - - - - - - - - - - - - - - - - - - - - -
P906355 197 G G G A A G G A A C G T G G A A T A T G G T T C a g T T G T A A A A T G c c t g c c a t g c g a t
*****
*****
*****
alignment position 3 0 1 . . . . . 3 1 1 . . . . . 3 2 1 . . . . . 3 3 1 . . . . . 3 4 1 . . . . .
P906353 226 t t t t a a t a t g t g c t t t a g c c t c g g g c t a c c a g a a g a g c c c c a g a t a g G G T
P906354 205 - - - - - - - - - - - - - - - - - - - - - - - - - - - - - - - - - - - - - - - - - - - - - - -
P906355 247 c g t g c t a g t c a - - - - - - - - - - - - - - - - - - - - - - - - - - - - - - - - - - - - -
*****
alignment position 3 5 1 . . . . . 3 6 1 . . . . . 3 7 1 . . . . . 3 8 1 . . . . . 3 9 1 . . . . .
P906353 276 C G A G G G A G G C C T C A G T C C C a c a c c g t c c c c t t c t g c c c c g c c c a g a t g g a
P906354 208 C C A G G G T G T C C A C A G T A C C C A T G T A t a c a c a t g t a t A C A G C A G G C T T G G T
P906355 258 - - - - - G T G T C C A C A G T A C C C A T G T A a - - - - - - - - - - - - - - - - - - - - - - - - -
*****
*****
*****
*****
alignment position 4 0 1 . . . . . 4 1 1 . . . . . 4 2 1 . . . . . 4 3 1 . . . . . 4 4 1 . . . . .
P906353 326 t t t c c a g - - - - - - - - - - - - - - - - - - - - - - - - - - - - - - - - - - - - - - - - -
P906354 258 G G C A C A C A T T T a T A A T C C T A G C A C T G G G C A G A G C A C A G G G A C c c t g c c a
P906355 293 G G C A C A C A T T T g T A A T C C T A G G A C T G G G T A G A G C A T A G G G A A C G C C - - - -
*****
*****
*****
*****
alignment position 4 5 1 . . . . . 4 6 1 . . . . . 4 7 1 . . . . . 4 8 1 . . . . . 4 9 1 . . . . .
P906353 347 - - - - - - - - - - - - - - - - - - - - - - - - - - - - - - - - - - - - - - - - - - - - - - -
P906354 308 c e t c e c e g c t t c e a c a c c c g c a c t c e t C C C T G C A A C T C C C T G G C C A G C C T
P906355 339 - - - - - - - - - - - - - - - - - - - - - - - - - - - - - - - - - - - - - - - - - - - - - - -

```









---

For [comments](#), questions or bug reports, please contact [support@genomatix.de](mailto:support@genomatix.de)

---

© Genomatix Software GmbH 1998-2005  
- All rights reserved.

[License Agreement](#)

GEMS Launcher 4.1.1





```

P927735 270 AACACTATAA CTCGAAATAT CAAATGAGt A GTAGCTTTGT TTTCTCTCCT
      * * * * *
      * * * * *
      * * * * *
alignment position 451 . . . . . 461 . . . . . 471 . . . . . 481 . . . . . 491 . . . . .
P927722 332 TCCCGCTTAT CCTTCc c a g c c t c t a t c c a a c c c t t g g c t t - - - - - C C C A
P927731 344 TGCTGTCTGT CCTg g c a c c - - - TCATCAG CCGCTCACCG TCCAGGC TCT
P927735 320 TGCTGGCTGT CTATCt t g g c a c t TCACCAG CCACTCACTG CGCAGGC TCT
      * * * * *
      * * * * *
      * * * * *
alignment position 501 . . . . . 511 . . . . . 521 . . . . . 531 . . . . . 541 . . . . .
P927722 376 ACTGCGTATT TAA- - - ACC CCGCCCCTGT TGAACCC t t c g g c t t t CTT
P927731 390 ACAGCATATT TAAa t a a AGC CCGCCCAGCT TGATGCC GGG A- - - - - CTT
P927735 370 ACAGCGTATT TAA- - - - AGC CCGTCCAGCT TGACACC CGG A- - - - - CTT
      * * * * *
      * * * * *
      * * * * *
alignment position 551 . . . . . 561 . . . . . 571 . . . . . 581 . . . . . 591 . . . . .
P927722 422 CACTCCCGGC TTCCTCCGTC A- C GTTTGGC CCGGCTC AGC CGCCGTGACA
P927731 434 CTGCGCTGGC TTCg g a g a t c g c C GTTTGGC CCGACTC AGC CACCGTGACC
P927735 410 CAGCGCTAGC TTCAACGATC G- C GTTTGTC CCc GCTC AGC CACCGTGACC
      * * * * *
      * * * * *
      * * * * *
alignment position 601 . . . . . 611 . . . . . 621 . . . . . 631 . . . . . 641 . . . . .
P927722 471 GGCCTTTGCG CATGTGCAGA a g g GAAACGT GAAGAAGGTG AAGATGGCGG
P927731 484 CGCCTTTGCG CATGTGCAGA g t - GAACCGC GGAGAAGGTG AAGATGGCTG
P927735 459 CGCCTTTGCG CATGTGC A c g g c a g c g t - C GGAGAAGGTG AAGATGGCGG
      * * * * *
      * * * * *
      * * * * *
alignment position 651 . . . . . 661 . . . . . 671 . . . . . 681 . . . . . 691 . . . . .
P927722 521 TGGCCAAGGC CGGGGTC TTG GGA GTCCAGT GGCTGCA AAG GGCATCCCGG
P927731 533 CCGCCCGGGC TGCGGCCCTG GGA GTCCGAT GGCTGCA GAG GACAACCCGG
P927735 508 CGTCCCAGGC TGCGGCCCTG GGA GTCCGGT GGCTGCA AAG GGCATCCCGc
      * * * * *
      * * * * *
      * * * * *
alignment position 701 . . . . . 711 . . . . . 721 . . . . . 731 . . . . . 741 . . . . .
P927722 571 a a CGTGATGC CGCTGGGCGC ACG GACAGGT CCGCg a g a c g g g c g a g a c c
P927731 583 g GCGTGGTGC CACTGGA GGC ACG GAGAGGT CTGCACG- - - - -
P927735 558 t GCGTGGTGC CACTTGA GGC ACG GAGAGGT CTGCACG- - - - -
      * * * * *
      * * * * *
      * * * * *
alignment position 751 . . . . . 761 . . . . . 771 . . . . . 781 . . . . . 791 . . . . .
P927722 621 t c a GTGTGGG AAGGGGGTAC CTGAAATTTG GTGTATC GGG AGGg g g g a t c

```

|                    |     |                     |                     |                     |                   |                   |           |                   |           |           |           |           |           |           |           |           |           |           |           |           |           |           |           |           |           |           |           |           |           |           |           |           |           |           |           |           |
|--------------------|-----|---------------------|---------------------|---------------------|-------------------|-------------------|-----------|-------------------|-----------|-----------|-----------|-----------|-----------|-----------|-----------|-----------|-----------|-----------|-----------|-----------|-----------|-----------|-----------|-----------|-----------|-----------|-----------|-----------|-----------|-----------|-----------|-----------|-----------|-----------|-----------|-----------|
| <b>P927731</b>     | 620 | - - - GTGTGGG       | AAGCGGG             | TGC                 | CTG               | AAGTTA            | CTGCTTC   | GGG               | ATGGAGG   | CAT       |           |           |           |           |           |           |           |           |           |           |           |           |           |           |           |           |           |           |           |           |           |           |           |           |           |           |
| <b>P927735</b>     | 595 | - - - GTGTGGG       | AAGCGGG             | TGC                 | CTG               | ATGTTG            | CTGCTTC   | GGG               | AGGGAGG   | CAT       |           |           |           |           |           |           |           |           |           |           |           |           |           |           |           |           |           |           |           |           |           |           |           |           |           |           |
|                    |     | * * * * *           | * * * * *           | * * * * *           | * * * * *         | * * * * *         | * * * * * | * * * * *         | * * * * * | * * * * * |           |           |           |           |           |           |           |           |           |           |           |           |           |           |           |           |           |           |           |           |           |           |           |           |           |           |
|                    |     | * * * * *           | * * * * *           | * * * * *           | * * * * *         | * * * * *         | * * * * * | * * * * *         | * * * * * | * * * * * |           |           |           |           |           |           |           |           |           |           |           |           |           |           |           |           |           |           |           |           |           |           |           |           |           |           |
|                    |     | * * * * *           | * * * * *           | * * * * *           | * * * * *         | * * * * *         | * * * * * | * * * * *         | * * * * * | * * * * * |           |           |           |           |           |           |           |           |           |           |           |           |           |           |           |           |           |           |           |           |           |           |           |           |           |           |
|                    |     | * * * * *           | * * * * *           | * * * * *           | * * * * *         | * * * * *         | * * * * * | * * * * *         | * * * * * | * * * * * |           |           |           |           |           |           |           |           |           |           |           |           |           |           |           |           |           |           |           |           |           |           |           |           |           |           |
|                    |     | * * * * *           | * * * * *           | * * * * *           | * * * * *         | * * * * *         | * * * * * | * * * * *         | * * * * * | * * * * * |           |           |           |           |           |           |           |           |           |           |           |           |           |           |           |           |           |           |           |           |           |           |           |           |           |           |
|                    |     | * * * * *           | * * * * *           | * * * * *           | * * * * *         | * * * * *         | * * * * * | * * * * *         | * * * * * | * * * * * |           |           |           |           |           |           |           |           |           |           |           |           |           |           |           |           |           |           |           |           |           |           |           |           |           |           |
|                    |     | * * * * *           | * * * * *           | * * * * *           | * * * * *         | * * * * *         | * * * * * | * * * * *         | * * * * * | * * * * * |           |           |           |           |           |           |           |           |           |           |           |           |           |           |           |           |           |           |           |           |           |           |           |           |           |           |
| alignment position |     | 8 0 1 . . . . .     | 8 1 1 . . . . .     | 8 2 1 . . . . .     | 8 3 1 . . . . .   | 8 4 1 . . . . .   |           |                   |           |           |           |           |           |           |           |           |           |           |           |           |           |           |           |           |           |           |           |           |           |           |           |           |           |           |           |           |
| <b>P927722</b>     | 671 | g t a g a t g c c g | c g g c g g c a g c | c t c c g g g t a g | GGAGTGG           | AGG               | TGGCGTT   | GAT               |           |           |           |           |           |           |           |           |           |           |           |           |           |           |           |           |           |           |           |           |           |           |           |           |           |           |           |           |
| <b>P927731</b>     | 667 | CCTT - - - - -      | - - - - -           | - - - - -           | GGGACGG           | TGG               | CGGAGGT   | GTC               |           |           |           |           |           |           |           |           |           |           |           |           |           |           |           |           |           |           |           |           |           |           |           |           |           |           |           |           |
| <b>P927735</b>     | 642 | CCTT - - - - -      | - - - - -           | - - - - -           | GGAATGG           | TGG               | CGT       | CGGT              | GTT       |           |           |           |           |           |           |           |           |           |           |           |           |           |           |           |           |           |           |           |           |           |           |           |           |           |           |           |
|                    |     | * * * *             |                     |                     | * * * * *         |                   | * * * * * | * * * * *         |           |           |           |           |           |           |           |           |           |           |           |           |           |           |           |           |           |           |           |           |           |           |           |           |           |           |           |           |
|                    |     | * * * *             |                     |                     | * * * * *         |                   | * * * * * | * * * * *         |           |           |           |           |           |           |           |           |           |           |           |           |           |           |           |           |           |           |           |           |           |           |           |           |           |           |           |           |
| alignment position |     | 8 5 1 . . . . .     | 8 6 1 . . . . .     | 8 7 1 . . . . .     | 8 8 1 . . . . .   | 8 9 1 . . . . .   |           |                   |           |           |           |           |           |           |           |           |           |           |           |           |           |           |           |           |           |           |           |           |           |           |           |           |           |           |           |           |
| <b>P927722</b>     | 721 | ATATCCAGAA          | A- ATGGG            | GTG                 | GAG               | GATCGCA           | CTGa      | t c c t - - - - - |           |           |           |           |           |           |           |           |           |           |           |           |           |           |           |           |           |           |           |           |           |           |           |           |           |           |           |           |
| <b>P927731</b>     | 691 | CTGGCTGGGG          | g t AAG             | GGGTG               | GGA               | GGTCGCG           | GTGG      | ATT               | CGT       | GTGCCA    | AAG       |           |           |           |           |           |           |           |           |           |           |           |           |           |           |           |           |           |           |           |           |           |           |           |           |           |
| <b>P927735</b>     | 666 | CTGCCTGGGG          | C- TGG              | GGGTG               | Gt a              | c a g t - - -     | - TGA     | ATT               | ACT       | GAGT      | CCA       | AAG       |           |           |           |           |           |           |           |           |           |           |           |           |           |           |           |           |           |           |           |           |           |           |           |           |
|                    |     | * * * * *           | * * * * *           | * * * * *           | * * * * *         | * * * * *         | * * * * * | * * * * *         | * * * * * | * * * * * | * * * * * |           |           |           |           |           |           |           |           |           |           |           |           |           |           |           |           |           |           |           |           |           |           |           |           |           |
|                    |     | * * * * *           | * * * * *           | * * * * *           | * * * * *         | * * * * *         | * * * * * | * * * * *         | * * * * * | * * * * * | * * * * * |           |           |           |           |           |           |           |           |           |           |           |           |           |           |           |           |           |           |           |           |           |           |           |           |           |
| alignment position |     | 9 0 1 . . . . .     | 9 1 1 . . . . .     | 9 2 1 . . . . .     | 9 3 1 . . . . .   | 9 4 1 . . . . .   |           |                   |           |           |           |           |           |           |           |           |           |           |           |           |           |           |           |           |           |           |           |           |           |           |           |           |           |           |           |           |
| <b>P927722</b>     | 758 | - - - - -           | - - - - -           | - - - - -           | GCGA              | AGT               | CCCG      | GGC               | T         | CGGACC    | TCT       |           |           |           |           |           |           |           |           |           |           |           |           |           |           |           |           |           |           |           |           |           |           |           |           |           |
| <b>P927731</b>     | 741 | AAGGGATACA          | GGGT                | GC                  | Tg t              | a                 | GT        | CCG               | CAA       | GGT       | GCGA      | AAC       | g a       | CAGCC     | TCT       |           |           |           |           |           |           |           |           |           |           |           |           |           |           |           |           |           |           |           |           |           |
| <b>P927735</b>     | 711 | AAGGAATACA          | AGGT                | GC                  | Ta t              | -                 | GT        | TCG               | CCA       | GGT       | GCGG      | AAC       | AGCA      | ACC       | TCT       |           |           |           |           |           |           |           |           |           |           |           |           |           |           |           |           |           |           |           |           |           |
|                    |     | * * * * *           | * * * * *           | * * * * *           | * * * * *         | * * * * *         | * * * * * | * * * * *         | * * * * * | * * * * * | * * * * * | * * * * * | * * * * * | * * * * * | * * * * * |           |           |           |           |           |           |           |           |           |           |           |           |           |           |           |           |           |           |           |           |           |
|                    |     | * * * * *           | * * * * *           | * * * * *           | * * * * *         | * * * * *         | * * * * * | * * * * *         | * * * * * | * * * * * | * * * * * | * * * * * | * * * * * | * * * * * | * * * * * |           |           |           |           |           |           |           |           |           |           |           |           |           |           |           |           |           |           |           |           |           |
| alignment position |     | 9 5 1 . . . . .     | 9 6 1 . . . . .     | 9 7 1 . . . . .     | 9 8 1 . . . . .   | 9 9 1 . . . . .   |           |                   |           |           |           |           |           |           |           |           |           |           |           |           |           |           |           |           |           |           |           |           |           |           |           |           |           |           |           |           |
| <b>P927722</b>     | 782 | GCAGCCCTG           | CGACT               | TGA                 | AAG               | CCT               | T-        | CG                | Ga        | g         | c         | g         | c         | t         | g         | g         | a         | g         | c         | g         | g         | c         | t         | - - -     |           |           |           |           |           |           |           |           |           |           |           |           |
| <b>P927731</b>     | 791 | GCAGTCACTG          | CGGCT               | TAG                 | TG                | CTT               | T-        | CT                | GGG       | TGG       | GCG       | C         | T         | A         | AAG       | CAC       | C         | G         | T         | G         |           |           |           |           |           |           |           |           |           |           |           |           |           |           |           |           |
| <b>P927735</b>     | 760 | GCAGTTACTG          | CAGCT               | TAG                 | TG                | CTT               | Tt        | CT                | GGG       | TGG       | G         | T         | G         | T         | C         | T         | A         | AAG       | A         | C         | C         | G         | T         | A         |           |           |           |           |           |           |           |           |           |           |           |           |
|                    |     | * * * * *           | * * * * *           | * * * * *           | * * * * *         | * * * * *         | * * * * * | * * * * *         | * * * * * | * * * * * | * * * * * | * * * * * | * * * * * | * * * * * | * * * * * | * * * * * | * * * * * | * * * * * | * * * * * | * * * * * | * * * * * | * * * * * | * * * * * | * * * * * |           |           |           |           |           |           |           |           |           |           |           |           |
|                    |     | * * * * *           | * * * * *           | * * * * *           | * * * * *         | * * * * *         | * * * * * | * * * * *         | * * * * * | * * * * * | * * * * * | * * * * * | * * * * * | * * * * * | * * * * * | * * * * * | * * * * * | * * * * * | * * * * * | * * * * * | * * * * * | * * * * * | * * * * * | * * * * * |           |           |           |           |           |           |           |           |           |           |           |           |
| alignment position |     | 1 0 0 1 . . . . .   | 1 0 1 1 . . . . .   | 1 0 2 1 . . . . .   | 1 0 3 1 . . . . . | 1 0 4 1 . . . . . |           |                   |           |           |           |           |           |           |           |           |           |           |           |           |           |           |           |           |           |           |           |           |           |           |           |           |           |           |           |           |
| <b>P927722</b>     | 828 | CGCTTCTGAC          | CTGTT               | CT                  | CTT               | CTG               | CGt       | T                 | C         | T         | A         | G         | C         | C         | T         | C         | C         | A         | C         | A         | G         | G         | A         |           |           |           |           |           |           |           |           |           |           |           |           |           |
| <b>P927731</b>     | 840 | TCCATCTGAC          | CTGCA               | T                   | C                 | C                 | T         | CTG               | CG-       | T         | C         | C         | A         | G         | C         | C         | T         | T         | C         | C         | A         | T         | A         |           |           |           |           |           |           |           |           |           |           |           |           |           |
| <b>P927735</b>     | 810 | CCCATCTAAC          | CTGCT               | T                   | C                 | C                 | T         | CTG               | TG-       | T         | C         | C         | A         | G         | C         | C         | T         | T         | C         | C         | A         | T         | A         |           |           |           |           |           |           |           |           |           |           |           |           |           |
|                    |     | * * * * *           | * * * * *           | * * * * *           | * * * * *         | * * * * *         | * * * * * | * * * * *         | * * * * * | * * * * * | * * * * * | * * * * * | * * * * * | * * * * * | * * * * * | * * * * * | * * * * * | * * * * * | * * * * * | * * * * * | * * * * * | * * * * * | * * * * * |           |           |           |           |           |           |           |           |           |           |           |           |           |
|                    |     | * * * * *           | * * * * *           | * * * * *           | * * * * *         | * * * * *         | * * * * * | * * * * *         | * * * * * | * * * * * | * * * * * | * * * * * | * * * * * | * * * * * | * * * * * | * * * * * | * * * * * | * * * * * | * * * * * | * * * * * | * * * * * | * * * * * | * * * * * |           |           |           |           |           |           |           |           |           |           |           |           |           |
|                    |     | * * * * *           | * * * * *           | * * * * *           | * * * * *         | * * * * *         | * * * * * | * * * * *         | * * * * * | * * * * * | * * * * * | * * * * * | * * * * * | * * * * * | * * * * * | * * * * * | * * * * * | * * * * * | * * * * * | * * * * * | * * * * * | * * * * * | * * * * * |           |           |           |           |           |           |           |           |           |           |           |           |           |
|                    |     | * * * * *           | * * * * *           | * * * * *           | * * * * *         | * * * * *         | * * * * * | * * * * *         | * * * * * | * * * * * | * * * * * | * * * * * | * * * * * | * * * * * | * * * * * | * * * * * | * * * * * | * * * * * | * * * * * | * * * * * | * * * * * | * * * * * | * * * * * |           |           |           |           |           |           |           |           |           |           |           |           |           |
| alignment position |     | 1 0 5 1 . . . . .   | 1 0 6 1 . . . . .   | 1 0 7 1 . . . . .   | 1 0 8 1 . . . . . | 1 0 9 1 . . . . . |           |                   |           |           |           |           |           |           |           |           |           |           |           |           |           |           |           |           |           |           |           |           |           |           |           |           |           |           |           |           |
| <b>P927722</b>     | 878 | CATGTTCCCG          | GGGc                | c                   | c                 | T                 | A         | T                 | C         | T         | A         | G         | G         | A         | C         | C         | C         | C         | A         | G         | A         | A         | G         | A         | A         | C         | G         | G         | C         | C         | G         | C         | C         | G         |           |           |
| <b>P927731</b>     | 889 | CATGTTCCCG          | GGG                 | T                   | C                 | A                 | T         | C                 | T         | A         | G         | G         | A         | C         | C         | C         | C         | A         | G         | A         | G         | A         | A         | G         | A         | A         | C         | G         | G         | C         | C         | G         | C         | C         | G         |           |
| <b>P927735</b>     | 859 | CATGATCCCG          | GGG                 | T                   | C                 | A                 | T         | C                 | T         | A         | G         | G         | A         | C         | C         | C         | C         | A         | G         | A         | G         | A         | A         | G         | A         | A         | C         | G         | G         | C         | C         | G         | C         | C         | G         |           |
|                    |     | * * * * *           | * * * * *           | * * * * *           | * * * * *         | * * * * *         | * * * * * | * * * * *         | * * * * * | * * * * * | * * * * * | * * * * * | * * * * * | * * * * * | * * * * * | * * * * * | * * * * * | * * * * * | * * * * * | * * * * * | * * * * * | * * * * * | * * * * * | * * * * * | * * * * * | * * * * * | * * * * * | * * * * * | * * * * * | * * * * * | * * * * * | * * * * * | * * * * * | * * * * * | * * * * * |           |
|                    |     | * * * * *           | * * * * *           | * * * * *           | * * * * *         | * * * * *         | * * * * * | * * * * *         | * * * * * | * * * * * | * * * * * | * * * * * | * * * * * | * * * * * | * * * * * | * * * * * | * * * * * | * * * * * | * * * * * | * * * * * | * * * * * | * * * * * | * * * * * | * * * * * | * * * * * | * * * * * | * * * * * | * * * * * | * * * * * | * * * * * | * * * * * | * * * * * | * * * * * | * * * * * | * * * * * | * * * * * |
|                    |     | * * * * *           | * * * * *           | * * * * *           | * * * * *         | * * * * *         | * * * * * | * * * * *         | * * * * * | * * * * * | * * * * * | * * * * * | * * * * * | * * * * * | * * * * * | * * * * * | * * * * * | * * * * * | * * * * * | * * * * * | * * * * * | * * * * * | * * * * * | * * * * * | * * * * * | * * * * * | * * * * * | * * * * * | * * * * * | * * * * * | * * * * * | * * * * * | * * * * * | * * * * * | * * * * * | * * * * * |
|                    |     | * * * * *           | * * * * *           | * * * * *           | * * * * *         | * * * * *         | * * * * * | * * * * *         | * * * * * | * * * * * | * * * * * | * * * * * | * * * * * | * * * * * | * * * * * | * * * * * | * * * * * | * * * * * | * * * * * | * * * * * | * * * * * | * * * * * | * * * * * | * * * * * | * * * * * | * * * * * | * * * * * | * * * * * | * * * * * | * * * * * | * * * * * | * * * * * | * * * * * | * * * * * | * * * * * | * * * * * |
| alignment position |     | 1 1 0 1 . . . . .   | 1 1 1 1 . . . . .   | 1 1 2 1 . . . . .   | 1 1 3 1 . . . . . | 1 1 4 1 . . . . . |           |                   |           |           |           |           |           |           |           |           |           |           |           |           |           |           |           |           |           |           |           |           |           |           |           |           |           |           |           |           |





[Logout](#)    [Personal](#)    [Messages](#)

[Genomatix-Logo](#)    [Logout](#)    [Personal](#)    [Messages](#)    [GEMS-Logo](#)

---

[Genomatix Main](#) [GEMSEI](#) [Dorado](#) [Gene2Promoter](#) [BiblioSphere](#)  
[Frequently asked questions](#) [Your Results](#) [Your Sequences](#) [Your Protocol](#) [Help](#)

---

**GEMS Launcher Task: *DiAlign TF*: Multiple alignment plus TF sites working on promoters.seq (3 seq.)**

[\[Alignment\]](#)    [\[Pairwise similarities\]](#)

---

DiAlign professional TF Release 3.1 December 2004
Tue Jun 7 17:05:45 2005

---

### Solution parameters:

**Sequence file:** [promoters.seq](#) (3 seq.)  
**Type of sequences:** nucleotide sequences  
**Threshold T:** 0.00  
**'\*' signs below alignment denote:** diagonal similarity (max. similarity is represented by 10 '\*' signs)  
**Alignment output:** complete alignment is shown  
# nucleic acids per line: 50  
**TF output:** common TF matches located in aligned regions (common to 3 (100.0 %) sequences)  
**Family matches:** yes  
**MatInspector library:** Matrix Family Library Version 5.0 (February 2005)

- ALL user\_defined.lib (0.75/Optimized)
- ALL vertebrates.lib (0.75/Optimized)

**Selected groups**  
(core/matrix sim):

---

### Aligned Sequences:

| No. | Sequence Name | Sequence Description                                                                                                                                                                                                                                                                                        | Length  |
|-----|---------------|-------------------------------------------------------------------------------------------------------------------------------------------------------------------------------------------------------------------------------------------------------------------------------------------------------------|---------|
| 1   | P922003       | sym=NDUFB9 loc=Loc4715 taxid=9606 spec=Homo sapiens chr=8 ctg=NT_008046 str=(+) start=38769028 end=38770040 len=1013 tss=501,513 comm=NADH dehydrogenase (ubiquinone) 1 beta subcomplex, 9, 22kDa; (AK026538/513/gold;NM_005005/501/silver;)                                                                | 1013 bp |
| 2   | P922004       | sym=Ndufb9 loc=Loc66218 taxid=10090 spec=Mus musculus chr=15 ctg=NT_039621 str=(+) start=20271682 end=20272682 len=1001 tss=501 comm=NADH dehydrogenase (ubiquinone) 1 beta subcomplex, 9; (AK003540/601/gold;NM_023172/601/bronze;)                                                                        | 1001 bp |
| 3   | P922005       | sym=nalloc loc=Loc299954 taxid=10116 spec=Rattus norvegicus chr=7 ctg=NW_047779 str=(-) start=13034523 end=13035523 len=1001 tss=501 comm=similar to NADH dehydrogenase (ubiquinone) 1 beta subcomplex, 9, 22kDa; NADH dehydrogenase (ubiquinone) 1 beta subcomplex, 9 (22kD, B22); (XM_216929/577/bronze;) | 1001 bp |

---

### Alignment (DiAlign format):

Please note that only **upper-case** letters are considered to be **aligned**. For more information, please have a look at the user guide.

V\$ECAT
V\$EISF
V\$NRF2
V\$STAF
V\$TBPF
V\$ZF5F
V\$OCT1

```

alignment position 1 . . . . . 1 1 . . . . . 2 1 . . . . . 3 1 . . . . . 4 1 . . . . .
P922003      1 g a t a t g a a c g a a t g a a t g c t t g a g t g a a t t g g t c c c c a g a a g c g g t c a g c
P922004      1 t a g a - - - - - - - - - - - - - - - - - - - - - - - - - - - - - - - - - - - - - - - - - - - - - -
P922005      1 - - - - - - - - - - - - - - - - - - - - - - - - - - - - - - - - - - - - - - - - - - - - - -
    
```

|                    |                         |                     |                     |                     |                     |
|--------------------|-------------------------|---------------------|---------------------|---------------------|---------------------|
| alignment position | 5 1 . . . . .           | 6 1 . . . . .       | 7 1 . . . . .       | 8 1 . . . . .       | 9 1 . . . . .       |
| <b>P922003</b>     | 51 c t c t c c g c c a  | a g g c a g a g g G | GA AGG CCGG         | GAGG TGC ACG        | t g g g a t g a a t |
| <b>P922004</b>     | 5 - - - - -             | - - - - -           | - - - - -           | AGAG TTC ACG        | AAA GAC A - -       |
| <b>P922005</b>     | 1 - - - - -             | - - - - -           | G GG AGG AGGG       | AGGG TTC ACG        | AAAT ACC - - -      |
|                    |                         |                     | * * * * *           | * * * * *           | * * * * *           |
| alignment position | 1 0 1 . . . . .         | 1 1 1 . . . . .     | 1 2 1 . . . . .     | 1 3 1 . . . . .     | 1 4 1 . . . . .     |
| <b>P922003</b>     | 101 g GAAAC ATAG        | TGATTGGC c t        | t t t t g g a g - - | - - - - - TTT       | TCTTCTT a a a       |
| <b>P922004</b>     | 22 - GAAGAAAAG          | TGATTGGC t T        | GGGGGCGGT           | GCTT T t t g a g    | a g a - - - - -     |
| <b>P922005</b>     | 29 - GGAGAAATAG         | TGATTAGC- T         | GGGGGCGGT           | GCTT T c t TTT      | TCTTTT t g g        |
|                    | * * * * *               | * * * * *           | * * * * *           | * * * * *           | * * * * *           |
| alignment position | 1 5 1 . . . . .         | 1 6 1 . . . . .     | 1 7 1 . . . . .     | 1 8 1 . . . . .     | 1 9 1 . . . . .     |
| <b>P922003</b>     | 142 a a a c t g a a t a | c a t t a c a g a t | g t - - - - -       | - - - - -           | - - - - -           |
| <b>P922004</b>     | 64 - - - TGGGAG         | GAC TCG GGG A       | CT AGCCCATG         | CTAGGC g a t c      | AGTCTACGGC          |
| <b>P922005</b>     | 77 g t g TGGGAG         | GAC TCG GGG A       | TT AGCCCATG         | CTAGGC - - -        | AGTCTACC GC         |
|                    | * * * * *               | * * * * *           | * * * * *           | * * * * *           | * * * * *           |
| alignment position | 2 0 1 . . . . .         | 2 1 1 . . . . .     | 2 2 1 . . . . .     | 2 3 1 . . . . .     | 2 4 1 . . . . .     |
| <b>P922003</b>     | 164 - - - - -           | - - - - -           | - - - - -           | - - - - -           | - - - - -           |
| <b>P922004</b>     | 110 T G a a GCACAC      | CCC ACA CCT A       | TT CCTCTCTT         | TCCA GTT GAA        | T T a a a c ACAC    |
| <b>P922005</b>     | 123 T G t c GCACAT      | CCC ACA CCT A       | T ACCTCTATT         | TTCA GTT GAA        | T T - - - ACAC      |
|                    | * * * * *               | * * * * *           | * * * * *           | * * * * *           | * * * * *           |
| alignment position | 2 5 1 . . . . .         | 2 6 1 . . . . .     | 2 7 1 . . . . .     | 2 8 1 . . . . .     | 2 9 1 . . . . .     |
| <b>P922003</b>     | 164 - TGAAAACAG         | CAC AAa a a t c     | a t a a c t g t a c | g GCT TGT TAA       | T T T T T A C A A A |
| <b>P922004</b>     | 160 A C A A A A A A A G | CAC AAG T C a c     | a a t g a t t c a t | TGCC CGG GAA        | T G C T C A T A A A |
| <b>P922005</b>     | 169 A T A A A A A A T G | CAC AAG T C c a     | a t t a - - - - -   | TGCT CGT GAA        | T T C T C A T A A A |
|                    | * * * * *               | * * * * *           | * * * * *           | * * * * *           | * * * * *           |
| alignment position | 3 0 1 . . . . .         | 3 1 1 . . . . .     | 3 2 1 . . . . .     | 3 3 1 . . . . .     | 3 4 1 . . . . .     |
| <b>P922003</b>     | 213 T AAATACACC         | CTC GTG AAT C       | CA g a a CCTAG      | ATCA AGA ACC        | AGAG CA - - -       |
| <b>P922004</b>     | 210 T GAACATGCA         | CTA GGG AAA C       | CAT - - CCTCC       | AGCA AGA ACC        | AGATCA GT CA        |
| <b>P922005</b>     | 213 T CAATATGCA         | TTC GGG AA c t      | CAT - - CCTCG       | AGCA AAA ACC        | AGATCA AT CA        |
|                    | * * * * *               | * * * * *           | * * * * *           | * * * * *           | * * * * *           |
| alignment position | 3 5 1 . . . . .         | 3 6 1 . . . . .     | 3 7 1 . . . . .     | 3 8 1 . . . . .     | 3 9 1 . . . . .     |
| <b>P922003</b>     | 259 T TACCAGCAC         | c c a g a a a c c t | c c c c g c g c c c | t c c t c c a c t g | a g c g g c C C T T |
| <b>P922004</b>     | 258 T TGCCAGCAC         | g CG AGG CCT C      | CGGGCAT - - -       | - - - - -           | - - - - - C T T C   |
| <b>P922005</b>     | 261 T CGCCAGCAC         | t CG AGG CCT C      | CGGGAAT - - -       | - - - - -           | - - - - - C T T C   |
|                    | * * * * *               | * * * * *           | * * * * *           | * * * * *           | * * * * *           |
| alignment position | 4 0 1 . . . . .         | 4 1 1 . . . . .     | 4 2 1 . . . . .     | 4 3 1 . . . . .     | 4 4 1 . . . . .     |
| <b>P922003</b>     | 309 T CAACCCTTA         | CAA TGC CGG A       | GGGCGCAAt t         | c c t g g t c c t   | g t g a c c t t g g |
| <b>P922004</b>     | 289 CGTGCCCTGG          | AAA g GC CAT G      | CC GCGAAAAG         | GG - - - - -        | - - - - -           |
| <b>P922005</b>     | 292 T GTACCCTGG         | AAA AGC CAA G       | CC GCGAAAAG         | GG - - - - -        | - - - - -           |
|                    | * * * * *               | * * * * *           | * * * * *           | * * * * *           | * * * * *           |
| alignment position | 4 5 1 . . . . .         | 4 6 1 . . . . .     | 4 7 1 . . . . .     | 4 8 1 . . . . .     | 4 9 1 . . . . .     |
| <b>P922003</b>     | 359 t g a c e g a c GC  | CCG GGA CAA G       | TC AGAAAGAC         | CCAAGGG CGT         | GG A AAA C g CT     |
| <b>P922004</b>     | 321 - - - - - GA        | CCC GGG ACT G       | TC AGCGAGGC         | TCAC GAC CAA        | GAC AAA C - CT      |







© Genomatix Software GmbH 1998-2005  
- All rights reserved.

[License Agreement](#)

GEMS Launcher 4.1.1

[Genomatix-Logo](#)      [Logout](#)      [Personal](#)      [Messages](#)      [GEMS-Logo](#)  
[Logout](#)      [Personal](#)      [Messages](#)

[Genomatix Main](#) [GEMSEI](#) [Dorado](#) [Gene2Promoter](#) [BiblioSphere](#)  
[Frequently asked questions](#) [Your Results](#) [Your Sequences](#) [Your Protocol](#) [Help](#)

**GEMS Launcher Task: *DiAlign TF*: Multiple alignment plus TF sites working on promoters.seq (3 seq.)**

[\[Alignment\]](#)   [\[Pairwise similarities\]](#)

DiAlign professional TF Release 3.1 December 2004

Tue Jun 7 17:18:57 2005

**Solution parameters:**

**Sequence file:** [promoters.seq](#) (3 seq.)  
**Type of sequences:** nucleotide sequences  
**Threshold T:** 0.00  
**'\*' signs below alignment denote:** diagonal similarity (max. similarity is represented by 10 '\*' signs)  
**Alignment output:** complete alignment is shown  
# nucleic acids per line: 50  
**TF output:** common TF matches located in aligned regions (common to 3 (100.0 %) sequences)  
**Family matches:** yes  
**MatInspector library:** Matrix Family Library Version 5.0 (February 2005)  

- ALL user\_defined.lib (0.75/Optimized)
- ALL vertebrates.lib (0.75/Optimized)

**Selected groups**  
(core/matrix sim):

**Aligned Sequences:**

| No. | Sequence Name | Sequence Description                                                                                                                                                                                                                                                                                    | Length  |
|-----|---------------|---------------------------------------------------------------------------------------------------------------------------------------------------------------------------------------------------------------------------------------------------------------------------------------------------------|---------|
| 1   | P914197       | sym=NDUFB10 loc=Loc4716 taxid=9606 spec=Homo sapiens chr=16 ctg=NT_037887 str=(+) start=1949020 end=1950020 len=1001 tss=501 comm=NADH dehydrogenase (ubiquinone) 1 beta subcomplex, 10, 22kDa; (NM_004548/526/silver;)                                                                                 | 1001 bp |
| 2   | P914198       | sym=Ndufb10 loc=Loc68342 taxid=10090 spec=Mus musculus chr=17 ctg=NT_039649 str=(-) start=1254142 end=1255239 len=1098 tss=501,598 comm=NADH dehydrogenase (ubiquinone) 1 beta subcomplex, 10; (AK002517/598/gold;XM_128594/501/bronze;)                                                                | 1098 bp |
| 3   | P914199       | sym=nalloc=Loc287121 taxid=10116 spec=Rattus norvegicus chr=10 ctg=NW_047334 str=(-) start=802694 end=803694 len=1001 tss=501 comm=similar to NADH dehydrogenase (ubiquinone) 1 beta subcomplex, 10, 22kDa; NADH dehydrogenase (ubiquinone) 1 beta subcomplex, 10 (22kD, PDSW); (XM_213242/534/bronze;) | 1001 bp |

**Alignment (DiAlign format):**

Please note that only **upper-case** letters are considered to be **aligned**. For more information, please have a look at the user guide.

```

V$OAZF V$STAF V$NRF1 V$NNM5 V$PAX5 V$TEAF V$EBOX V$HESF V$HIF1 V$PAX1
alignment position 1 . . . . . 11 . . . . . 21 . . . . . 31 . . . . . 41 . . . . .
P914197      1 c c t c c c c - - - - -
P914198      1 g c t g t t t c t t a g c c c c t a a c t c t g g c a g g a g g t g a c c a g c a c c t a g a t g a
P914199      1 - - - - -
    
```





```

P914197 206 TCCCTGCTg c a c t c a g c a c a g t g c c t g g c g c g c a g t g g g a a c c g a a t g a c
P914198 344 TCCCTGCTAT CTTAGCTGGT AGGT CAGG GC AAAGCATT t c a g c c a t t - -
P914199 319 TCCCTGCTAT CTTAGCTGGT AGGT CAGG GC AAAGCATT t c g t g c a c t t g
*****
*****
*****
*****
*****
*****
*****
*****
*****
*****
alignment position 5 5 1 . . . . . 5 6 1 . . . . . 5 7 1 . . . . . 5 8 1 . . . . . 5 9 1 . . . . .
P914197 256 c c c c t c c t a t t c c t t a t g t c a g t t g c c t t t t g t c t g t t t c t t t c a t c g t a
P914198 392 - TGGTGATCT TTGTCCA ACT - - - - - - - - - - - - - - - - - - - - - - - - - - - - - - - - -
P914199 369 g TGATGATCT CTGTCCA ACT - - - - - - - - - - - - - - - - - - - - - - - - - - - - - - - - -
*****
*****
alignment position 6 0 1 . . . . . 6 1 1 . . . . . 6 2 1 . . . . . 6 3 1 . . . . . 6 4 1 . . . . .
P914197 306 a g c a g g a a t c t g t c c g g t t c g c g g c t g c t t c c c a g g c g c c c a g a c c a g c g
P914198 411 - - - - - - - - - - - - - - - - - - - - - - - - - - - - - - - - - - - - - - - - - - - - - - -
P914199 389 - - - - - - - - - - - - - - - - - - - - - - - - - - - - - - - - - - - - - - - - - - - - - - -
*****
*****
alignment position 6 5 1 . . . . . 6 6 1 . . . . . 6 7 1 . . . . . 6 8 1 . . . . . 6 9 1 . . . . .
P914197 356 a c c a g c a c c g c g t a g g c g c t c g g c a c A G A C C G A G A A C G G A - - - - - - - - - -
P914198 411 - - - - - - - - - - - - - - - - - - - - - - - - - - - - - - - - - - - - - - - - - - - - - - -
P914199 389 - - - - - - - - - - - - - - - - - - - - - - - - - - - - - - - - - - - - - - - - - - - - - - -
*****
*****
*****
alignment position 7 0 1 . . . . . 7 1 1 . . . . . 7 2 1 . . . . . 7 3 1 . . . . . 7 4 1 . . . . .
P914197 396 - GGCCCCACG CGGGGGCGCC Ct g c g g c g a g g c g g g t c c c g g c c g c g c c c g
P914198 435 g GGACCACA AGGGGGTGCT CGAG A - - - - - - - - - - - - - - - - - - - - - - - - - - - -
P914199 403 - GAAACCACA AGGGGGTGCC a GAG A - - - - - - - - - - - - - - - - - - - - - - - - - - - -
*****
*****
*****
*****
*****
*****
alignment position 7 5 1 . . . . . 7 6 1 . . . . . 7 7 1 . . . . . 7 8 1 . . . . . 7 9 1 . . . . .
P914197 445 g c g g a g c c GG GGA A C T A C A A g T C C C A T G G T G C A T C G C G G C - G - C C A G C G C
P914198 460 - - - - - - - - - - GG C G A A C C A C T A - T C C C A T G G T G C C T C G C G G C T G C C C A C T A C
P914199 427 - - - - - - - - - - GG C G A A C C A C A A - T C C C A T G G T A C C T C G C G G C T G - C C A C T A C
*****
*****
*****
*****
*****
*****
*****
*****
*****
*****
*****
alignment position 8 0 1 . . . . . 8 1 1 . . . . . 8 2 1 . . . . . 8 3 1 . . . . . 8 4 1 . . . . .
P914197 493 GCAGGCGCAG CCGCCTTCG g c g t c c t c t g - - - - - - - - - - - - - - - - - - - - - T
P914198 501 GCAGGCGCAG CTGt c a c CTT TCTGCGCAGG C GTAGAGGTC CC GCGT CCT T
P914199 467 GCAGGCGCAG CTGCCTTCTT TCTGCGCAGG C GTAGAGGTC CC GCGT CCT T
*****
*****
*****
*****
*****
*****
*****
*****
*****
*****
*****
alignment position 8 5 1 . . . . . 8 6 1 . . . . . 8 7 1 . . . . . 8 8 1 . . . . . 8 9 1 . . . . .
P914197 523 AGCGGGCgac c t a g g c c g c g g g a c c c g g a c g g a g g t a g a g g c c a g g g C A G
P914198 551 AGCGGGCC - - - - - - - - - - - - - - - - - - - - - - - - - - - - - - - - - C A G
P914199 517 AGCaGGCC - - - - - - - - - - - - - - - - - - - - - - - - - - - - - - - - - G A G
*****
*****
*****
*****
*****
*****
*****
*****
*****
*****
*****
alignment position 9 0 1 . . . . . 9 1 1 . . . . . 9 2 1 . . . . . 9 3 1 . . . . . 9 4 1 . . . . .
P914197 573 CGCGTCCGGG AGCGGAGt c c g c g c c g c c g c c - - - - - - - - - - - - - - - - - - - - -
P914198 562 CGGATCCGGA CGTGGAGCGA GTAG AAGGTC G Gt g g g a g a GT TTGCTTAA
P914199 528 CCGACCCAGA CACAGAACGA GTGG AAGGTC C Gc a g g g - - - - - GT TCGCTTAA

```





| Extract alignment region  |                                                     |
|---------------------------|-----------------------------------------------------|
| Positions in alignment    | from: <input type="text"/> to: <input type="text"/> |
| Output file               | <input type="text" value="dialign.seq"/>            |
| Extract aligned sequences |                                                     |

For [comments](#), questions or bug reports, please contact [support@genomatix.de](mailto:support@genomatix.de)

© Genomatix Software GmbH 1998-2005  
- All rights reserved.

[License Agreement](#)

GEMS Launcher 4.1.1

[Genomatix-Logo](#)      [Logout](#)      [Personal](#)      [Messages](#)      [GEMS-Logo](#)  
[Logout](#)      [Personal](#)      [Messages](#)  
[Genomatix Main](#) [GEMSEI](#) [Dorado](#) [Gene2](#) [Promoter](#) [BiblioSphere](#)  
[Frequently asked questions](#) [Your Results](#) [Your Sequences](#) [Your Protocol](#) [Help](#)

---

**GEMS Launcher Task: *DiAlign TF*: Multiple alignment plus TF sites working on promoters.seq (3 seq.)**

[\[Alignment\]](#)   [\[Pairwise similarities\]](#)

DiAlign professional TF Release 3.1 December 2004

Tue Jun 7 17:53:39 2005

### Solution parameters:

**Sequence file:** [promoters.seq](#) (3 seq.)  
**Type of sequences:** nucleotide sequences  
**Threshold T:** 0.00  
**\*! signs below alignment denote:** diagonal similarity (max. similarity is represented by 10 '!\*' signs)  
**Alignment output:** complete alignment is shown  
# nucleic acids per line: 50  
**TF output:** common TF matches located in aligned regions (common to 3 (100.0 %) sequences)  
**Family matches:** yes  
**MatInspector library:** Matrix Family Library Version 5.0 (February 2005)  

- ALL user\_defined.lib (0.75/Optimized)
- ALL vertebrates.lib (0.75/Optimized)

**Selected groups**  
(core/matrix sim):

### Aligned Sequences:

| No. | Sequence Name | Sequence Description                                                                                                                                                                                         | Length  |
|-----|---------------|--------------------------------------------------------------------------------------------------------------------------------------------------------------------------------------------------------------|---------|
| 1   | P961889       | sym=P17.3 loc=Loc54539 taxid=9606 spec=Homo sapiens chr=XI<br>ctg=NT_079573 str=(-) start=9853400 end=9854746 len=1347  tss=501,847  comm=neuronal protein 17.3; (AK000501/847/gold;NM_019056/501/silver;)   | 1347 bp |
| 2   | P961890       | sym=Np15 loc=Loc104130 taxid=10090 spec=Mus musculus chr=XI<br>ctg=NT_039700 str=(-) start=13827557 end=13828828 len=1272  tss=501,772  comm=nuclear protein 15.6; (AK028121/815/gold;NM_019435/544/silver;) | 1272 bp |
| 3   | P961891       | sym=nalloc=Loc299310 taxid=10116 spec=Rattus norvegicus <br>chr=XI ctg=NW_048034 str=(+) start=486187 end=487187  len=1001 tss=501  comm=similar to neuronal protein 15.6; (XM_216785/541/bronze;)           | 1001 bp |

### Alignment (DiAlign format):

Please note that only **upper-case** letters are considered to be **aligned**. For more information, please have a look at the user guide.

V\$TALE V\$AIRE V\$CDEF V\$PAX3 V\$ECAT V\$PCAT V\$COMP V\$PBXC V\$GLIF V\$TBPF V\$GKLF V\$LEFF  
V\$IRFF V\$SNAP V\$SPIF V\$E2FF V\$ZBPF V\$EGRE

```

alignment position      1 . . . . . 1 1 . . . . . 2 1 . . . . . 3 1 . . . . . 4 1 . . . . .
P961889      1 g t c c c c g c c c c g g g c c c c t t a c c t c c g c c c c c a c g a c c a g c g t e g a C G C T
P961890      1 - - - - - - - - - - - - - - - - - - - - - - - - - - - - - - - - - - - - - - - - - - - - - - - - -
P961891      1 g - - - - - - - - - - - - - - - - - - - - - - - - - - - - - - - - - - - - - - - - - - - - - - - - -
    
```







|                    |     |                    |                    |                    |                 |                   |                  |                  |
|--------------------|-----|--------------------|--------------------|--------------------|-----------------|-------------------|------------------|------------------|
| <b>P961890</b>     | 447 | <b>CT TGCTGTCC</b> | <b>TTTGAAGTTG</b>  | <b>AAAGACAAC T</b> | AGAAGCTCCA      | CCTCTTTC          | CC               |                  |
| <b>P961891</b>     | 450 | <b>CT TGCTGTCC</b> | <b>TTTGAAGTTG</b>  | <b>AAAGACAAG T</b> | AGAAGCTCCA      | CCTCTTTC          | CC               |                  |
|                    |     | * * * * *          | * * * * *          | * * * * *          | * * * * *       | * * * * *         | * * * * *        |                  |
|                    |     | * * * * *          | * * * * *          | * * * * *          | * * * * *       | * * * * *         | * * * * *        |                  |
|                    |     | * * * * *          | * * * * *          | * * * * *          | * * * * *       | * * * * *         | * * * * *        |                  |
|                    |     | * * * * *          | * * * * *          | * * * * *          | * * * * *       | * * * * *         | * * * * *        |                  |
|                    |     | * * * * *          | * * * * *          | * * * * *          | * * * * *       | * * * * *         | * * * * *        |                  |
|                    |     | * * * * *          | * * * * *          | * * * * *          | * * * * *       | * * * * *         | * * * * *        |                  |
|                    |     | * * * * *          | * * * * *          | * * * * *          | * * * * *       | * * * * *         | * * * * *        |                  |
| alignment position |     | 5 5 1 . . . . .    | 5 6 1 . . . . .    | 5 7 1 . . . . .    | 5 8 1 . . . . . | 5 9 1 . . . . .   |                  |                  |
| <b>P961889</b>     | 541 | CAGTGGGCGa         | gggaactcgg         | ggcgattggc         | tgggaactgt      | atccacccaa        |                  |                  |
| <b>P961890</b>     | 497 | TACAGGGCc          | aTCTAG-            | - - - -            | - - - -         | - - - -           | - - - -          |                  |
| <b>P961891</b>     | 500 | TACAGGGCGg         | TCTAG-             | - - - -            | - - - -         | - - - -           | - - - -          |                  |
|                    |     | * * * * *          | * * * * *          |                    |                 |                   |                  |                  |
|                    |     | * * * * *          | * * * * *          |                    |                 |                   |                  |                  |
|                    |     | * * * * *          | * * * * *          |                    |                 |                   |                  |                  |
|                    |     | * * * * *          | * * * * *          |                    |                 |                   |                  |                  |
| alignment position |     | 6 0 1 . . . . .    | 6 1 1 . . . . .    | 6 2 1 . . . . .    | 6 3 1 . . . . . | 6 4 1 . . . . .   |                  |                  |
| <b>P961889</b>     | 591 | ATGTCACCGA         | T <b>TTCTTCCTA</b> | <b>TGCAGGAAAT</b>  | GAGCAGACCc      | aTCAATAAGA        |                  |                  |
| <b>P961890</b>     | 512 | ATGTCACCGC         | T <b>TTCTTCCTA</b> | <b>CGAAGAAAAAT</b> | GAACAGACCT      | CTCAAAAAACA       |                  |                  |
| <b>P961891</b>     | 515 | ATGTCACCGC         | T <b>TTCTTCCTA</b> | <b>TGAAGAAAAAT</b> | GAACAGACCT      | CTTAAAAACA        |                  |                  |
|                    |     | * * * * *          | * * * * *          | * * * * *          | * * * * *       | * * * * *         |                  |                  |
|                    |     | * * * * *          | * * * * *          | * * * * *          | * * * * *       | * * * * *         |                  |                  |
|                    |     | * * * * *          | * * * * *          | * * * * *          | * * * * *       | * * * * *         |                  |                  |
|                    |     | * * * * *          | * * * * *          | * * * * *          | * * * * *       | * * * * *         |                  |                  |
|                    |     | * * * * *          | * * * * *          | * * * * *          | * * * * *       | * * * * *         |                  |                  |
|                    |     | * * * * *          | * * * * *          | * * * * *          | * * * * *       | * * * * *         |                  |                  |
|                    |     | * * * * *          | * * * * *          | * * * * *          | * * * * *       | * * * * *         |                  |                  |
| alignment position |     | 6 5 1 . . . . .    | 6 6 1 . . . . .    | 6 7 1 . . . . .    | 6 8 1 . . . . . | 6 9 1 . . . . .   |                  |                  |
| <b>P961889</b>     | 641 | AATTTCTCa          | g cctggc           | cgaa aatggt        | tggc cccacga    | agc c acgaca      | aact             |                  |
| <b>P961890</b>     | 562 | ACTCTCTCC          | AGACTAACAG         | AAAtgATAAC         | GT TGATT        | CGG T             | AGCGACACG        |                  |
| <b>P961891</b>     | 565 | AATTTCTTCC         | AGCCTAACAG         | AAAc aATAAA        | GC TAAAT        | CGA T             | TGCGACGCG        |                  |
|                    |     | * * * * *          | * * * * *          | * * * * *          | * * * * *       | * * * * *         | * * * * *        |                  |
|                    |     | * * * * *          | * * * * *          | * * * * *          | * * * * *       | * * * * *         | * * * * *        |                  |
|                    |     | * * * * *          | * * * * *          | * * * * *          | * * * * *       | * * * * *         | * * * * *        |                  |
| alignment position |     | 7 0 1 . . . . .    | 7 1 1 . . . . .    | 7 2 1 . . . . .    | 7 3 1 . . . . . | 7 4 1 . . . . .   |                  |                  |
| <b>P961889</b>     | 691 | - - - - GGAGG      | CAA Aga            | gggt tgc           | TCAACGC         | CCCGCCT           | CAT TGGAAAAC     | CA               |
| <b>P961890</b>     | 612 | GC GTGGGAGG        | CAA AAT            | AGAG - - -         | TCCGCAC         | CTCGCCGAAC        | T                | CGTAAACAA        |
| <b>P961891</b>     | 615 | GC GTGGAAGG        | t AA AAT           | AGAG - - -         | TCCACAC         | CTCGCCACAC        | T                | CGAAAACAA        |
|                    |     | * * * * *          | * * * * *          | * * * * *          | * * * * *       | * * * * *         | * * * * *        | * * * * *        |
|                    |     | * * * * *          | * * * * *          | * * * * *          | * * * * *       | * * * * *         | * * * * *        | * * * * *        |
|                    |     | * * * * *          | * * * * *          | * * * * *          | * * * * *       | * * * * *         | * * * * *        | * * * * *        |
| alignment position |     | 7 5 1 . . . . .    | 7 6 1 . . . . .    | 7 7 1 . . . . .    | 7 8 1 . . . . . | 7 9 1 . . . . .   |                  |                  |
| <b>P961889</b>     | 736 | AATCAGa            | t c t GGGACCTATA   | TAGCGT             | <b>GCGG</b>     | <b>GAGGCGGGGC</b> | <b>GAtgat</b>    | <b>gTC</b>       |
| <b>P961890</b>     | 659 | ACTTAGg            | CCG GGGATCTATT     | TAGCAAGGT          | <b>A</b>        | <b>AGGCGGAGC</b>  | <b>GACAAAAa</b>  | <b>TC</b>        |
| <b>P961891</b>     | 662 | ACTTAa             | a CCC GGGATCTATT   | TAGCGA             | <b>GGA</b>      | <b>AGGCGGAGT</b>  | <b>GACAAAAt</b>  | <b>TC</b>        |
|                    |     | * * * * *          | * * * * *          | * * * * *          | * * * * *       | * * * * *         | * * * * *        | * * * * *        |
|                    |     | * * * * *          | * * * * *          | * * * * *          | * * * * *       | * * * * *         | * * * * *        | * * * * *        |
|                    |     | * * * * *          | * * * * *          | * * * * *          | * * * * *       | * * * * *         | * * * * *        | * * * * *        |
|                    |     | * * * * *          | * * * * *          | * * * * *          | * * * * *       | * * * * *         | * * * * *        | * * * * *        |
| alignment position |     | 8 0 1 . . . . .    | 8 1 1 . . . . .    | 8 2 1 . . . . .    | 8 3 1 . . . . . | 8 4 1 . . . . .   |                  |                  |
| <b>P961889</b>     | 786 | <b>GCGCTCG</b>     | CAC CCACTGCAGC     | TGCGCACAg          | t cgcatt        | <b>tctt</b>       | <b>t - - - -</b> | <b>CCC</b>       |
| <b>P961890</b>     | 709 | <b>GCGCTGG</b>     | GAT CAACCGCAGC     | TGCGCACAT          | T               | GTATTTCCg         | t                | <b>CTCCCTCCC</b> |



```

***
alignment
position      1 1 0 1 . . . . . 1 1 1 1 . . . . . 1 1 2 1 . . . . . 1 1 3 1 . . . . . 1 1 4 1 . . . . .
P961889 1074 g c g g g g g g g g g g g g g g g g g g t a g t g g g g a c g g a a c c c c g a a g g g g t c a g t c
P961890 1003 g g a g g g g g - - - - - - - - - - - - - - - - - - - - - - - - - - - - - - - - - - - - - - - - - - - -
P961891 1002 - - - - - - - - - - - - - - - - - - - - - - - - - - - - - - - - - - - - - - - - - - - - - - - - - - - -

alignment
position      1 1 5 1 . . . . . 1 1 6 1 . . . . . 1 1 7 1 . . . . . 1 1 8 1 . . . . . 1 1 9 1 . . . . .
P961889 1124 c g g g a t c G G C A G A T G G G G C G C T G T A G A G G A C G T T C T t a g g c a g t a - - - -
P961890 1010 - - - - - G G A A A A C G G G A C G C T G T A G G G G C C A A T C T g g a c c a g g g a a a c c
P961891 1002 - - - - - - - - - - - - - - - - - - - - - - - - - - - - - - - - - - - - - - - - - - - - - - - - - - - -
          * * * * * * * * * * * * * * * * * * * * * * * * * * * * * * * * * * * * * * * * * * * * * * * * * * * *

alignment
position      1 2 0 1 . . . . . 1 2 1 1 . . . . . 1 2 2 1 . . . . . 1 2 3 1 . . . . . 1 2 4 1 . . . . .
P961889 1169 - - - - - - - - - - - - - - - - - - - - - - - G A G G A C T G C G C G G C C G G C G A A A G
P961890 1053 a g t g t c a a a g c g g a c a t t c t c c g g c c c G A G A T T T G A G C A G T G G A C A A A A T
P961891 1002 - - - - - - - - - - - - - - - - - - - - - - - - - - - - - - - - - - - - - - - - - - - - - - - - - - - -
          * * * * * * * * * * * * * * * * * * * * * * * * * * * * * * * * * * * * * * * * * * * * * * * * * * * *

alignment
position      1 2 5 1 . . . . . 1 2 6 1 . . . . . 1 2 7 1 . . . . . 1 2 8 1 . . . . . 1 2 9 1 . . . . .
P961889 1192 C C T A G A A G A C T t g g g A A T T T T G C C T A C C T T G T G T T C C T C C T T T G T c t c t c
P961890 1103 C T T C G A A T A T T c a g a A A T T T T G C C T A G C T T G T T T T T C T C T T T C G T t g c c t
P961891 1002 - - - - - - - - - - - - - - - - - - - - - - - - - - - - - - - - - - - - - - - - - - - - - - - - - - - -
          * * * * * * * * * * * * * * * * * * * * * * * * * * * * * * * * * * * * * * * * * * * * * * * * * * * *

alignment
position      1 3 0 1 . . . . . 1 3 1 1 . . . . . 1 3 2 1 . . . . . 1 3 3 1 . . . . . 1 3 4 1 . . . . .
P961889 1242 g g t a t c t t c g t t c c a g g g c c a g a g g c a g g a t t g g t t t t a t T T T G C A G A C A
P961890 1153 t a - - - - - - - - - - - - - - - - - - - - - - - - - - - - - - - - - - - - - - - - - - - - - - - - - - - -
P961891 1002 - - - - - - - - - - - - - - - - - - - - - - - - - - - - - - - - - - - - - - - - - - - - - - - - - - - -
          * * * * * * * * * * * * * * * * * * * * * * * * * * * * * * * * * * * * * * * * * * * * * * * * * * * *

alignment
position      1 3 5 1 . . . . . 1 3 6 1 . . . . . 1 3 7 1 . . . . . 1 3 8 1 . . . . . 1 3 9 1 . . . . .
P961889 1292 G A A A T C A C A C c t c A A G T G G A C A G C G C T C A A A A C A C G T T A G A A G C A G T A T A
P961890 1165 G A A A T C A C A C t g a A A G A G G G C A G C A C C C A A A G C A T G T T A G A A A C T T T A T A
P961891 1002 - - - - - - - - - - - - - - - - - - - - - - - - - - - - - - - - - - - - - - - - - - - - - - - - - - - -
          * * * * * * * * * * * * * * * * * * * * * * * * * * * * * * * * * * * * * * * * * * * * * * * * * * * *

alignment
position      1 4 0 1 . . . . . 1 4 1 1 . . . . . 1 4 2 1 . . . . . 1 4 3 1 . . . . . 1 4 4 1 . . . . .
P961889 1342 G T a c a a - - - - - - - - - - - - - - - - - - - - - - - - - - - - - - - - - - - - - - - - - - - - - -
P961890 1215 A T t a g g g t a a t a c t a a a c t c t a a g g t a a c a c g t g c a t a a t g c c a g g c t g t
P961891 1002 - - - - - - - - - - - - - - - - - - - - - - - - - - - - - - - - - - - - - - - - - - - - - - - - - - - -
          * *

alignment
position      1 4 5 1 . . . . .
P961889 1348 - - - - - - -
P961890 1265 g c t a g a c a
P961891 1002 - - - - - - -
    
```

**Pairwise similarities:**

For each pairwise alignment, the **similarity** (relative to the maximum similarity) and the **number of identical nucleic acids** (in % of shorter sequence) is given. Maximum values are underlined.

|  |                             |                             |
|--|-----------------------------|-----------------------------|
|  | <b>P961890</b><br>(1272 bp) | <b>P961891</b><br>(1001 bp) |
|--|-----------------------------|-----------------------------|

|                             |               |                             |
|-----------------------------|---------------|-----------------------------|
| <b>P961889</b><br>(1347 bp) | 0.488<br>59 % | 0.481<br>67 %               |
| <b>P961890</b><br>(1272 bp) |               | <u>1.000</u><br><u>89 %</u> |

Please note that the **similarity value 1.000** marks only the two **most similar** sequences, it does not necessarily mean that these sequences are identical.

| Extract alignment region  |                                                     |
|---------------------------|-----------------------------------------------------|
| Positions in alignment    | from: <input type="text"/> to: <input type="text"/> |
| Output file               | <input type="text" value="dialign.seq"/>            |
| Extract aligned sequences |                                                     |

For [comments](#), questions or bug reports, please contact [support@genomatix.de](mailto:support@genomatix.de)

© Genomatix Software GmbH 1998-2005  
- All rights reserved.

[License Agreement](#)

GEMS Launcher 4.1.1

[Genomatix-Logo](#)      [Logout](#)      [Personal](#)      [Messages](#)      [GEMS-Logo](#)

---

[Genomatix Main](#) [GEMSEI](#) [Dorado](#) [Gene2Promoter](#) [BiblioSphere](#)  
[Frequently asked questions](#) [Your Results](#) [Your Sequences](#) [Your Protocol](#) [Help](#)

---

**GEMS Launcher Task: *DiAlign TF*: Multiple alignment plus TF sites working on C1-NDUFC1 (3 seq.)**

---

[[Alignment](#)] [[Pairwise similarities](#)]

---

**DiAlign professional TF Release 3.1 December 2004** **Tue Jun 7 19:15:08 2005**

---

### Solution parameters:

**Sequence file:** [C1-NDUFC1](#) (3 seq.)  
**Type of sequences:** nucleotide sequences  
**Threshold T:** 0.00  
**'\*' signs below alignment denote:** diagonal similarity (max. similarity is represented by 10 '\*' signs) complete alignment is shown  
**Alignment output:** # nucleic acids per line: 50  
**TF output:** common TF matches located in aligned regions (common to 3 (100.0 %) sequences)  
**Family matches:** yes  
**MatInspector library:** Matrix Family Library Version 5.0 (February 2005)  
**Selected groups** (core/matrix sim):  

- ALL user\_defined.lib (0.75/Optimized)
- ALL vertebrates.lib (0.75/Optimized)

---

### Aligned Sequences:

| No. | Sequence Name | Sequence Description                                                                                                                                                                                                              | Length  |
|-----|---------------|-----------------------------------------------------------------------------------------------------------------------------------------------------------------------------------------------------------------------------------|---------|
| 1   | P855801       | P855801 sym=NDUFC1 loc=Loc4717 taxid=9606 spec=Homo sapiens chr=4 ctg=NT_016354 str=(-) start=64711588 end=64712588 len=1001 tss=501 comm=NADH dehydrogenase (ubiquinone) 1, subcomplex unknown, 1, 6kDa; (NM_002494/501/bronze;) | 1001 bp |
| 2   | mNDUFC1       | mNDUFC1 m6_dna range=chr3:51040462-51041402 5'pad=0 3'pad=0 revComp=TRUE strand=? repeatMasking=none                                                                                                                              | 941 bp  |
| 3   | rNDUFC1       | rNDUFC1 n3_dna range=chr2:140251319-140252373 5'pad=0 3'pad=0 revComp=TRUE strand=? repeatMasking=none                                                                                                                            | 1055 bp |

---

### Alignment (DiAlign format):

Please note that only **upper-case** letters are considered to be **aligned**. For more information, please have a look at the user guide.

```

VSNRSI VSRORA VSEREF USEREF VSLEFF
alignment position 1 . . . . . 1 1 . . . . . 2 1 . . . . . 3 1 . . . . . 4 1 . . . . .
P855801      1 a a a - - - - -
mNDUFC1     1 c a c c c c g a T G A A T A A C A G A A C C T A C C T C A T A G G A C T G A G A G G A A T C a a t g
rNDUFC1     1 c t c c c c g g T G A A T A A C A G A A C C T A T C T C A C A G G A C T G A G A G G A A T C t a t g
                * * * * *
                * * * * *
                * * * * *
                * * * * *
alignment position 5 1 . . . . . 6 1 . . . . . 7 1 . . . . . 8 1 . . . . . 9 1 . . . . .
    
```











For [comments](#), questions or bug reports, please contact [support@genomatix.de](mailto:support@genomatix.de)

© Genomatix Software GmbH 1998-2005  
- All rights reserved.

[License Agreement](#)

GEMS Launcher 4.1.1

[Genomatix-Logo](#)      [Logout](#)      [Personal](#)      [Messages](#)      [GEMS-Logo](#)  
[Logout](#)      [Personal](#)      [Messages](#)  


---

[Genomatix Main](#) [GEMSEI](#) [Dorado](#) [Gene2](#) [Promoter](#) [BiblioSphere](#)  
[Frequently asked questions](#) [Your Results](#) [Your Sequences](#) [Your Protocol](#) [Help](#)  


---

**GEMS Launcher Task: *DiAlign TF*: Multiple alignment plus TF sites working on promoters.seq (3 seq.)**  


---

[\[Alignment\]](#) [\[Pairwise similarities\]](#)

DiAlign professional TF Release 3.1 December 2004

Tue Jun 7 19:27:17 2005

### Solution parameters:

**Sequence file:** [promoters.seq](#) (3 seq.)  
**Type of sequences:** nucleotide sequences  
**Threshold T:** 0.00  
**\*! signs below alignment denote:** diagonal similarity (max. similarity is represented by 10 '!\*' signs)  
**Alignment output:** complete alignment is shown  
# nucleic acids per line: 50  
**TF output:** common TF matches located in aligned regions (common to 3 (100.0 %) sequences)  
**Family matches:** yes  
**MatInspector library:** Matrix Family Library Version 5.0 (February 2005)  

- ALL user\_defined.lib (0.75/Optimized)
- ALL vertebrates.lib (0.75/Optimized)

**Selected groups**  
(core/matrix sim):

### Aligned Sequences:

| No. | Sequence Name | Sequence Description                                                                                                                                                                                                                                                                                        | Length  |
|-----|---------------|-------------------------------------------------------------------------------------------------------------------------------------------------------------------------------------------------------------------------------------------------------------------------------------------------------------|---------|
| 1   | P914220       | sym=NDUFC2 loc=Loc4718 taxid=9606 spec=Homo sapiens chr=11 ctg=NT_033927 str=(-) start=8013089 end=8014180 len=1092  tss=501,526,545,592  comm=NADH dehydrogenase (ubiquinone) 1, subcomplex unknown, 2, 14.5kDa; (AK098173/545/gold;AK023013/526/gold;AK022785/592/gold; NM_004549/501/silver;)            | 1092 bp |
| 2   | P914221       | sym=Ndufc2 loc=Loc68197 taxid=10090 spec=Mus musculus chr=7 ctg=NT_039433 str=(+) start=15232116 end=15233139 len=1024  tss=501,516,520,524  comm=NADH dehydrogenase (ubiquinone) 1, subcomplex unknown, 2; (AK002373/536/gold;AK008889/536/gold;AK019002/517/gold;AK003380/540/gold;NM_024220/532/bronze;) | 1024 bp |
| 3   | P914222       | sym=naloc=Loc293130 taxid=10116 spec=Rattus norvegicus chr=1 ctg=NW_047561 str=(+) start=13521471 end=13522471  len=1001 tss=501  comm=similar to RIKEN cDNA 1810004I06; (XM_214989/545/bronze;)                                                                                                            | 1001 bp |

### Alignment (DiAlign format):

Please note that only **upper-case** letters are considered to be **aligned**. For more information, please have a look at the user guide.

[V\\$TBPI](#) [V\\$SETF](#) [V\\$SEGRF](#) [V\\$INSM](#) [V\\$SPIF](#) [V\\$PBXC](#)

```

alignment position 1 . . . . . 11 . . . . . 21 . . . . . 31 . . . . . 41 . . . . .
P914220      1 g t g a a c a t t t t a g g g t g c t g c c t c c g a a t c t g a a t t t c a a c a a t a g a c t
P914221      1 a g g g T - - - - -
P914222      1 t - - - T - - - - -
    
```

|                |          |                     |                     |                     |                     |                   |  |  |  |
|----------------|----------|---------------------|---------------------|---------------------|---------------------|-------------------|--|--|--|
|                |          |                     |                     | *                   |                     |                   |  |  |  |
| alignment      | position | 51                  | 61                  | 71                  | 81                  | 91                |  |  |  |
| <b>P914220</b> | 51       | a AAA CGAT CC       | AGTC CTGGGC         | TTCTCTAAAT          | t c TT TTGT TG      | CTGGCCAGAC        |  |  |  |
| <b>P914221</b> | 6        | - AAA TGAT TC       | GCTC CTGACC         | TCCg a a t a c c    | c - - - TGGT TG     | CTGACCTTAC        |  |  |  |
| <b>P914222</b> | 3        | - AAA GGAT CT       | GCTC CTGGCC         | TTCTCTGAAT          | a - TT CTGCT TA     | CTGACCTTCC        |  |  |  |
|                |          | *****               | *****               | *****               | *****               | *****             |  |  |  |
|                |          |                     |                     |                     | *****               | *****             |  |  |  |
|                |          |                     |                     |                     |                     | *****             |  |  |  |
|                |          |                     |                     |                     |                     | *****             |  |  |  |
|                |          |                     |                     |                     |                     | *****             |  |  |  |
|                |          |                     |                     |                     |                     | *****             |  |  |  |
| alignment      | position | 101                 | 111                 | 121                 | 131                 | 141               |  |  |  |
| <b>P914220</b> | 101      | CTTA ATTT TA        | GGCT TTGGAG         | G- - - - -          | - - GA GTGT CT      | ATGCGAATGA        |  |  |  |
| <b>P914221</b> | 51       | CTTC ATTT TA        | GGCT TTGGGG         | GTGGGGg a -         | - - - - AGT AA      | CTGCAAACGA        |  |  |  |
| <b>P914222</b> | 51       | CTTA ATTT TA        | GGCA TTGGGG         | GTGGGGc g t g       | a a GG GAGT AA      | CTGCAAATGA        |  |  |  |
|                |          | *****               | *****               | *****               | *****               | *****             |  |  |  |
|                |          | *****               | *****               | *****               | *****               | *****             |  |  |  |
|                |          | *****               | *****               | *****               | *****               | *****             |  |  |  |
|                |          | *****               | *****               | *****               | *****               | *****             |  |  |  |
|                |          | *****               | *****               | *****               | *****               | *****             |  |  |  |
| alignment      | position | 151                 | 161                 | 171                 | 181                 | 191               |  |  |  |
| <b>P914220</b> | 140      | ACGA CTGA AA        | ACTC AGAAaA         | c g a a a a CTAG    | CTTTTATGGA          | ATTCAATTA         |  |  |  |
| <b>P914221</b> | 94       | ACTG CTGG AA        | CCCC AGAAAG         | - - - - CTG         | CTTTTATAAG          | CTTTAGATAA        |  |  |  |
| <b>P914222</b> | 101      | ACTG TCGG AA        | CCCC AGAAAG         | - - - - CTAG        | CTTTTATGCG          | ITTCAACAA         |  |  |  |
|                |          | *****               | *****               | *****               | *****               | *****             |  |  |  |
|                |          | *****               | *****               | *****               | *****               | *****             |  |  |  |
|                |          | *****               | *****               | *****               | *****               | *****             |  |  |  |
|                |          | *****               | *****               | *****               | *****               | *****             |  |  |  |
|                |          | *****               | *****               | *****               | *****               | *****             |  |  |  |
| alignment      | position | 201                 | 211                 | 221                 | 231                 | 241               |  |  |  |
| <b>P914220</b> | 190      | ATTa c g t t t a    | t c a a AACT AC     | GCATCATGCC          | CATT TGTG GG        | TATTGGATGa        |  |  |  |
| <b>P914221</b> | 138      | ATG- - - - -        | - - - - AACT AG     | CCATTATGAC          | CACT TGTAGA         | TGTTGa - TTT      |  |  |  |
| <b>P914222</b> | 145      | ATG- - - - -        | - - - - AACT AC     | CTATCACGAC          | CACC TGTAGG         | TGTTGGGTTT        |  |  |  |
|                |          | **                  | *****               | *****               | *****               | *****             |  |  |  |
|                |          | **                  | *****               | *****               | *****               | *****             |  |  |  |
|                |          | **                  | *****               | *****               | *****               | *****             |  |  |  |
| alignment      | position | 251                 | 261                 | 271                 | 281                 | 291               |  |  |  |
| <b>P914220</b> | 240      | a a a g a t a - -   | - - - - AATCTT      | TCCAGAA- - -        | - - - - -           | - GGGCAGGG        |  |  |  |
| <b>P914221</b> | 176      | TTGG ATGC TA        | AGAT AATGTT         | TTCTGAAGAG          | CCAT a g g c c t    | g GGGCAAGT        |  |  |  |
| <b>P914222</b> | 184      | TTGG ATGC TA        | AAAT AATCTT         | TTCTGAACAG          | TCAT g a g c t      | - GGGCAAGT        |  |  |  |
|                |          | *****               | *****               | *****               | *****               | *****             |  |  |  |
|                |          | *****               | *****               | *****               | *****               | *****             |  |  |  |
|                |          | *****               | *****               | *****               | *****               | *****             |  |  |  |
|                |          | *****               | *****               | *****               | *****               | *****             |  |  |  |
| alignment      | position | 301                 | 311                 | 321                 | 331                 | 341               |  |  |  |
| <b>P914220</b> | 269      | GAGG GAGA GG        | CAAT TCTGGT         | TGGGGAag t t        | g g g a g a a a g   | a - - - - -       |  |  |  |
| <b>P914221</b> | 226      | AAGT GAGA GA        | CAAT TTCGAT         | TGTGGTAACT          | GGAC TACATA         | CATACATACA        |  |  |  |
| <b>P914222</b> | 233      | GAGT GAGA a -       | - AAT TTCGTA        | TGCGACAACT          | GAAC TAAATA         | AACAAATAAA        |  |  |  |
|                |          | *****               | *****               | *****               | *****               | *****             |  |  |  |
|                |          | *****               | *****               | *****               | *****               | *****             |  |  |  |
| alignment      | position | 351                 | 361                 | 371                 | 381                 | 391               |  |  |  |
| <b>P914220</b> | 310      | - - - - -           | - - - - - A         | AATCAGTATC          | T CCT AGT C TT      | CGCCCAGTTT        |  |  |  |
| <b>P914221</b> | 276      | T a c a t a c a t a | c a t a c a t a c A | TACCAATGTT          | T CCT AGC C TT      | TGCCCACTGT        |  |  |  |
| <b>P914222</b> | 281      | T a a a t a g - -   | - - - - -           | - - - CAACGTT       | T CCT AGT C TT      | TGCCCACTGT        |  |  |  |
|                |          | *                   |                     | *                   | *****               | *****             |  |  |  |
|                |          |                     |                     |                     | *****               | *****             |  |  |  |
|                |          |                     |                     |                     | *****               | *****             |  |  |  |
|                |          |                     |                     |                     | *****               | *****             |  |  |  |
|                |          |                     |                     |                     | *****               | *****             |  |  |  |
| alignment      | position | 401                 | 411                 | 421                 | 431                 | 441               |  |  |  |
| <b>P914220</b> | 341      | GGCT CGTT TG        | GGGT ACTCCT         | c g a c c c g c g   | t - TACCAGGC        | CCgt g a a t CC   |  |  |  |
| <b>P914221</b> | 326      | GGGT TATT TA        | TTat a a c c c c    | c c c c c a c a c a | c a c a c a c a c a | - - - - - CA      |  |  |  |
| <b>P914222</b> | 315      | GGGT TATT TA        | TTTT ACCCCT         | g g a c t g g c t t | a g TACCTG GC       | CCc c a g c a c c |  |  |  |





```

*****
**
alignment position 1151 . . . . . 1161 . . . . . 1171 . .
P914220 1067 AGTT CGt g t t g t g c t g t g t g c g c a a a
P914221 1019 AGTT CG- - - - - - - - - - - - - - - - - - -
P914222 1002 - - - - - - - - - - - - - - - - - - - - - - -
*****
    
```

**Pairwise similarities:**

For each pairwise alignment, the **similarity** (relative to the maximum similarity) and the **number of identical nucleic acids** (in % of shorter sequence) is given. Maximum values are underlined.

|                      | P914221<br>(1024 bp) | P914222<br>(1001 bp)        |
|----------------------|----------------------|-----------------------------|
| P914220<br>(1092 bp) | <u>0.340</u><br>51 % | <u>0.354</u><br>53 %        |
| P914221<br>(1024 bp) |                      | <u>1.000</u><br><u>74 %</u> |

Please note that the **similarity value 1.000** marks only the two **most similar** sequences, it does not necessarily mean that these sequences are identical.

| Extract alignment region         |                                                     |
|----------------------------------|-----------------------------------------------------|
| Positions in alignment           | from: <input type="text"/> to: <input type="text"/> |
| Output file                      | <input type="text" value="dialign.seq"/>            |
| <b>Extract aligned sequences</b> |                                                     |

For [comments](#), questions or bug reports, please contact [support@genomatix.de](mailto:support@genomatix.de)













|                      |  |                             |
|----------------------|--|-----------------------------|
| P922029<br>(1043 bp) |  | <b>1.000</b><br><u>73 %</u> |
|----------------------|--|-----------------------------|

Please note that the **similarity value 1.000** marks only the two **most similar** sequences, it does not necessarily mean that these sequences are identical.

| Extract alignment region         |                                                     |
|----------------------------------|-----------------------------------------------------|
| <b>Positions in alignment</b>    | from: <input type="text"/> to: <input type="text"/> |
| <b>Output file</b>               | <input type="text" value="dialign.seq"/>            |
| <b>Extract aligned sequences</b> |                                                     |

For [comments](#), questions or bug reports, please contact [support@genomatix.de](mailto:support@genomatix.de)

© Genomatix Software GmbH 1998-2005  
- All rights reserved.

[License Agreement](#)

GEMS Launcher 4.1.1















```

hNDFUS2 2051 c t t t t c t c a c g t t c a t a t t c a c c t g g t t g a t a a t a t c a a t a t g a t g a a a
P914253 1000 t g - - - - - - - - - - - - - - - - - - - - - - - - - - - - - - - - - - - - - - - - - - - - - -
P914254 987 c c c g c c c c a t c t c t - - - - - - - - - - - - - - - - - - - - - - - - - - - - - - - - - - - - -

alignment position 2 2 5 1 . . . . . 2 2 6 1 . . . . . 2 2 7 1 . . . . . 2 2 8 1 . . . . . 2 2 9 1 . . . . .
hNDFUS2 2101 t a t g a g a g a g c t a g g a t c c c a a c c t t g c a t g c c c a g g g g t g a t g g g t g g a
P914253 1002 - - - - - - - - - - - - - - - - - - - - - - - - - - - - - - - - - - - - - - - - - - - - - -
P914254 1002 - - - - - - - - - - - - - - - - - - - - - - - - - - - - - - - - - - - - - - - - - - - - - -

alignment position 2 3 0 1 . . . . . 2 3 1 1 . . . . . 2 3 2 1 . . . . . 2 3 3 1 . . . . . 2 3 4 1 . . . . .
hNDFUS2 2151 g t t a t t c c a g g a a t a a t t t g t t a g t a g g a a t g g a a c c t c t a g a g t t c c a g
P914253 1002 - - - - - - - - - - - - - - - - - - - - - - - - - - - - - - - - - - - - - - - - - - - - - -
P914254 1002 - - - - - - - - - - - - - - - - - - - - - - - - - - - - - - - - - - - - - - - - - - - - - -

alignment position 2 3 5 1 . . . . . 2 3 6 1 . . . . . 2 3 7 1 . . . . . 2 3 8 1 . . . . . 2 3 9 1 . . . . .
hNDFUS2 2201 c t t g t t t g c c g a a g c t a c a t t a a c t t c a g a t c a g t g a c t t g g c a t t a a a
P914253 1002 - - - - - - - - - - - - - - - - - - - - - - - - - - - - - - - - - - - - - - - - - - - - - -
P914254 1002 - - - - - - - - - - - - - - - - - - - - - - - - - - - - - - - - - - - - - - - - - - - - - -

alignment position 2 4 0 1
hNDFUS2 2251 a a
P914253 1002 - -
P914254 1002 - -
    
```

**Pairwise similarities:**

For each pairwise alignment, the **similarity** (relative to the maximum similarity) and the **number of identical nucleic acids** (in % of shorter sequence) is given. Maximum values are underlined.

|                             | <b>P914253</b><br>(1001 bp) | <b>P914254</b><br>(1001 bp) |
|-----------------------------|-----------------------------|-----------------------------|
| <b>hNDFUS2</b><br>(2252 bp) | 0.307<br>39 %               | 0.324<br>32 %               |
| <b>P914253</b><br>(1001 bp) |                             | <u>1.000</u><br><u>57 %</u> |

Please note that the **similarity value 1.000** marks only the two **most similar** sequences, it does not necessarily mean that these sequences are identical.

| Extract alignment region  |                                                     |
|---------------------------|-----------------------------------------------------|
| Positions in alignment    | from: <input type="text"/> to: <input type="text"/> |
| Output file               | <input type="text" value="dialign.seq"/>            |
| Extract aligned sequences |                                                     |

For [comments](#), questions or bug reports, please contact [support@genomatix.de](mailto:support@genomatix.de)

[Genomatix-Logo](#)      [Logout](#)      [Personal](#)      [Messages](#)      [GEMS-Logo](#)  
[Logout](#)      [Personal](#)      [Messages](#)  
[Genomatix Main](#) [GEMSEI](#) [Dorado](#) [Gene2Promoter](#) [BiblioSphere](#)  
[Frequently asked questions](#) [Your Results](#) [Your Sequences](#) [Your Protocol](#) [Help](#)

---

**GEMS Launcher Task: *DiAlign TF*: Multiple alignment plus TF sites working on promoters.seq (3 seq.)**

[\[Alignment\]](#)   [\[Pairwise similarities\]](#)

DiAlign professional TF Release 3.1 December 2004

Tue Jun 7 20:56:18 2005

### Solution parameters:

**Sequence file:** [promoters.seq](#) (3 seq.)  
**Type of sequences:** nucleotide sequences  
**Threshold T:** 0.00  
**'\*' signs below alignment denote:** diagonal similarity (max. similarity is represented by 10 '\*' signs)  
**Alignment output:** complete alignment is shown  
# nucleic acids per line: 50  
**TF output:** common TF matches located in aligned regions (common to 3 (100.0 %) sequences)  
**Family matches:** yes  
**MatInspector library:** Matrix Family Library Version 5.0 (February 2005)  
**Selected groups**      • ALL vertebrates.lib (0.75/Optimized)  
(core/matrix sim):

### Aligned Sequences:

| No. | Sequence Name | Sequence Description                                                                                                                                                                                                                                                                                                | Length  |
|-----|---------------|---------------------------------------------------------------------------------------------------------------------------------------------------------------------------------------------------------------------------------------------------------------------------------------------------------------------|---------|
| 1   | P878333       | sym=NDUFS3 loc=Loc4722 taxid=9606 spec=Homo sapiens chr=11 ctg=NT_009237 str=(+) start=46387373 end=46388373 len=1001 tss=501 comm=NADH dehydrogenase (ubiquinone) Fe-S protein 3, 30kDa (NADH-coenzyme Q reductase); (NM_004551/560/silver;)                                                                       | 1001 bp |
| 2   | P878334       | sym=nal loc=Loc433454 taxid=10090 spec=Mus musculus chr=2 ctg=NT_039207 str=(-) start=31738929 end=31740003 len=1075 tss=501,530,575 comm=similar to NADH-ubiquinone oxidoreductase 30 kDa subunit, mitochondrial precursor (Complex I-30KD) (CI-30KD); (AK088337/501/gold;AK002501/530/gold;XM_485037/575/bronze;) | 1075 bp |
| 3   | P878335       | sym=nal loc=Loc295923 taxid=10116 spec=Rattus norvegicus chr=3 ctg=NW_047657 str=(-) start=16664085 end=16665085 len=1001 tss=501 comm=similar to NADH-ubiquinone oxidoreductase 30 kDa subunit, mitochondrial precursor (Complex I-30KD) (CI-30KD); (XM_215776/550/bronze;)                                        | 1001 bp |

### Alignment (DiAlign format):

Please note that only **upper-case** letters are considered to be **aligned**. For more information, please have a look at the user guide.

V\$XBBF
V\$VMYB
V\$AREB
V\$SP1F
V\$RREB
V\$ZBPF
V\$SEGRF
V\$GABF
V\$SETSF
V\$ZF35
V\$SEREF

```

alignment
position      1 . . . . . 1 1 . . . . . 2 1 . . . . . 3 1 . . . . . 4 1 . . . . .
P878333      1 - - - - -
P878334      1 c c a a t a c t g a g g c t t g g g c c t g g a c t t c c a c t t t t a c t c t t t t c t a a g c T
P878335      1 - - - - -
    
```











```

*****
*****
alignment
position 1101.....1111.....1121...
P878333 979 TTA AACTGT C a g c t c t t t g a a a g - - -
P878334 1049 TGA AATTGT C t t t g a g c g c a g g t a a c a
P878335 1002 - - - - - - - - - - - - - - - - - - - - -
*****

```

### Pairwise similarities:

For each pairwise alignment, the **similarity** (relative to the maximum similarity) and the **number of identical nucleic acids** (in % of shorter sequence) is given. Maximum values are underlined.

|                                    | <b>P878334</b><br><b>(1075 bp)</b> | <b>P878335</b><br><b>(1001 bp)</b> |
|------------------------------------|------------------------------------|------------------------------------|
| <b>P878333</b><br><b>(1001 bp)</b> | 0.356<br>60 %                      | 0.366<br>64 %                      |
| <b>P878334</b><br><b>(1075 bp)</b> |                                    | <u>1.000</u><br><u>88 %</u>        |

Please note that the **similarity value 1.000** marks only the two **most similar** sequences, it does not necessarily mean that these sequences are identical.

| Extract alignment region         |                                                     |
|----------------------------------|-----------------------------------------------------|
| <b>Positions in alignment</b>    | from: <input type="text"/> to: <input type="text"/> |
| <b>Output file</b>               | <input type="text" value="dialign.seq"/>            |
| <b>Extract aligned sequences</b> |                                                     |

For [comments](#), questions or bug reports, please contact [support@genomatix.de](mailto:support@genomatix.de)

[Genomatix-Logo](#)      [Logout](#)      [Personal](#)      [Messages](#)      [GEMS-Logo](#)

---

[Genomatix Main](#) [GEMSEI](#) [Dorado](#) [Gene2Promoter](#) [BiblioSphere](#)  
[Frequently asked questions](#) [Your Results](#) [Your Sequences](#) [Your Protocol](#) [Help](#)

---

**GEMS Launcher Task: *DiAlign TF*: Multiple alignment plus TF sites working on C1-NDUFS4 (3 seq.)**

---

[[Alignment](#)] [[Pairwise similarities](#)]

---

**DiAlign professional TF Release 3.1 December 2004** **Tue Jun 7 22:10:52 2005**

---

### Solution parameters:

**Sequence file:** [C1-NDUFS4](#) (3 seq.)  
**Type of sequences:** nucleotide sequences  
**Threshold T:** 0.00  
**'\*' signs below alignment denote:** diagonal similarity (max. similarity is represented by 10 '\*' signs) complete alignment is shown  
**Alignment output:** # nucleic acids per line: 50  
**TF output:** common TF matches located in aligned regions (common to 3 (100.0 %) sequences)  
**Family matches:** yes  
**MatInspector library:** Matrix Family Library Version 5.0 (February 2005)  
**Selected groups** (core/matrix sim):  

- ALL user\_defined.lib (0.75/Optimized)
- ALL vertebrates.lib (0.75/Optimized)

---

### Aligned Sequences:

| No. | Sequence Name | Sequence Description                                                                                                                                                                                                                                             |
|-----|---------------|------------------------------------------------------------------------------------------------------------------------------------------------------------------------------------------------------------------------------------------------------------------|
| 1   | P855897       | P855897 sym=NDUFS4 loc=Loc4724 taxid=9606 spec=Homo sapiens chr=5 ctg=NT_006713 str=(+) start=3450344 end=3451344 len=1001 tss=501 comm=NADH dehydrogenase (ubiquinone) Fe-S protein 4, 18kDa (NADH-coenzyme Q reductase); (NM_002495/516/bronze;)               |
| 2   | P855898       | P855898 sym=Ndufs4 loc=Loc17993 taxid=10090 spec=Mus musculus chr=13 ctg=NT_039590 str=(-) start=22613656 end=22614693 len=1038 tss=501,533,538 comm=NADH dehydrogenase (ubiquinone) Fe-S protein 4; (AK011124/501/gold;AK020552/533/gold;NM_010887/538/bronze;) |
| 3   | rNDUFS4       | rNDUFS4 n3_dna range=chr2:46407330-46408355 5'pad=0 3'pad=0 revComp=TRUE strand=? repeatMasking=none                                                                                                                                                             |

---

### Alignment (DiAlign format):

Please note that only **upper-case** letters are considered to be **aligned**. For more information, please have a look at the user guide.

V\$NFAI V\$AP4R V\$BRNF V\$NKXH V\$MYOD V\$FKHD V\$SETF V\$YYIF V\$NEUR V\$TALE V\$WHZF V\$RORA  
V\$SPIF

```

alignment
position      1 . . . . . 1 1 . . . . . 2 1 . . . . . 3 1 . . . . . 4 1 . . . . .
P855897      1 t t t c g t t - - - - - - - - - - - - - - - - T G G A A A A T A C G A A
P855898      1 c - - T T T T T T T T T T T T G C G A G G C T A G C T T T T T A G T G T G G A A A A T A T G A T
rNDUFS4      1 t t t t T T T T T T A T C T T T G G C G A G G C C A G A T T T T T A G T G T G G A A A A T A T G A T
    
```







|                    |      |            |            |                            |              |            |                    |           |           |                   |
|--------------------|------|------------|------------|----------------------------|--------------|------------|--------------------|-----------|-----------|-------------------|
|                    |      | * * * * *  | * * * * *  | * * * * *                  | * * * * *    | * * * * *  | * * * * *          | * * * * * | * * * * * |                   |
| alignment position | 851  | . . . . .  | 861        | . . . . .                  | 871          | . . . . .  | 881                | . . . . . | 891       | . . . . .         |
| <b>P855897</b>     | 750  | ctgtctgcta | tcaatggcgt | tggccaggc                  | gagtgaggc    | gtgagtgcga |                    |           |           |                   |
| <b>P855898</b>     | 804  | - - - - -  | - - - - -  | - - - - -                  | - - - - -    | - - - - -  | - - - - -          | - - - - - | - - - - - | - - - - -         |
| <b>rNDUFS4</b>     | 801  | - - - - -  | - - - - -  | - - - - -                  | - - - - -    | - - - - -  | - - - - -          | - - - - - | - - - - - | - - - - -         |
| alignment position | 901  | . . . . .  | 911        | . . . . .                  | 921          | . . . . .  | 931                | . . . . . | 941       | . . . . .         |
| <b>P855897</b>     | 800  | ggcgggag   | gaggacctgt | ggtttctgg                  | aagcttctgt   | atTCG      | GCTTG              |           |           |                   |
| <b>P855898</b>     | 804  | - - - - -  | - - - - -  | - - - - -                  | - - - - -    | - - - - -  | - - - - -          | - - - - - | - - - - - | CTG               |
| <b>rNDUFS4</b>     | 801  | - - - - -  | - - - - -  | - - - - -                  | - - - - -    | - - - - -  | - - - - -          | - - - - - | - - - - - | TGGGTCTG<br>***** |
| alignment position | 951  | . . . . .  | 961        | . . . . .                  | 971          | . . . . .  | 981                | . . . . . | 991       | . . . . .         |
| <b>P855897</b>     | 850  | TCGCTGAGGG | A - - -    | GAGGGTCCGTG                | gagg         | ttttgcctcc | GGAGCTGCAA         |           |           |                   |
| <b>P855898</b>     | 807  | CAGCTGCGGa | cgggc      | GAGGGTCTGTG                | CGBA         | - - - - -  | GGAGCTGTGA         |           |           |                   |
| <b>rNDUFS4</b>     | 809  | CAGCTGCGGG | T - - -    | GAGGGTCTATG                | CGBA         | - - - - -  | GGAGCTGTGA         |           |           |                   |
|                    |      | * * * * *  | *          | * * * * *                  | * * * * *    | * * * * *  | * * * * *          |           |           |                   |
|                    |      |            |            | * * * * *                  | * * * * *    | * * * * *  | * * * * *          |           |           |                   |
|                    |      |            |            | * * * * *                  | * * * * *    | * * * * *  | * * * * *          |           |           |                   |
|                    |      |            |            | * * * * *                  | * * * * *    | * * * * *  | * * * * *          |           |           |                   |
| alignment position | 1001 | . . . . .  | 1011       | . . . . .                  | 1021         | . . . . .  | 1031               | . . . . . | 1041      | . . . . .         |
| <b>P855897</b>     | 896  | GCTGAACCTT | AGCCctcaGA | <b>G A A G G G G A G G</b> | <b>AGTCT</b> | cactg      | at t t c t g t t t |           |           |                   |
| <b>P855898</b>     | 847  | ACTGGATCGT | GGCTCCT-GA | <b>G A A G G G G A G G</b> | <b>AGTCT</b> | GGGCG      | ACCTCTCTCC         |           |           |                   |
| <b>rNDUFS4</b>     | 845  | ACCGGACTGT | GGCTCCT-GA | <b>G A A G G G G A G G</b> | <b>AGTCT</b> | GGGCG      | ACCTCTCTCC         |           |           |                   |
|                    |      | * * * * *  | * * * * *  | * * * * *                  | * * * * *    | * * * * *  | * * * * *          |           |           |                   |
|                    |      | * * * * *  | * * * * *  | * * * * *                  | * * * * *    | * * * * *  | * * * * *          |           |           |                   |
|                    |      | * * * * *  | * * * * *  | * * * * *                  | * * * * *    | * * * * *  | * * * * *          |           |           |                   |
|                    |      |            |            | * * * * *                  | * * * * *    | * * * * *  | * * * * *          |           |           |                   |
|                    |      |            |            | * * * * *                  | * * * * *    | * * * * *  | * * * * *          |           |           |                   |
|                    |      |            |            | * * * * *                  | * * * * *    | * * * * *  | * * * * *          |           |           |                   |
| alignment position | 1051 | . . . . .  | 1061       | . . . . .                  | 1071         | . . . . .  | 1081               | . . . . . | 1091      | . . . . .         |
| <b>P855897</b>     | 946  | ccactttC-T | GCATCCCTTC | CATTTGTCAC                 | CTGTTTGCC    | accactccag |                    |           |           |                   |
| <b>P855898</b>     | 896  | CAATGTcC-T | ACATCCCTTC | CGCTTGTCAC                 | CTGCTTGCC    | CATTCCAGCC |                    |           |           |                   |
| <b>rNDUFS4</b>     | 894  | CAATGTccT  | GCATCCCTTC | CGTTTGTCAC                 | CTGTTTGCC    | CATTCCAGCC |                    |           |           |                   |
|                    |      | * * * * *  | * * * * *  | * * * * *                  | * * * * *    | * * * * *  | * * * * *          |           |           |                   |
|                    |      | * * * * *  | * * * * *  | * * * * *                  | * * * * *    | * * * * *  | * * * * *          |           |           |                   |
|                    |      | * * * * *  | * * * * *  | * * * * *                  | * * * * *    | * * * * *  | * * * * *          |           |           |                   |
|                    |      | * * * * *  | * * * * *  | * * * * *                  | * * * * *    | * * * * *  | * * * * *          |           |           |                   |
|                    |      | * * * * *  | * * * * *  | * * * * *                  | * * * * *    | * * * * *  | * * * * *          |           |           |                   |
|                    |      |            |            | * * * * *                  | * * * * *    | * * * * *  | * * * * *          |           |           |                   |
|                    |      |            |            | * * * * *                  | * * * * *    | * * * * *  | * * * * *          |           |           |                   |
| alignment position | 1101 | . . . . .  | 1111       | . . . . .                  | 1121         | . . . . .  | 1131               | . . . . . | 1141      | . . . . .         |
| <b>P855897</b>     | 995  | tcccttac   | - - - - -  | - - - - -                  | - - - - -    | - - - - -  | - - - - -          | - - - - - | - - - - - | - - - - -         |
| <b>P855898</b>     | 945  | TGAAAGGGTA | AATCCCTGCT | ATCCTTTCC                  | C TGGCTTTAGT | Taata      | TCGGC              |           |           |                   |
| <b>rNDUFS4</b>     | 944  | TGAAAGGGTA | AATCCCTGCT | TTCC                       | TTTCC        | TGGCATTAGT | Tactg              | TCGAC     |           |                   |
|                    |      | * * * * *  | * * * * *  | * * * * *                  | * * * * *    | * * * * *  | * * * * *          |           |           |                   |
|                    |      | * * * * *  | * * * * *  | * * * * *                  | * * * * *    | * * * * *  | * * * * *          |           |           |                   |
|                    |      | * * * * *  | * * * * *  | * * * * *                  | * * * * *    | * * * * *  | * * * * *          |           |           |                   |
|                    |      | * * * * *  | * * * * *  | * * * * *                  | * * * * *    | * * * * *  | * * * * *          |           |           |                   |
|                    |      | * * * * *  | * * * * *  | * * * * *                  | * * * * *    | * * * * *  | * * * * *          |           |           |                   |
| alignment position | 1151 | . . . . .  | 1161       | . . . . .                  | 1171         | . . . . .  | 1181               | . . . . . | 1191      | . . . . .         |
| <b>P855897</b>     | 1002 | - - - - -  | - - - - -  | - - - - -                  | - - - - -    | - - - - -  | - - - - -          | - - - - - | - - - - - | - - - - -         |
| <b>P855898</b>     | 995  | TGGGCTTCCA | AACAGA     | AAGG                       | TGTTGTATT    | CATc       | atgtgc             | at        | a         |                   |

```
rNDUFS4 994 TGAGCTTCTG AACAGAAAGG ATGTTGTATT CAT - - - - -
* * * * *
* * * * *
* * * * *
```

### Pairwise similarities:

For each pairwise alignment, the **similarity** (relative to the maximum similarity) and the **number of identical nucleic acids** (in % of shorter sequence) is given. Maximum values are underlined.

|                             | <b>P855898</b><br>(1038 bp) | <b>rNDUFS4</b><br>(1026 bp) |
|-----------------------------|-----------------------------|-----------------------------|
| <b>P855897</b><br>(1001 bp) | 0.320<br>54 %               | 0.335<br>54 %               |
| <b>P855898</b><br>(1038 bp) |                             | <u>1.000</u><br><u>87 %</u> |

Please note that the **similarity value 1.000** marks only the two **most similar** sequences, it does not necessarily mean that these sequences are identical.

| Extract alignment region |                                                     |
|--------------------------|-----------------------------------------------------|
| Positions in alignment   | from: <input type="text"/> to: <input type="text"/> |
| Output file              | <input type="text" value="dialign.seq"/>            |

Extract aligned sequences

For [comments](#), questions or bug reports, please contact [support@genomatix.de](mailto:support@genomatix.de)



[Genomatix-Logo](#)      [Logout](#)      [Personal](#)      [Messages](#)      [GEMS-Logo](#)  
[Logout](#)      [Personal](#)      [Messages](#)  
[Genomatix Main](#) [GEMSEI](#) [Dorado](#) [Gene2Promoter](#) [BiblioSphere](#)  
[Frequently asked questions](#) [Your Results](#) [Your Sequences](#) [Your Protocol](#) [Help](#)

---

**GEMS Launcher Task: *DiAlign TF*: Multiple alignment plus TF sites working on C1-NDUFS5 (3 seq.)**

[\[Alignment\]](#)   [\[Pairwise similarities\]](#)

DiAlign professional TF Release 3.1 December 2004

Tue Jun 7 22:52:13 2005

### Solution parameters:

**Sequence file:** [C1-NDUFS5](#) (3 seq.)  
**Type of sequences:** nucleotide sequences  
**Threshold T:** 0.00  
**'\*' signs below alignment denote:** diagonal similarity (max. similarity is represented by 10 '\*' signs) complete alignment is shown  
**Alignment output:** # nucleic acids per line: 50  
**TF output:** common TF matches located in aligned regions (common to 3 (100.0 %) sequences)  
**Family matches:** yes  
**MatInspector library:** Matrix Family Library Version 5.0 (February 2005)  
**Selected groups** (core/matrix sim):
 

- ALL vertebrates.lib (0.75/Optimized)

### Aligned Sequences:

| No. | Sequence Name | Sequence Description                                                                                                                                                                                                                               | Length  |
|-----|---------------|----------------------------------------------------------------------------------------------------------------------------------------------------------------------------------------------------------------------------------------------------|---------|
| 1   | P914276       | P914276 sym=NDUFS5 loc=Loc4725 taxid=9606 spec=Homo sapiens chr=1 ctg=NT_004511 str=(+) start=9463424 end=9464424 len=1001 tss=501 comm=NADH dehydrogenase (ubiquinone) Fe-S protein 5, 15kDa (NADH-coenzyme Q reductase); (NM_004552/501/bronze;) | 1001 bp |
| 2   | mNDUFS5       | mNDUFS5 m6_dna range=chr4:122744619-122745729 5'pad=0 3'pad=0 revComp=TRUE strand=? repeatMasking=none                                                                                                                                             | 1111 bp |
| 3   | P914277       | P914277 sym=naloc=Loc362588 taxid=10116 spec=Rattus norvegicus chr=5 ctg=NW_047719 str=(-) start=4185309 end=4186309 len=1001 tss=501 comm=similar to NADH dehydrogenase (ubiquinone) Fe-S protein 5; (XM_342907/501/bronze;)                      | 1001 bp |

### Alignment (DiAlign format):

Please note that only **upper-case** letters are considered to be **aligned**. For more information, please have a look at the user guide.

[V\\$FKHD](#) [V\\$SHOXF](#) [V\\$SEGRF](#) [V\\$SETSF](#)

```

alignment position 1 . . . . . 11 . . . . . 21 . . . . . 31 . . . . . 41 . . . . .
P914276      1 t g g c t a g g c c t t c c c t g t g t c t c t g t a a t t g a t g g g t t t g g g t t t t t t
mNDUFS5     1 T T A A A C C G A - - - - -
P914277     1 T T A A A C C G G - - - - -
          * * * * *
          * * * * *
          * * * * *
alignment position 5 1 . . . . . 6 1 . . . . . 7 1 . . . . . 8 1 . . . . . 9 1 . . . . .
    
```

|                    |     |                     |                            |                            |                     |                     |
|--------------------|-----|---------------------|----------------------------|----------------------------|---------------------|---------------------|
| <b>P914276</b>     | 51  | c c t t t c t c t c | t c t c t a c c t c        | c t c t c t c t c t        | t c t t c a t c c t | c t c t c t c t c a |
| <b>mNDFUS5</b>     | 10  | - - - - -           | - - - - -                  | - - - - -                  | - - - - -           | - - - - -           |
| <b>P914277</b>     | 10  | - - - - -           | - - - - -                  | - - - - -                  | - - - - -           | - - - - -           |
| alignment position |     | 1 0 1 . . . . .     | 1 1 1 . . . . .            | 1 2 1 . . . . .            | 1 3 1 . . . . .     | 1 4 1 . . . . .     |
| <b>P914276</b>     | 101 | c t c t c c c c c t | g a g a t a a g g t        | c t t g c t c t g t        | t g c c a g g g c t | g g a a t g c a a t |
| <b>mNDFUS5</b>     | 10  | - - - - -           | - - - - -                  | - - - - -                  | - - - - -           | - - - - -           |
| <b>P914277</b>     | 10  | - - - - -           | - - - - -                  | - - - - -                  | - - - - -           | - - - - -           |
| alignment position |     | 1 5 1 . . . . .     | 1 6 1 . . . . .            | 1 7 1 . . . . .            | 1 8 1 . . . . .     | 1 9 1 . . . . .     |
| <b>P914276</b>     | 151 | g g a a t g g t g t | g a t c a t g g c t        | c a c t a c a g c c        | t c a a t c t c c t | g g g c t c a a G G |
| <b>mNDFUS5</b>     | 10  | - - - - -           | - - - - -                  | - - - - -                  | - - - - -           | - - - - - G G       |
| <b>P914277</b>     | 10  | - - - - -           | - - - - -                  | - - - - -                  | - - - - -           | - - - - - G G       |
|                    |     |                     |                            |                            |                     | **                  |
|                    |     |                     |                            |                            |                     | **                  |
|                    |     |                     |                            |                            |                     | **                  |
| alignment position |     | 2 0 1 . . . . .     | 2 1 1 . . . . .            | 2 2 1 . . . . .            | 2 3 1 . . . . .     | 2 4 1 . . . . .     |
| <b>P914276</b>     | 201 | G A T C C T C C C A | C C T C A A C c t c        | c t g a g t a g c t        | g g a a c c a c a g | g c a t g c a c c a |
| <b>mNDFUS5</b>     | 12  | A C C T C T C C C A | G A T C A A C A a A        | T G C T C T T A A C        | C T C T G A G C T G | T C T C T C C A -   |
| <b>P914277</b>     | 12  | G C C T C T C C C A | G A G C A A C a c A        | T G C T C T T A A C        | C T C T G A G C T G | T C T C T T C A -   |
|                    |     | *****               | *****                      | *****                      | *****               | *****               |
|                    |     | *****               | *****                      | *****                      | *****               | *****               |
|                    |     | *****               | *****                      | *****                      | *****               | *****               |
|                    |     |                     |                            | *****                      | *****               | *****               |
| alignment position |     | 2 5 1 . . . . .     | 2 6 1 . . . . .            | 2 7 1 . . . . .            | 2 8 1 . . . . .     | 2 9 1 . . . . .     |
| <b>P914276</b>     | 251 | c c t c G C C C G G | <b>C T A A T T T T T T</b> | <b>A T T T t t t g t</b>   | a g a g a - - - - - | - - - - - G G G G A |
| <b>mNDFUS5</b>     | 60  | - - - - G C C C G G | <b>C T A T T A T G T T</b> | <b>T A T T A C C A A A</b> | A A G G G A A A C T | G C C A C c g t g a |
| <b>P914277</b>     | 60  | - - - - G C C a - G | <b>C C A T T A T G T T</b> | <b>T A T T A T C A G A</b> | A A A G A A A A C A | G T C A C G G A G A |
|                    |     | *****               | *****                      | *****                      | *****               | *****               |
|                    |     | *****               | *****                      | *****                      | *****               | *****               |
|                    |     | ***                 |                            |                            |                     |                     |
|                    |     | ***                 |                            |                            |                     |                     |
| alignment position |     | 3 0 1 . . . . .     | 3 1 1 . . . . .            | 3 2 1 . . . . .            | 3 3 1 . . . . .     | 3 4 1 . . . . .     |
| <b>P914276</b>     | 290 | G T T T C G C C A - | - T G T T G C C C A        | G G C T G T t t t c        | g a a c t c c t g g | g e t g a a - - -   |
| <b>mNDFUS5</b>     | 106 | a a c t g g g a a a | c A G T C A C A C A        | A G T T T T G G G G        | T C A C G G C A C A | C G A G C T T T A A |
| <b>P914277</b>     | 105 | G A T T G G G A G - | - A G T C A C C C A        | A G T T T T G G G G        | T C A C G G C C C A | C G A G C T T T A A |
|                    |     | *****               | *****                      | *****                      | *****               | *****               |
|                    |     | *****               | *****                      | *****                      | *****               | *****               |
|                    |     | *****               | *****                      | *****                      | *****               | *****               |
|                    |     | *****               | *****                      | *****                      | *****               | *****               |
| alignment position |     | 3 5 1 . . . . .     | 3 6 1 . . . . .            | 3 7 1 . . . . .            | 3 8 1 . . . . .     | 3 9 1 . . . . .     |
| <b>P914276</b>     | 334 | - - - - -           | - - - - -                  | - - - - -                  | - - - - -           | - - - - - G T G A   |
| <b>mNDFUS5</b>     | 156 | t c a c c a c a t t | t c C T T G G G G T        | G A G G G A A G C A        | C T A C T C T T T C | T C G A G T G T G A |
| <b>P914277</b>     | 153 | c c a c t a c g t t | t t C T T A G G G C        | G A G G G A A G C A        | A T A C T C T T T C | T C A A G T G T G A |
|                    |     |                     | *****                      | *****                      | *****               | *****               |
|                    |     |                     | *****                      | *****                      | *****               | *****               |
|                    |     |                     | *****                      | *****                      | *****               | *****               |
|                    |     |                     | *****                      | *****                      | *****               | *****               |
| alignment position |     | 4 0 1 . . . . .     | 4 1 1 . . . . .            | 4 2 1 . . . . .            | 4 3 1 . . . . .     | 4 4 1 . . . . .     |
| <b>P914276</b>     | 338 | T C T T C C T C c c | - - - - -                  | - - - - -                  | - - - - -           | - - - - -           |
| <b>mNDFUS5</b>     | 206 | C C T T G C T C A A | G T A G C A C A A C        | A A T C A A C G G T        | C A C G A C A G T G | C T g a a a g g g a |
| <b>P914277</b>     | 203 | C C T T G C T C A A | G T A G C A C A A C        | A A T C A A C T G T        | C A T G A C A G T G | C T g - - - - -     |
|                    |     | *****               | *****                      | *****                      | *****               | *****               |
|                    |     | *****               | *****                      | *****                      | *****               | *****               |
|                    |     | *****               | *****                      | *****                      | *****               | *****               |
|                    |     | *****               | *****                      | *****                      | *****               | *****               |
| alignment position |     | 4 5 1 . . . . .     | 4 6 1 . . . . .            | 4 7 1 . . . . .            | 4 8 1 . . . . .     | 4 9 1 . . . . .     |
| <b>P914276</b>     | 348 | - - - - -           | - - - - -                  | - - - - -                  | - - - - - T C A G C | C T T C C A - - - - |







| Extract alignment region         |                                                     |
|----------------------------------|-----------------------------------------------------|
| Positions in alignment           | from: <input type="text"/> to: <input type="text"/> |
| Output file                      | <input type="text" value="dialign.seq"/>            |
| <b>Extract aligned sequences</b> |                                                     |

For [comments](#), questions or bug reports, please contact [support@genomatix.de](mailto:support@genomatix.de)

© Genomatix Software GmbH 1998-2005  
- All rights reserved.

[License Agreement](#)

GEMS Launcher 4.1.1



|                    |     |             |             |             |              |                |
|--------------------|-----|-------------|-------------|-------------|--------------|----------------|
| <b>mNDUFS6</b>     | 51  | AACTgaACTA  | CTGCAGCGTT  | GCAAAAAATGC | TCAGAAATCT   | aaCTTTCCTA     |
| <b>rNDUFS6</b>     | 39  | AACTttACTA  | CCGCTGCATT  | GCAAAAAATGC | TCTTAAGTCT   | tcCTTTCCCA     |
|                    |     | *****       | *****       | *****       | *****        | *****          |
|                    |     | *****       | *****       | *****       | *****        | *****          |
|                    |     | *****       | *****       | *****       | *****        | *****          |
| alignment position | 101 | .....       | 111.....    | 121.....    | 131.....     | 141.....       |
| <b>P878337</b>     | 1   | -----       | -----       | -----       | TGCACTTC     | CAGTCTCGTCTGC  |
| <b>mNDUFS6</b>     | 101 | CACCAACATA  | CAGGACCAGG  | AGAGTTGACT  | GcacaactG    | TTCTTCTGC      |
| <b>rNDUFS6</b>     | 89  | CCCCAACATA  | CATAGCTAGG  | AAAGTTGACT  | GCATGTA      | CTGTGTTCTTCTAT |
|                    |     | *****       | *****       | *****       | *****        | *****          |
|                    |     | *****       | *****       | *****       | *****        | *****          |
|                    |     | *****       | *****       | *****       | *****        | *****          |
| alignment position | 151 | .....       | 161.....    | 171.....    | 181.....     | 191.....       |
| <b>P878337</b>     | 22  | TAAGCAGTTG  | ACTCCTTCAC  | CCAAataatt  | tgatatttaa   | atgtctcatg     |
| <b>mNDUFS6</b>     | 151 | TGAACAACCTT | ACTTCTTTAC  | TCAAAACAAA  | acagaaaca    | aaaaaacaac     |
| <b>rNDUFS6</b>     | 139 | TGAACAAGGT  | ATTTCTTTAC  | TGAAAACAAA  | taaaaatct    | -----          |
|                    |     | *****       | *****       | *****       | *****        | *****          |
|                    |     | *****       | *****       | *****       | *****        | *****          |
|                    |     | *****       | *****       | *****       | *****        | *****          |
| alignment position | 201 | .....       | 211.....    | 221.....    | 231.....     | 241.....       |
| <b>P878337</b>     | 72  | a-----      | -----       | TTATCGGT    | TACCATAAGA   | ATATAAACAA     |
| <b>mNDUFS6</b>     | 201 | caaccacGG   | AAAATCTGCA  | TTTTCTC     | CATGGCATAAAA | GCACACACAG     |
| <b>rNDUFS6</b>     | 177 | -----GG     | GAAATCTGCA  | TTTTCTC     | CATGCTATAAAA | GTGCACAC--     |
|                    |     | **          | *****       | *****       | *****        | *****          |
|                    |     | **          | *****       | *****       | *****        | *****          |
|                    |     | **          | *****       | *****       | *****        | *****          |
|                    |     | **          | *****       | *****       | *****        | *****          |
| alignment position | 251 | .....       | 261.....    | 271.....    | 281.....     | 291.....       |
| <b>P878337</b>     | 101 | TGTATTTTCA  | GTTTACATCC  | t----CCCC   | TGCCTgtccg   | ctaaataaga     |
| <b>mNDUFS6</b>     | 251 | CGCATCTTCA  | GTTTCCGTCC  | ccccaacCCCC | TGCCTTTGTC   | ACACTAGTAA     |
| <b>rNDUFS6</b>     | 217 | TGCATCTTCA  | GTTTTCATCC  | -----       | ---CTTTGTC   | ACGTTAGTAA     |
|                    |     | *****       | *****       | *****       | *****        | *****          |
|                    |     | *****       | *****       | *****       | *****        | *****          |
|                    |     | *****       | *****       | *****       | *****        | *****          |
| alignment position | 301 | .....       | 311.....    | 321.....    | 331.....     | 341.....       |
| <b>P878337</b>     | 146 | accactgggt  | actcctaatc  | gctgaagggt  | tgcacaccca   | tgcctgcct      |
| <b>mNDUFS6</b>     | 301 | CCTTTGAACA  | CT-----     | -----       | -----        | -----          |
| <b>rNDUFS6</b>     | 254 | ACTTTGAACA  | CG-----     | -----       | -----        | -----          |
|                    |     | *****       | **          | *****       | *****        | *****          |
|                    |     | *****       | **          | *****       | *****        | *****          |
|                    |     | *****       | **          | *****       | *****        | *****          |
| alignment position | 351 | .....       | 361.....    | 371.....    | 381.....     | 391.....       |
| <b>P878337</b>     | 196 | catcagggcc  | ctagctctag  | cctgcggctg  | caactgcatg   | aggctgcaac     |
| <b>mNDUFS6</b>     | 313 | -----       | -----       | -----       | -----        | -----          |
| <b>rNDUFS6</b>     | 266 | -----       | -----       | -----       | -----        | -----          |
| alignment position | 401 | .....       | 411.....    | 421.....    | 431.....     | 441.....       |
| <b>P878337</b>     | 246 | tgcggcgca   | acggggcgcg  | ttaactttta  | ggccattgat   | gaaaagtca      |
| <b>mNDUFS6</b>     | 313 | -----       | -----       | -----       | -----        | -----          |
| <b>rNDUFS6</b>     | 266 | -----       | -----       | -----       | -----        | -----          |
| alignment position | 451 | .....       | 461.....    | 471.....    | 481.....     | 491.....       |
| <b>P878337</b>     | 296 | acaaGCGCAC  | AGTactcgggt | gtaatcaggg  | gcatttttag   | cgagatacct     |
| <b>mNDUFS6</b>     | 313 | ---GCGCAC   | AGTTAAGCC-  | -----       | -----        | -----          |
| <b>rNDUFS6</b>     | 266 | ---GCGCAC   | AGTTAAGCT-  | -----       | -----        | -----          |
|                    |     | *****       | *****       | *****       | *****        | *****          |
|                    |     | *****       | *****       | *****       | *****        | *****          |
|                    |     | *****       | *****       | *****       | *****        | *****          |
| alignment position | 501 | .....       | 511.....    | 521.....    | 531.....     | 541.....       |









|                                                                                                                                        |                                   |                     |
|----------------------------------------------------------------------------------------------------------------------------------------|-----------------------------------|---------------------|
| <b>Output file</b>                                                                                                                     | dialign.seq                       |                     |
| <b>Extract aligned sequences</b>                                                                                                       |                                   |                     |
| For <a href="#">comments</a> , questions or bug reports, please contact <a href="mailto:support@genomatix.de">support@genomatix.de</a> |                                   |                     |
| © Genomatix Software GmbH 1998-2005<br>- All rights reserved.                                                                          | <a href="#">License Agreement</a> | GEMS Launcher 4.1.1 |

[Genomatix-Logo](#)      [Logout](#)      [Personal](#)      [Messages](#)      [GEMS-Logo](#)  
[Logout](#)      [Personal](#)      [Messages](#)

---

[Genomatix Main](#) [GEMSEI](#) [Dorado](#) [Gene2Promoter](#) [BiblioSphere](#)  
[Frequently asked questions](#) [Your Results](#) [Your Sequences](#) [Your Protocol](#) [Help](#)

---

**GEMS Launcher Task: *DiAlign TF*: Multiple alignment plus TF sites working on promoters.seq (3 seq.)**

---

[\[Alignment\]](#)   [\[Pairwise similarities\]](#)

---

**DiAlign professional TF Release 3.1 December 2004** **Tue Jun 7 23:49:38 2005**

---

### Solution parameters:

**Sequence file:** [promoters.seq](#) (3 seq.)  
**Type of sequences:** nucleotide sequences  
**Threshold T:** 0.00  
**\*! signs below alignment denote:** diagonal similarity (max. similarity is represented by 10 '!\*' signs)  
**Alignment output:** complete alignment is shown  
# nucleic acids per line: 50  
**TF output:** common TF matches located in aligned regions (common to 3 (100.0 %) sequences)  
**Family matches:** yes  
**MatInspector library:** Matrix Family Library Version 5.0 (February 2005)  
**Selected groups** (core/matrix sim):  

- ALL user\_defined.lib (0.75/Optimized)
- ALL vertebrates.lib (0.75/Optimized)

---

### Aligned Sequences:

| No. | Sequence Name | Sequence Description                                                                                                                                                                                                                                                                                                | Length  |
|-----|---------------|---------------------------------------------------------------------------------------------------------------------------------------------------------------------------------------------------------------------------------------------------------------------------------------------------------------------|---------|
| 1   | P968931       | sym=NDUFS7 loc=Loc374291 taxid=9606 spec=Homo sapiens chr=19 ctg=NT_011255 str=(+) start=1323383 end=1324406  len=1024 tss=501,507,521,524 comm=NADH dehydrogenase (ubiquinone) Fe-S protein 7, 20kDa (NADH-coenzyme Q reductase); (AK092169/501/gold; AK091623/521/gold; AK128713/507/gold; NM_024407/524/bronze;) | 1024 bp |
| 2   | P968933       | sym=Ndufs7 loc=Loc75406 taxid=10090 spec=Mus musculus chr=10 ctg=NT_039496 str=(+) start=6105465 end=6106465  len=1001 tss=501 comm=NADH dehydrogenase (ubiquinone) Fe-S protein 7; (NM_029272/517/bronze;)                                                                                                         | 1001 bp |
| 3   | P968934       | sym=nalloc loc=Loc362837 taxid=10116 spec=Rattus norvegicus chr=7 ctg=NW_047773 str=(-) start=10970711 end=10971711  len=1001 tss=501 comm=similar to NADH dehydrogenase (ubiquinone) Fe-S protein 7; (XM_343165/511/bronze;)                                                                                       | 1001 bp |

---

### Alignment (DiAlign format):

Please note that only **upper-case** letters are considered to be **aligned**. For more information, please have a look at the user guide.

V\$GATA V\$VMYB V\$RORA V\$NRFI V\$NRRI V\$TEAF V\$DEA V\$LTUP V\$FKHD V\$IRFF V\$SETSF V\$BARB  
V\$PCAT V\$HAML V\$MINI V\$EKL V\$GLIF V\$YYIF

```

alignment position 1 . . . . . 11 . . . . . 21 . . . . . 31 . . . . . 41 . . . . .
P968931          1 - - - - - - - - - - - - - - - - - - - - - - - - - - - - - - - - A G G G A C C T
P968933          1 g t t a a a a c a c t - - - - - - - - - - T G C C G A A A C C C G G G A T C G A A C C A G G G A C C T
P968934          1 g t c g a t g g g a t a a a a c c t c T G C C G A A A C C C G G G A T C G A A C C A G G G A C C T
    
```



|                    |                         |                     |                     |                            |                            |           |
|--------------------|-------------------------|---------------------|---------------------|----------------------------|----------------------------|-----------|
|                    |                         | * * * * *           | * * * * *           | * * * * *                  | * * * * *                  | * * * * * |
| alignment position | 301 . . . . .           | 311 . . . . .       | 321 . . . . .       | 331 . . . . .              | 341 . . . . .              |           |
| <b>P968931</b>     | 258 - - G T G A - C T T | T T G C C C T C C T | G G A A T A A C A A | G A A A A T G A G T        | G T c g c c t c t g        |           |
| <b>P968933</b>     | 286 c a G C G A - C T T | T T T C A T T C C C | T A A T A C T G A A | T A A A G T G G A A        | G T T C T T T A - -        |           |
| <b>P968934</b>     | 294 t g a t t c g C C T | T T T T G T C C C C | T A A T t - T G A G | T A A A A T A G A A        | G T T T T T T C - -        |           |
|                    |                         | * * * * *           | * * * * *           | * * * * *                  | * * * * *                  |           |
| alignment position | 351 . . . . .           | 361 . . . . .       | 371 . . . . .       | 381 . . . . .              | 391 . . . . .              |           |
| <b>P968931</b>     | 305 t T T T T G T C G g | t c c g c c g c a g | a c c c g c g g c c | c c c a c g t - - G        | C G C A C T C c g a        |           |
| <b>P968933</b>     | 333 - T T T T G T C G c | T G T T T C C T G T | T T G T C A C A G G | A C G A C C G T G G        | C G C A C T C T G C        |           |
| <b>P968934</b>     | 341 - T T T T G T C - - | T G T T T C C T G T | T T G T C A C A G G | A G G A C G G T T G        | T G T A C A C T G C        |           |
|                    |                         | * * * * *           | * * * * *           | * * * * *                  | * * * * *                  |           |
| alignment position | 401 . . . . .           | 411 . . . . .       | 421 . . . . .       | 431 . . . . .              | 441 . . . . .              |           |
| <b>P968931</b>     | 353 t g a c c t t t c c | g c c t c g g g t g | a t c t g g g g g t | g c a c g g c g c a        | A C A C G A C C A C        |           |
| <b>P968933</b>     | 382 g C G G - - - - -   | - - - - -           | - - - - -           | - - - - -                  | A C G C G A C C A C        |           |
| <b>P968934</b>     | 388 t C G G - - - - -   | - - - - -           | - - - - -           | - - - - -                  | G C G C G A T C A C        |           |
|                    |                         | * * *               |                     |                            | * * * * * * * * *          |           |
|                    |                         | * * *               |                     |                            | * * * * * * * * *          |           |
| alignment position | 451 . . . . .           | 461 . . . . .       | 471 . . . . .       | 481 . . . . .              | 491 . . . . .              |           |
| <b>P968931</b>     | 403 g g a g g c c g A A | A G C G C A G C G G | A A C C T C C C G G | C T C C A G G T T C        | C G G T T T C C g c        |           |
| <b>P968933</b>     | 396 A G G T A T - - A A | A G C G G G T C A G | A A C C A C T C G G | C T T G T G G T G C        | G G G T T T C C G C        |           |
| <b>P968934</b>     | 402 A G G A A A - - A A | A G C G G G T C G G | A A C C G C T C A G | T T T G T G G T T C        | C G G T T T C C G C        |           |
|                    |                         | * * * * *           | * * * * *           | * * * * *                  | * * * * *                  |           |
|                    |                         | * * * * *           | * * * * *           | * * * * *                  | * * * * *                  |           |
|                    |                         |                     |                     | * * * * *                  | * * * * *                  |           |
|                    |                         |                     |                     | * * * * *                  | * * * * *                  |           |
| alignment position | 501 . . . . .           | 511 . . . . .       | 521 . . . . .       | 531 . . . . .              | 541 . . . . .              |           |
| <b>P968931</b>     | 453 a t g c g c t c c g | a g c c g c T T T G | G G C G G C G G C C | C C G g g a a c C C        | G G A G C G C T A A        |           |
| <b>P968933</b>     | 444 T G G T G T C T A - | - - - - - T T T G   | G G C G T T G G a c | t A G A A - - C C          | G G A A C T C T T T        |           |
| <b>P968934</b>     | 450 T G G T G T C T A - | - - - - - T T T G   | G G C G T T G G A C | C A G A A - - C C          | G G A A C T C T T T        |           |
|                    |                         | * * * * *           | * * * * *           | * * * * *                  | * * * * *                  |           |
|                    |                         | * * * * *           | * * * * *           | * * * * *                  | * * * * *                  |           |
|                    |                         | * * * * *           | * * * * *           | * * * * *                  | * * * * *                  |           |
|                    |                         | * * * * *           | * * * * *           | * * * * *                  | * * * * *                  |           |
|                    |                         |                     |                     | * * * * *                  | * * * * *                  |           |
|                    |                         |                     |                     | * * * * *                  | * * * * *                  |           |
|                    |                         |                     |                     | * * * * *                  | * * * * *                  |           |
| alignment position | 551 . . . . .           | 561 . . . . .       | 571 . . . . .       | 581 . . . . .              | 591 . . . . .              |           |
| <b>P968931</b>     | 503 G G A G A A C G G A | C C T C A G A G G T | T G T C T G A A G G | C <b>C G A G G C C A A</b> | <b>G A T G G C G G T G</b> |           |
| <b>P968933</b>     | 484 G G A G G A C G G A | C C G C A G A G G T | T G T C T G A A G G | C <b>C G A G G C C A A</b> | <b>G A T G G C G G C G</b> |           |
| <b>P968934</b>     | 490 G G A A G A C G G A | C C G C A G A G G T | T G T C T G A A G G | C <b>C G A G G C C A A</b> | <b>G A T G G C G G C G</b> |           |
|                    |                         | * * * * *           | * * * * *           | * * * * *                  | * * * * *                  |           |
|                    |                         | * * * * *           | * * * * *           | * * * * *                  | * * * * *                  |           |
|                    |                         | * * * * *           | * * * * *           | * * * * *                  | * * * * *                  |           |
|                    |                         | * * * * *           | * * * * *           | * * * * *                  | * * * * *                  |           |
|                    |                         | * * * * *           | * * * * *           | * * * * *                  | * * * * *                  |           |
|                    |                         | * * * * *           | * * * * *           | * * * * *                  | * * * * *                  |           |
|                    |                         |                     |                     | * * * * *                  | * * * * *                  |           |
|                    |                         |                     |                     | * * * * *                  | * * * * *                  |           |
| alignment position | 601 . . . . .           | 611 . . . . .       | 621 . . . . .       | 631 . . . . .              | 641 . . . . .              |           |
| <b>P968931</b>     | 553 C T G T C A G G T G | A G c g c g g c a c | c g g c g g c g g g | t g t g g g g c c g        | c g c g g g t c t g        |           |
| <b>P968933</b>     | 534 C T G G C G G G T G | A G T G a a g c c c | t T G C G G T C - - | - - - - -                  | - - - - -                  |           |
| <b>P968934</b>     | 540 C T G G C G G G T G | A G T G a a g a t c | - T G A G A T C - - | - - - - -                  | - - - - -                  |           |
|                    |                         | * * * * *           | * * * * *           |                            |                            |           |
|                    |                         | * * * * *           | * * * * *           |                            |                            |           |
|                    |                         | * * * * *           | * * * * *           |                            |                            |           |
|                    |                         | * * * * *           | * * * * *           |                            |                            |           |
|                    |                         | * * * * *           | * * * * *           |                            |                            |           |
|                    |                         | * * * * *           | * * * * *           |                            |                            |           |
|                    |                         | * * * * *           | * * * * *           |                            |                            |           |
|                    |                         | * * * * *           | * * * * *           |                            |                            |           |
| alignment position | 651 . . . . .           | 661 . . . . .       | 671 . . . . .       | 681 . . . . .              | 691 . . . . .              |           |

|                    |     |                                         |                                     |                     |                       |                     |                     |                     |                            |                   |            |
|--------------------|-----|-----------------------------------------|-------------------------------------|---------------------|-----------------------|---------------------|---------------------|---------------------|----------------------------|-------------------|------------|
| <b>P968931</b>     | 603 | g g g c c g t g g g a g c c t c g       | GGT                                 | GTC                 | GTG                   | GTGG                | CGT                 | CGGGGGt             | c g g t g c c g g c        |                   |            |
| <b>P968933</b>     | 562 | - - - - -                               | GGG                                 | AGA                 | GTG                   | GCGT                | AGT                 | CCT GGG-            | - - - - -                  |                   |            |
| <b>P968934</b>     | 567 | - - - - -                               | GGG                                 | GT A                | GTG                   | GCGC                | AGT                 | CCT GGG-            | - - - - -                  |                   |            |
|                    |     |                                         | *                                   | *                   | *                     | *                   | *                   | *                   | *                          |                   |            |
|                    |     |                                         | *                                   | *                   | *                     | *                   | *                   | *                   | *                          |                   |            |
| alignment position |     | 701 . . . . .                           | 711 . . . . .                       | 721 . . . . .       | 731 . . . . .         | 741 . . . . .       |                     |                     |                            |                   |            |
| <b>P968931</b>     | 653 | g t c g t g g c c g c g g t c c t c t c | c g g                               | g c t t             | CTC                   | CGA                 | GCC                 | GGCc                | g c t - - - - C            |                   |            |
| <b>P968933</b>     | 584 | - - - - -                               | - - - - -                           | - - - - -           | CTC                   | CGA                 | GCT                 | GGCg                | c t g CGGGGAC              |                   |            |
| <b>P968934</b>     | 589 | - - - - -                               | - - - - -                           | - - - - -           | CCT                   | CGA                 | GCT                 | GGg c               | t t - CGGGGAC              |                   |            |
|                    |     |                                         | *                                   | *                   | *                     | *                   | *                   | *                   | *                          |                   |            |
|                    |     |                                         | *                                   | *                   | *                     | *                   | *                   | *                   | *                          |                   |            |
|                    |     |                                         | *                                   | *                   | *                     | *                   | *                   | *                   | *                          |                   |            |
| alignment position |     | 751 . . . . .                           | 761 . . . . .                       | 771 . . . . .       | 781 . . . . .         | 791 . . . . .       |                     |                     |                            |                   |            |
| <b>P968931</b>     | 697 | CTC                                     | GGGCTCC                             | CCGCCCGGc           | t t g c g a t g a a c | g g t c g c c g t t | a t t g c g t - - - |                     |                            |                   |            |
| <b>P968933</b>     | 607 | CTT                                     | GGAGCCC                             | AAGCCTAGT           | G TTG                 | AGA                 | GGCG                | TTG                 | g g a c c g t - - AGAGACCT |                   |            |
| <b>P968934</b>     | 611 | CTT                                     | GGAGCCC                             | AAGCCCGGT           | A TTG                 | ACA                 | GGCG                | TTG                 | g g a t c g c a g AGAGACCT |                   |            |
|                    |     |                                         | *                                   | *                   | *                     | *                   | *                   | *                   | *                          |                   |            |
|                    |     |                                         | *                                   | *                   | *                     | *                   | *                   | *                   | *                          |                   |            |
|                    |     |                                         | *                                   | *                   | *                     | *                   | *                   | *                   | *                          |                   |            |
| alignment position |     | 801 . . . . .                           | 811 . . . . .                       | 821 . . . . .       | 831 . . . . .         | 841 . . . . .       |                     |                     |                            |                   |            |
| <b>P968931</b>     | 744 | - - - - -                               | - - - - -                           | - - - - -           | - - - - -             | - - - - -           | - - - - -           | - - - - -           | - - - - -                  |                   |            |
| <b>P968933</b>     | 655 | ATA                                     | GGTCAGA                             | TCCCAGCCC           | T CGG                 | TAA                 | TGTC                | G Gt g              | TCTAGC                     | ATT               | AGGCCGA    |
| <b>P968934</b>     | 661 | ATA                                     | GGTCAGA                             | ACCCAGCCC           | G CGA                 | TAG                 | TGTC                | G Gg a              | TCTAGG                     | ATT               | GGGCCGA    |
|                    |     |                                         | *                                   | *                   | *                     | *                   | *                   | *                   | *                          | *                 | *          |
|                    |     |                                         | *                                   | *                   | *                     | *                   | *                   | *                   | *                          | *                 | *          |
|                    |     |                                         | *                                   | *                   | *                     | *                   | *                   | *                   | *                          | *                 | *          |
| alignment position |     | 851 . . . . .                           | 861 . . . . .                       | 871 . . . . .       | 881 . . . . .         | 891 . . . . .       |                     |                     |                            |                   |            |
| <b>P968931</b>     | 744 | - - - - -                               | - - - - -                           | - - - - -           | - - - - -             | - - - - -           | - - - - -           | - - - - -           | - - - - -                  | - - - - -         |            |
| <b>P968933</b>     | 705 | AGC                                     | ATGTTTG                             | AATTCACg            | t t                   | ACAC                | CAGTTCT             | G                   | CATGGTCTA                  | C                 | ATAGCAAAGT |
| <b>P968934</b>     | 711 | AGT                                     | GTGTTTG                             | AATCCACt            | t c                   | ACAC                | CAGTTAT             | G                   | TCTGGTCTA                  | C                 | CTAGCAAAGT |
|                    |     |                                         | *                                   | *                   | *                     | *                   | *                   | *                   | *                          | *                 | *          |
|                    |     |                                         | *                                   | *                   | *                     | *                   | *                   | *                   | *                          | *                 | *          |
| alignment position |     | 901 . . . . .                           | 911 . . . . .                       | 921 . . . . .       | 931 . . . . .         | 941 . . . . .       |                     |                     |                            |                   |            |
| <b>P968931</b>     | 744 | - - - - -                               | - - - - -                           | - - - - -           | - - - - -             | - - - - -           | - - - - -           | - - - - -           | - - - - -                  | - - - - -         |            |
| <b>P968933</b>     | 755 | TGC                                     | AGGCCTC                             | c t g c t a t c g t | c                     | CC                  | TGATTAT             | AGT                 | CGGGAAC                    | G                 | CTGAGGCCT  |
| <b>P968934</b>     | 761 | TCC                                     | AGGCCTC                             | c c a t t a c t g c | a g                   | C                   | AGATTGT             | AGT                 | TGTGGAC                    | G                 | CTGAGGCCT  |
|                    |     |                                         | *                                   | *                   | *                     | *                   | *                   | *                   | *                          | *                 | *          |
|                    |     |                                         | *                                   | *                   | *                     | *                   | *                   | *                   | *                          | *                 | *          |
| alignment position |     | 951 . . . . .                           | 961 . . . . .                       | 971 . . . . .       | 981 . . . . .         | 991 . . . . .       |                     |                     |                            |                   |            |
| <b>P968931</b>     | 773 | Gg                                      | t a g g t c a t g a c g c a a g c c | t c c a g c c t c a | g g a a g g c g       | CT                  | CGGGGT              | GGAG                |                            |                   |            |
| <b>P968933</b>     | 805 | GTG                                     | TATCTTC                             | CAAC-               | - - - - -             | - - - - -           | - - - - -           | CT                  | CAGg a a g                 | CTG               |            |
| <b>P968934</b>     | 811 | GT A                                    | TATCTCT                             | CAAT-               | - - - - -             | - - - - -           | - - - - -           | CT                  | CAGGAGACTG                 |                   |            |
|                    |     |                                         | *                                   | *                   | *                     | *                   | *                   | *                   | *                          | *                 |            |
|                    |     |                                         | *                                   | *                   | *                     | *                   | *                   | *                   | *                          | *                 |            |
| alignment position |     | 1001 . . . . .                          | 1011 . . . . .                      | 1021 . . . . .      | 1031 . . . . .        | 1041 . . . . .      |                     |                     |                            |                   |            |
| <b>P968931</b>     | 823 | GCT                                     | GGAGGGG                             | CCCCATTCAC          | GT                    | CCC                 | GAg a               | c c a g g g c a c g | g c c c g c g a g g        |                   |            |
| <b>P968933</b>     | 831 | ACT                                     | GCAGAAA                             | CCCGCTGAT           | GT                    | CCC                 | GAAG                | C                   | ACAGAg t g g               | g a c a - - - - - |            |
| <b>P968934</b>     | 837 | AT T                                    | GCAGGAG                             | CCCAGCTAAT          | GAC                   | CCT                 | GAAG                | C                   | T C AGA c a g - - - - -    |                   |            |
|                    |     |                                         | *                                   | *                   | *                     | *                   | *                   | *                   | *                          | *                 |            |
|                    |     |                                         | *                                   | *                   | *                     | *                   | *                   | *                   | *                          | *                 |            |
| alignment position |     | 1051 . . . . .                          | 1061 . . . . .                      | 1071 . . . . .      | 1081 . . . . .        | 1091 . . . . .      |                     |                     |                            |                   |            |
| <b>P968931</b>     | 873 | ct                                      | g c t c t t g a g a t g c c c t g g | a g a g a g c g g g | g c c t g c c t g a   | c a g g c t g g g a |                     |                     |                            |                   |            |
| <b>P968933</b>     | 875 | - - - - -                               | - - - - -                           | - - - - -           | - - - - -             | - - - - -           | - - - - -           | - - - - -           | - - - - -                  |                   |            |
| <b>P968934</b>     | 876 | - - - - -                               | - - - - -                           | - - - - -           | - - - - -             | - - - - -           | - - - - -           | - - - - -           | - - - - -                  |                   |            |
| alignment position |     | 1101 . . . . .                          | 1111 . . . . .                      | 1121 . . . . .      | 1131 . . . . .        | 1141 . . . . .      |                     |                     |                            |                   |            |
| <b>P968931</b>     | 923 | a a c t g a g g c c                     | c a t t g a g g g t                 | c t t c g a g g t c | a c a g g g c c g g   | g c c TGGGAAG       |                     |                     |                            |                   |            |
| <b>P968933</b>     | 875 | - - - - -                               | - - - - -                           | - - - - -           | - - - - -             | - - - - -           | - - - - -           | - - - - -           | - - - - -                  |                   |            |















## Extract aligned sequences

---

For [comments](#), questions or bug reports, please contact [support@genomatix.de](mailto:support@genomatix.de)

---

© Genomatix Software GmbH 1998-2005  
- All rights reserved.

[License Agreement](#)

GEMS Launcher 4.1.1

[Genomatix-Logo](#)      [Logout](#)      [Personal](#)      [Messages](#)      [GEMS-Logo](#)  
[Logout](#)      [Personal](#)      [Messages](#)

---

[Genomatix Main](#) [GEMSEI](#) [Dorado](#) [Gene2Promoter](#) [BiblioSphere](#)  
[Frequently asked questions](#) [Your Results](#) [Your Sequences](#) [Your Protocol](#) [Help](#)

---

**GEMS Launcher Task: *DiAlign TF*: Multiple alignment plus TF sites working on promoters.seq (3 seq.)**

---

[\[Alignment\]](#)   [\[Pairwise similarities\]](#)

---

**DiAlign professional TF Release 3.1 December 2004** **Wed Jun 8 00:54:44 2005**

---

### Solution parameters:

**Sequence file:** [promoters.seq](#) (3 seq.)  
**Type of sequences:** nucleotide sequences  
**Threshold T:** 0.00  
**'\*' signs below alignment denote:** diagonal similarity (max. similarity is represented by 10 '\*' signs)  
**Alignment output:** complete alignment is shown  
# nucleic acids per line: 50  
**TF output:** common TF matches located in aligned regions (common to 3 (100.0 %) sequences)  
**Family matches:** yes  
**MatInspector library:** Matrix Family Library Version 5.0 (February 2005)  
**Selected groups** (core/matrix sim):  

- ALL user\_defined.lib (0.75/Optimized)
- ALL vertebrates.lib (0.75/Optimized)

---

### Aligned Sequences:

| No. | Sequence Name | Sequence Description                                                                                                                                                                                                                                 | Length  |
|-----|---------------|------------------------------------------------------------------------------------------------------------------------------------------------------------------------------------------------------------------------------------------------------|---------|
| 1   | P937020       | sym=NDUFV1 loc=Loc4723 taxid=9606 spec=Homo sapiens chr=11 ctg=NT_033903 str=(+) start=12679702 end=12680702 len=1001 tss=501 comm=NADH dehydrogenase (ubiquinone) flavoprotein 1, 51kDa; (NM_007103/537/bronze;)                                    | 1001 bp |
| 2   | P937022       | sym=Ndufv1 loc=Loc17995 taxid=10090 spec=Mus musculus chr=19 ctg=NT_082868 str=(-) start=800669 end=801695 len=1027 tss=501,522,527 comm=NADH dehydrogenase (ubiquinone) flavoprotein 1; (AK075692/527/gold;AK005021/522/gold;NM_133666/501/bronze;) | 1027 bp |
| 3   | P937024       | sym=naloc=Loc293655 taxid=10116 spec=Rattus norvegicus chr=1 ctg=NW_047563 str=(-) start=15125430 end=15126430 len=1001 tss=501 comm=similar to NADH dehydrogenase (ubiquinone) flavoprotein 1; (XM_215176/531/bronze;)                              | 1001 bp |

---

### Alignment (DiAlign format):

Please note that only **upper-case** letters are considered to be **aligned**. For more information, please have a look at the user guide.

V\$HOME
V\$NKXH
V\$TEAF
V\$SETF
V\$E2FF
V\$SHOXH
V\$TALE
V\$HMTB

alignment position 1 . . . . . 1 1 . . . . . 2 1 . . . . . 3 1 . . . . . 4 1 . . . . .

**P937020** 1 g a - - - - - . . . . . - - - - - . . . . . - - - - - . . . . . - - - - - . . . . .

**P937022** 1 a a g g t t t a c a g a c a c a c a g c c c t g a g a a g t c c t a t g c a a a g g t t c t g g g g

**P937024** 1 - - - - - . . . . . - - - - - . . . . . - - - - - . . . . . - - - - - . . . . .





```

          * * * * *
          * * * * *
alignment position 4 5 1 . . . . . 4 6 1 . . . . . 4 7 1 . . . . . 4 8 1 . . . . . 4 9 1 . . . . .
P937020 325 g g a c c c c a g g c c g g t G GGAC CACATCTCCC AGAAGCCC c g g c g c c a a g g c
P937022 363 - - - - - - - - - - - T GGAC TACATCTCCC AGAAGGCC t A GC AC GAGAGT
P937024 315 - - - - - - - - - - - G GGAC TACATCTCCC AGAAG a a c c A GT ACCAGAAT
          * * * * *
          * * * * *
          * * * * *
          * * * * *
          * * * * *
alignment position 5 0 1 . . . . . 5 1 1 . . . . . 5 2 1 . . . . . 5 3 1 . . . . . 5 4 1 . . . . .
P937020 375 a c - - - - - - - - - - - TGGC CTC TCAGTCC TC CCC CGA GG AG GCGGGGCC
P937022 398 AAATT TCCGG T CT CTG TGCC CGC GCACC t t - - - - - AGT GG GCGGAGCC
P937024 350 AAATT TCCGG T CT CTG TGCC CTC GCACCCC TT AGT GAGGG GG GTGGGGg g
          * * * * *
          * * * * *
          * * * * *
          * * * * *
          * * * * *
alignment position 5 5 1 . . . . . 5 6 1 . . . . . 5 7 1 . . . . . 5 8 1 . . . . . 5 9 1 . . . . .
P937020 411 GCTGGCG- - - - - - - AAG TTG AAGGGg c GC AGC GAT AC CGGTGCGCGG
P937022 442 GAGGACA- - - - - - - GAG CTC AAAGG- A AC GGA GGT CC CT GGACACGC
P937024 400 a a g g a g c g c g g a g c g t g GAG CGC GAAGG- C GC GGA GGT AT CT GGACACGC
          * * * * *
          * * * * *
          * * * * *
          * * * * *
          * * * * *
alignment position 6 0 1 . . . . . 6 1 1 . . . . . 6 2 1 . . . . . 6 3 1 . . . . . 6 4 1 . . . . .
P937020 451 CGCTGGCGT C - GGGCGCGT ACGTCTTTC TGCGCG CC AC Ct a - - - - - G
P937022 481 CACTGGCTGC - GATGTGT ACGCACTTC TGTGCG CT CC CC A c CCCGTG
P937024 449 CTCTGGCT g c g GGACGTGT ACGCACTTC TGTGCG CC CC CC A - CCCGTG
          * * * * *
          * * * * *
          * * * * *
          * * * * *
          * * * * *
          * * * * *
alignment position 6 5 1 . . . . . 6 6 1 . . . . . 6 7 1 . . . . . 6 8 1 . . . . . 6 9 1 . . . . .
P937020 494 CG TCTCTATC GCGCCAGTTC CTC AGc c t c a g t g c t a TGA GGTGACAGCG
P937022 530 TG TTTCTGT GCGCCGGTTC CGC GGTT CGG AGTTG- TGA GGTGACAGCC
P937024 498 TG TTTCTGT GCGCCGGTTC CTC GGTT CGG AGTTG- TGA GGTGACAGCC
          * * * * *
          * * * * *
          * * * * *
          * * * * *
          * * * * *
          * * * * *
          * * * * *
          * * * * *
          * * * * *
          * * * * *
          * * * * *
alignment position 7 0 1 . . . . . 7 1 1 . . . . . 7 2 1 . . . . . 7 3 1 . . . . . 7 4 1 . . . . .
P937020 544 TGAGGTGACC C AT CTG GCc c g CC GCGATGC TG GCA ACA CG GC GGCTGCTC
P937022 579 GGAGGTGACC C GT CTG GCTC - CC GCGATGC TA GCG GCA CG GC ATTTTCTC
P937024 547 GGAGGTGACt g g t c c GCTT - CC GCGATGC TA GCA GCA CG GC ATTTTCTC
          * * * * *
          * * * * *
          * * * * *
          * * * * *
          * * * * *
          * * * * *
          * * * * *
          * * * * *
          * * * * *
          * * * * *
          * * * * *
alignment position 7 5 1 . . . . . 7 6 1 . . . . . 7 7 1 . . . . . 7 8 1 . . . . . 7 9 1 . . . . .
P937020 594 GGCTGGTCGC T TC CCG CGC G GGT ATCTGT CG TTT CAG CG GC GACACGGT
P937022 628 GGCGGGTTGG T TC CCG TGC G GGT ATCTGT CG TTT CAG CA GC GGCACGGT
P937024 596 GGCGGGTCGG T TC CCG TGC G GGT ATCTGT CG TCT CAG CA GC GGCACGGT

```

```
*****
*****
*****
*****
*****
*****
*****
*****
*****
*****
alignment position 801 . . . . . 811 . . . . . 821 . . . . . 831 . . . . . 841 . . . . .
P937020 644 GAGGCCAGC CTGGCTGGGG CCA CGGGTGT TTGGG GCCGG GTGt c g c g g c
P937022 678 Ga - GCCCGCC CTGATT CAGG CCC ACGCCTA TGCGG GAGGA GTGg c g a GCG
P937024 646 GAGGCCACC CTGATT CTGG CCT GGGGTGT ATGc - - - - - - - - - - GTG
*****
*****
*
*
*
alignment position 851 . . . . . 861 . . . . . 871 . . . . . 881 . . . . . 891 . . . . .
P937020 694 c g c g c c c g t g c a c g a g c a g t c c c t g GGGTC TG TAGTGGCC TCTGGAGAGC
P937022 727 GCGAGC- - - - - - - - - - - - - - - - GGGAT TG TGGTCC CC TCTGCAGAGT
P937024 683 GCGAGC- - - - - - - - - - - - - - - - GGGGT TT GGT TCC CC c g g t a g a a g -
*****
*****
*****
alignment position 901 . . . . . 911 . . . . . 921 . . . . . 931 . . . . . 941 . . . . .
P937020 744 CCTt c t c c c c a g g c c a g g c g g g a a g g c c c c g c t C C G G C C T G G T T G A A g t
P937022 758 CCTCTCCTCT CCGAGC TACC AC- - - - - - - - - - CCGGTC TGGATAAAAA
P937024 713 CCTCTCCTCT CCGGGC TACT AC- - - - - - - - - - CCGGCC TGGATTAAAA
*****
*****
*****
*****
*****
alignment position 951 . . . . . 961 . . . . . 971 . . . . . 981 . . . . . 991 . . . . .
P937020 794 a g g g g a a c g G G T C C C A A C G C G G G G C C G A C T C C C T t g a c c c t c t g a c t t g c
P937022 796 c t - A A C - - - G G T C C C A A C T C C A G G C T G A C G A T G T C C A G t C C A - - - - -
P937024 751 a t g A G C - - - G G T T C C A A C T C G G G A C T G A T G C T C T C C G G - C C A - - - - -
***
*
*
*
*
*
*
*
*
*
*
alignment position 1001 . . . . . 1011 . . . . . 1021 . . . . . 1031 . . . . . 1041 . . . . .
P937020 844 t g G C T T C C C T T G T T T T A C A G T C C T C G G C C T G G C G G - A A G T T T T G C A G G T T
P937022 834 - - G C T A C T C T T G T T T T A A C A A C C C C G T C T T G G G G T g A G G G T T T G C A G G T G
P937024 789 - - G C C T C T C T T G T T T T A A C A A C C T C G T C C T A G G G T - A A G G T T T G C A G G T T
*****
*****
*****
*****
*****
*****
*****
alignment position 1051 . . . . . 1061 . . . . . 1071 . . . . . 1081 . . . . . 1091 . . . . .
P937020 893 GTGAAGACC C T A G t c t t t c a - T T C T C T C C T T G T C A C A G C C T T G T A G G G C
P937022 882 TTGAGGCGT C T T A G A T A A T C T G T T A T T T C T T C T C G C A G C C C T A C C G G G T
P937024 836 TTGAGGCAT C T T A G C T A G T C T G T g t t n c t n c t n c g c a g n c t t t c n g n n n n
*****
*****
*****
*****
*****
alignment position 1101 . . . . . 1111 . . . . . 1121 . . . . . 1131 . . . . . 1141 . . . . .
P937020 942 GTGAa g G G G T C A T T G C C C C A T T T a g g - - - - - - - - - - - - - - - -
P937022 932 ATCA- - G G G T C T T C G C C C C A T T T c a a a g t t c a g a a a c a g t t t t g a a A A A
P937024 886 n c g n n n t n n c c c c n n n t g n n g t n n c a g a a n n c a n n t n n g n - - - - - A A A
***
*
*
*
*
*
*
*
*
*
*
alignment position 1151 . . . . . 1161 . . . . . 1171 . . . . . 1181 . . . . . 1191 . . . . .
```



[Genomatix-Logo](#)      [Logout](#)      [Personal](#)      [Messages](#)      [GEMS-Logo](#)  
[Logout](#)      [Personal](#)      [Messages](#)  


---

[Genomatix Main](#) [GEMSEI](#) [Dorado](#) [Gene2](#) [Promoter](#) [BiblioSphere](#)  
[Frequently asked questions](#) [Your Results](#) [Your Sequences](#) [Your Protocol](#) [Help](#)  


---

**GEMS Launcher Task: *DiAlign TF*: Multiple alignment plus TF sites working on promoters.seq (3 seq.)**  


---

[\[Alignment\]](#) [\[Pairwise similarities\]](#)

DiAlign professional TF Release 3.1 December 2004

Wed Jun 8 04:29:52 2005

### Solution parameters:

**Sequence file:** [promoters.seq](#) (3 seq.)  
**Type of sequences:** nucleotide sequences  
**Threshold T:** 0.00  
**\*! signs below alignment denote:** diagonal similarity (max. similarity is represented by 10 '! ' signs)  
**Alignment output:** complete alignment is shown  
# nucleic acids per line: 50  
**TF output:** common TF matches located in aligned regions (common to 3 (100.0 %) sequences)  
**Family matches:** yes  
**MatInspector library:** Matrix Family Library Version 5.0 (February 2005)  

- ALL user\_defined.lib (0.75/Optimized)
- ALL vertebrates.lib (0.75/Optimized)

**Selected groups** (core/matrix sim):

### Aligned Sequences:

| No. | Sequence Name | Sequence Description                                                                                                                                                                                                          | Length  |
|-----|---------------|-------------------------------------------------------------------------------------------------------------------------------------------------------------------------------------------------------------------------------|---------|
| 1   | P964855       | sym=NDUFV2 loc=Loc4729 taxid=9606 spec=Homo sapiens chr=18 ctg=NT_010859 str=(+) start=9092225 end=9093225 len=1001 tss=501 comm=NADH dehydrogenase (ubiquinone) flavoprotein 2, 24kDa; (NM_021074/522/silver;)               | 1001 bp |
| 2   | P964858       | sym=Ndufv2 loc=Loc72900 taxid=10090 spec=Mus musculus chr=17 ctg=NT_039657 str=(-) start=9606486 end=9607493 len=1008 tss=501,508 comm=NADH dehydrogenase (ubiquinone) flavoprotein 2; (AK078351/508/gold;AK013511/501/gold;) | 1008 bp |
| 3   | P964862       | sym=Ndufv2 loc=Loc81728 taxid=10116 spec=Rattus norvegicus chr=9 ctg=NW_047818 str=(-) start=8001731 end=8002731 len=1001 tss=501 comm=24-kDa subunit of mitochondrial NADH dehydrogenase; (XM_343638/508/silver;)            | 1001 bp |

### Alignment (DiAlign format):

Please note that only **upper-case** letters are considered to be **aligned**. For more information, please have a look at the user guide.

[V\\$STAF](#) [V\\$NRF1](#) [V\\$NRF2](#) [V\\$ZF5F](#) [V\\$P53F](#) [V\\$GREF](#) [V\\$HNF4](#) [V\\$EGRE](#)

```

alignment position 1 . . . . . 1 1 . . . . . 2 1 . . . . . 3 1 . . . . . 4 1 . . . . .
P964855           1 - - - - -
P964858           1 - - - - - AT C A T T T C T A C C T C C A C T C A C T G G C A T C C G
P964862           1 c g c g t a g c a t c g a c a g t c A T C A T T T C T A C C T C C A C T T C C T G G C A T T C G
    
```











|                             | (1008 bp)     | (1001 bp)                   |
|-----------------------------|---------------|-----------------------------|
| <b>P964855</b><br>(1001 bp) | 0.194<br>40 % | 0.166<br>34 %               |
| <b>P964858</b><br>(1008 bp) |               | <u>1.000</u><br><u>79 %</u> |

Please note that the **similarity value 1.000** marks only the two **most similar** sequences, it does not necessarily mean that these sequences are identical.

| Extract alignment region      |                                                     |
|-------------------------------|-----------------------------------------------------|
| <b>Positions in alignment</b> | from: <input type="text"/> to: <input type="text"/> |
| <b>Output file</b>            | <input type="text" value="dialign.seq"/>            |

**Extract aligned sequences**

For [comments](#), questions or bug reports, please contact [support@genomatix.de](mailto:support@genomatix.de)

© Genomatix Software GmbH 1998-2005  
- All rights reserved.

[License Agreement](#)

GEMS Launcher 4.1.1

[Genomatix-Logo](#)     
 [Logout](#)     
 [Personal](#)     
 [Messages](#)     
 [GEMS-Logo](#)

[Genomatix Main](#)
[GEMSEI](#)
[Dorado](#)
[Gene2Promoter](#)
[BiblioSphere](#)  
[Frequently asked questions](#)
[Your Results](#)
[Your Sequences](#)
[Your Protocol](#)
[Help](#)

**GEMS Launcher Task: *DiAlign TF*: Multiple alignment plus TF sites working on C1-NDUFV3.seq (3 seq.)**

[\[Alignment\]](#)  
 [\[Pairwise similarities\]](#)

DiAlign professional TF Release 3.1 December 2004

Wed Jun 8 05:00:37 2005

### Solution parameters:

**Sequence file:** [C1-NDUFV3.seq](#) (3 seq.)  
**Type of sequences:** nucleotide sequences  
**Threshold T:** 0.00  
**'\*' signs below alignment denote:** diagonal similarity (max. similarity is represented by 10 '\*' signs) complete alignment is shown  
**Alignment output:** # nucleic acids per line: 50  
**TF output:** common TF matches located in aligned regions (common to 3 (100.0 %) sequences)  
**Family matches:** yes  
**MatInspector library:** Matrix Family Library Version 5.0 (February 2005)  
**Selected groups**

- ALL user\_defined.lib (0.75/Optimized)
- ALL vertebrates.lib (0.75/Optimized)

 (core/matrix sim):

### Aligned Sequences:

| No. | Sequence Name | Sequence Description                                                                                      | Length  |
|-----|---------------|-----------------------------------------------------------------------------------------------------------|---------|
| 1   | hNDUFV3       | hNDUFV3 sym=NDUFV3 loc=Loc4731 taxid=9606 spec=Homo sapiens chr=21 ctg=NT_030188 tss=761                  | 1547 bp |
| 2   | mNDUFV3       | mNDUFV3 sym=1500032D16Rik loc=Loc78330 taxid=10090 spec=Mus musculus chr=17 ctg=NT_039649 str=(+) tss=455 | 1471 bp |
| 3   | rNDUFV3       | rNDUFV3 sym=Mipp65 loc=Loc64539 taxid=10116 spec=Rattus norvegicus chr=20 ctg=NW_047598 str=(+) tss=420   | 966 bp  |

### Alignment (DiAlign format):

Please note that only **upper-case** letters are considered to be **aligned**. For more information, please have a look at the user guide.

[V\\$PCAT](#) [V\\$ZBPF](#) [V\\$ZF5F](#)

```

alignment position 1 . . . . . 11 . . . . . 21 . . . . . 31 . . . . . 41 . . . . .
hNDUFV3          1 g g a a t c c c t a c a c a a t c c a t t t a a a t g a c t g t g g c a g g g c c t c t t c c c c t
mNDUFV3          1 t t t g a a c t a g c - - - - - - - - - - - - - - - - - - - - - - - - - - - - - - - - - - - -
rNDUFV3          1 c t c a t t - - - - - - - - - - - - - - - - - - - - - - - - - - - - - - - - - - - -

alignment position 51 . . . . . 61 . . . . . 71 . . . . . 81 . . . . . 91 . . . . .
hNDUFV3          51 g t g g a a g c t g a a g g t g g c a c g t c c a t c t c c g a t g a a a t g c g a a t g g g g c t
mNDUFV3          12 - - - - - - - - - - - - - - - - - - - - - - - - - - - - - - - - - - - -
rNDUFV3          7 - - - - - - - - - - - - - - - - - - - - - - - - - - - - - - - - - - - -
    
```

```

alignment position 1 0 1 . . . . . 1 1 1 . . . . . 1 2 1 . . . . . 1 3 1 . . . . . 1 4 1 . . . . .
hNDFV3      101 c t g g g c a c g c g g c g g a a g g c a g a g a g a g g c a g a g A A A G A A G C T A A T A A C
mNDFV3      12  - - - - - - - - - - - - - - - - - - - - - - - - - - - - - - - - - - - - - - - - - - - - - - - - - -
rNDFV3      7  - - - - - - - - - - - - - - - - - - - - - - - - - - - - - - - - - - - - - - - - - - - - - - - - - -
          * * * * * * * * * * * * * * * * * * * * * * * * * * * * * * * * * * * * * * * * * * * * * * * * * * *

alignment position 1 5 1 . . . . . 1 6 1 . . . . . 1 7 1 . . . . . 1 8 1 . . . . . 1 9 1 . . . . .
hNDFV3      151 T A A T T A C A C C g a c t c c a c a a t t a c g a c t a a c g t t g g g g a c g a a c t c t t t g
mNDFV3      12  - - - - - - - - - - - - - - - - - - - - - - - - - - - - - - - - - - - - - - - - - - - - - - - - - -
rNDFV3      22 T G A T T A A T C C t t a c a - - - - - - - - - - - - - - - - - - - - - - - - - - - - - - - - - - - - -
          * * * * * * * * * *

alignment position 2 0 1 . . . . . 2 1 1 . . . . . 2 2 1 . . . . . 2 3 1 . . . . . 2 4 1 . . . . .
hNDFV3      201 c t a a a t a a a c a t t t a g g t g a a a c a a a g c t t c c a t t t c c a a t c g g c c t a a c
mNDFV3      12  - - - - - - - - - - - - - - - - - - - - - - - - - - - - - - - - - - - - - - - - - - - - - - - - - -
rNDFV3      37  - - - - - - - - - - - - - - - - - - - - - - - - - - - - - - - - - - - - - - - - - - - - - - - - - -

alignment position 2 5 1 . . . . . 2 6 1 . . . . . 2 7 1 . . . . . 2 8 1 . . . . . 2 9 1 . . . . .
hNDFV3      251 t c t g g t a t t a g c g t t g g c a g g g g c c a t g c a g g a g g g g c a g t g a g c a g t g g
mNDFV3      12  - - - - - - - - - - - - - - - - - - - - - - - - - - - - - - - - - - - - - - - - - - - - - - - - - -
rNDFV3      37  - - - - - - - - - - - - - - - - - - - - - - - - - - - - - - - - - - - - - - - - - - - - - - - - - -

alignment position 3 0 1 . . . . . 3 1 1 . . . . . 3 2 1 . . . . . 3 3 1 . . . . . 3 4 1 . . . . .
hNDFV3      301 t g g c c g c G T T G C C G A C A G A G G G T G A G G G A G C T G G G C G C G T g g t g t g g g c g
mNDFV3      12  - - - - - - - - - - - C C T A C T G C T G G T A T G G T A G G T G G G C A C C T C C A t g C C C A G
rNDFV3      37  - - - - - - - - - - G T T G C C T A G T G C T G G T A A G G T A G G T G G G C A C C A C C A c t C C C A G
          * * * * * * * * * * * * * * * * * * * * * * * * * * * * * * * * * * * * * * * * * * * * * * * * * * *
          * * * * * * * * * * * * * * * * * * * * * * * * * * * * * * * * * * * * * * * * * * * * * * * * * * *
          * * * * * * * * * * * * * * * * * * * * * * * * * * * * * * * * * * * * * * * * * * * * * * * * * * *
          * * * * * * * * * * * * * * * * * * * * * * * * * * * * * * * * * * * * * * * * * * * * * * * * * * *

alignment position 3 5 1 . . . . . 3 6 1 . . . . . 3 7 1 . . . . . 3 8 1 . . . . . 3 9 1 . . . . .
hNDFV3      351 c c g a g g t c c c g a g c t g a a g a g c t t t - - - - - - - - - - - - - - - - - - - - - - - - - - - - - - -
mNDFV3      51 C T T C T G G T T T G T T T G T T C A A G A C C A C G C C C C T A c t g G G C A A G C G C A C T A C
rNDFV3      80 C T T C C G G T T T G T T T G T G C A A G G C C A C G C C C C T A t t a G G C A A A C G C C C T A C
          * * * * * * * * * * * * * * * * * * * * * * * * * * * * * * * * * * * * * * * * * * * * * * * * * * *
          * * * * * * * * * * * * * * * * * * * * * * * * * * * * * * * * * * * * * * * * * * * * * * * * * * *
          * * * * * * * * * * * * * * * * * * * * * * * * * * * * * * * * * * * * * * * * * * * * * * * * * * *
          * * * * * * * * * * * * * * * * * * * * * * * * * * * * * * * * * * * * * * * * * * * * * * * * * * *

alignment position 4 0 1 . . . . . 4 1 1 . . . . . 4 2 1 . . . . . 4 3 1 . . . . . 4 4 1 . . . . .
hNDFV3      376 - - - - - - - - - - - - - - - - - - - - - - - - - - - - - - - - - - - - - - - - - - - - - - - - - -
mNDFV3      101 C A C C G A G T T G T A T C T C C A A G A A A C A A C A A A C T C A C A A A G A T C T C A C C A A A
rNDFV3      130 C A C C T A G T T G T A T C T C C A A G A A A C A A C A A A C T C A C A A A A A T C T C A C C A A A
          * * * * * * * * * * * * * * * * * * * * * * * * * * * * * * * * * * * * * * * * * * * * * * * * * * *
          * * * * * * * * * * * * * * * * * * * * * * * * * * * * * * * * * * * * * * * * * * * * * * * * * * *
          * * * * * * * * * * * * * * * * * * * * * * * * * * * * * * * * * * * * * * * * * * * * * * * * * * *
          * * * * * * * * * * * * * * * * * * * * * * * * * * * * * * * * * * * * * * * * * * * * * * * * * * *
          * * * * * * * * * * * * * * * * * * * * * * * * * * * * * * * * * * * * * * * * * * * * * * * * * * *
          * * * * * * * * * * * * * * * * * * * * * * * * * * * * * * * * * * * * * * * * * * * * * * * * * * *
          * * * * * * * * * * * * * * * * * * * * * * * * * * * * * * * * * * * * * * * * * * * * * * * * * * *

alignment position 4 5 1 . . . . . 4 6 1 . . . . . 4 7 1 . . . . . 4 8 1 . . . . . 4 9 1 . . . . .
hNDFV3      390 C A C A G A A C T A T C a T C A A G T A G G A C C A G A c t g t g c c c c c a g g g a a g g t c g
mNDFV3      151 C A C A G A A G T C T C - - T C A A G T C G A A C C A G A A A C G C A A A G G A C A T G A T T C T A
rNDFV3      180 C A C A G A A G a C T C - - T C A A G A C G A A C C A G A A A C G C A A A G G A C A C G A T C C T A
          * * * * * * * * * * * * * * * * * * * * * * * * * * * * * * * * * * * * * * * * * * * * * * * * * * *
          * * * * * * * * * * * * * * * * * * * * * * * * * * * * * * * * * * * * * * * * * * * * * * * * * * *
          * * * * * * * * * * * * * * * * * * * * * * * * * * * * * * * * * * * * * * * * * * * * * * * * * * *
          * * * * * * * * * * * * * * * * * * * * * * * * * * * * * * * * * * * * * * * * * * * * * * * * * * *
          * * * * * * * * * * * * * * * * * * * * * * * * * * * * * * * * * * * * * * * * * * * * * * * * * * *
          * * * * * * * * * * * * * * * * * * * * * * * * * * * * * * * * * * * * * * * * * * * * * * * * * * *
          * * * * * * * * * * * * * * * * * * * * * * * * * * * * * * * * * * * * * * * * * * * * * * * * * * *
          * * * * * * * * * * * * * * * * * * * * * * * * * * * * * * * * * * * * * * * * * * * * * * * * * * *

alignment position 5 0 1 . . . . . 5 1 1 . . . . . 5 2 1 . . . . . 5 3 1 . . . . . 5 4 1 . . . . .

```







|                    |      |                     |                     |                     |                     |                     |
|--------------------|------|---------------------|---------------------|---------------------|---------------------|---------------------|
| <b>hNDUFV3</b>     | 1405 | GGC AAAT AAA        | AAGCTAAGGC          | CAa g g c c g g g   | c g c g g a c a c t | t t g g g a t t t t |
| <b>mNDUFV3</b>     | 854  | GCA ATAT AAA        | ATACAg g T GA       | CAGAG GG C T C      | CC GT CG T CAA      | AT GGC ACT g        |
| <b>rNDUFV3</b>     | 882  | GCA AAAT AAA        | ATACAGAT GA         | CAGAG GG C C G      | CC AT CG T CAG      | AT GAAC ACT a       |
|                    |      | *****               | *****               | *****               | *****               | *****               |
|                    |      | *****               | *****               | *****               | *****               | *****               |
|                    |      | *****               | *****               | *****               | *****               | *****               |
|                    |      | *****               | *****               | *****               | *****               | *****               |
| alignment position |      | 1 6 5 1 . . . . .   | 1 6 6 1 . . . . .   | 1 6 7 1 . . . . .   | 1 6 8 1 . . . . .   | 1 6 9 1 . . . . .   |
| <b>hNDUFV3</b>     | 1455 | g c c t g t - - -   | - - - - -           | - - - - -           | - - - - -           | - - - - -           |
| <b>mNDUFV3</b>     | 904  | t t t a a TT ATT    | CCTTCAGGTA          | TAt t g CTC CC      | AG CG AT T T T T    | T t c c a g c g t g |
| <b>rNDUFV3</b>     | 932  | g - - - TT ACT      | CCTTCAGGTA          | TAa - - CTT CC      | AG CG AT T T T T    | T - - - - -         |
|                    |      | *****               | *****               | *****               | *****               | *****               |
| alignment position |      | 1 7 0 1 . . . . .   | 1 7 1 1 . . . . .   | 1 7 2 1 . . . . .   | 1 7 3 1 . . . . .   | 1 7 4 1 . . . . .   |
| <b>hNDUFV3</b>     | 1461 | - - - - -           | - - - - -           | - - - - -           | - - - - -           | - - - - -           |
| <b>mNDUFV3</b>     | 954  | t a t c g g t a c a | c a t a a t t t g t | a c a c a c a c g g | a g a a t c a t c a | g t a t a a a t a g |
| <b>rNDUFV3</b>     | 967  | - - - - -           | - - - - -           | - - - - -           | - - - - -           | - - - - -           |
| alignment position |      | 1 7 5 1 . . . . .   | 1 7 6 1 . . . . .   | 1 7 7 1 . . . . .   | 1 7 8 1 . . . . .   | 1 7 9 1 . . . . .   |
| <b>hNDUFV3</b>     | 1461 | - - - - -           | - - - - -           | - - - - -           | - - - - -           | - - - - -           |
| <b>mNDUFV3</b>     | 1004 | a a g t t t t c c g | g t t c t t t t g c | t c c a c c c c c c | a a c c c c c t c c | c t a g c a t g a a |
| <b>rNDUFV3</b>     | 967  | - - - - -           | - - - - -           | - - - - -           | - - - - -           | - - - - -           |
| alignment position |      | 1 8 0 1 . . . . .   | 1 8 1 1 . . . . .   | 1 8 2 1 . . . . .   | 1 8 3 1 . . . . .   | 1 8 4 1 . . . . .   |
| <b>hNDUFV3</b>     | 1461 | - - - - -           | - - - - -           | - - - - -           | - - - - -           | - - - - -           |
| <b>mNDUFV3</b>     | 1054 | g c a t c c t a g g | a t c t a a c a c a | t a c c t t a g c g | g t t g c c g g c t | g a a t t a c a a t |
| <b>rNDUFV3</b>     | 967  | - - - - -           | - - - - -           | - - - - -           | - - - - -           | - - - - -           |
| alignment position |      | 1 8 5 1 . . . . .   | 1 8 6 1 . . . . .   | 1 8 7 1 . . . . .   | 1 8 8 1 . . . . .   | 1 8 9 1 . . . . .   |
| <b>hNDUFV3</b>     | 1461 | - - - - -           | - - - - -           | - - - - -           | - - - - -           | - - - - -           |
| <b>mNDUFV3</b>     | 1104 | a a g a t t c t t c | t c a a a t t g t a | a c a c t t c t g a | a g c a a t t a t c | t a c a t c c t a t |
| <b>rNDUFV3</b>     | 967  | - - - - -           | - - - - -           | - - - - -           | - - - - -           | - - - - -           |
| alignment position |      | 1 9 0 1 . . . . .   | 1 9 1 1 . . . . .   | 1 9 2 1 . . . . .   | 1 9 3 1 . . . . .   | 1 9 4 1 . . . . .   |
| <b>hNDUFV3</b>     | 1461 | - - - - -           | - - - - -           | - - - - -           | - - - - -           | - - - - -           |
| <b>mNDUFV3</b>     | 1154 | t t a c t a g t a g | a t a g t g t t t c | t g c a a c t t t a | c t a a c t g t a g | g g a g a t a a t t |
| <b>rNDUFV3</b>     | 967  | - - - - -           | - - - - -           | - - - - -           | - - - - -           | - - - - -           |
| alignment position |      | 1 9 5 1 . . . . .   | 1 9 6 1 . . . . .   | 1 9 7 1 . . . . .   | 1 9 8 1 . . . . .   | 1 9 9 1 . . . . .   |
| <b>hNDUFV3</b>     | 1461 | - - - - -           | AAT CCCAGTA         | CTTTG GAA AG        | c c g a g c c a g g | c g g a t c g c t t |
| <b>mNDUFV3</b>     | 1204 | t t g c a a a a a g | AAACATAGTA          | TTTTGTAA AG         | t a a c a a a a t a | g c c a g t - - -   |
| <b>rNDUFV3</b>     | 967  | - - - - -           | - - - - -           | - - - - -           | - - - - -           | - - - - -           |
|                    |      |                     | *****               | *****               | *****               | *****               |
| alignment position |      | 2 0 0 1 . . . . .   | 2 0 1 1 . . . . .   | 2 0 2 1 . . . . .   | 2 0 3 1 . . . . .   | 2 0 4 1 . . . . .   |
| <b>hNDUFV3</b>     | 1501 | g a g t t c a g g a | g t t c g AGACT     | AGCCT GGC CA        | AC AT GT CGAA       | AC CCCg t - -       |
| <b>mNDUFV3</b>     | 1250 | - - - - -           | - - - - AGAGT       | AAACT GGC TG        | CC CT GT ATTA       | AG ACCc a g g a     |
| <b>rNDUFV3</b>     | 967  | - - - - -           | - - - - -           | - - - - -           | - - - - -           | - - - - -           |
|                    |      |                     | *****               | *****               | *****               | *****               |
| alignment position |      | 2 0 5 1 . . . . .   | 2 0 6 1 . . . . .   | 2 0 7 1 . . . . .   | 2 0 8 1 . . . . .   | 2 0 9 1 . . . . .   |
| <b>hNDUFV3</b>     | 1548 | - - - - -           | - - - - -           | - - - - -           | - - - - -           | - - - - -           |
| <b>mNDUFV3</b>     | 1285 | g t c t t g g g c t | g a g a g c c a a c | t g g g c c t t g c | a t c c a g g a t c | c a g g c c t g a g |
| <b>rNDUFV3</b>     | 967  | - - - - -           | - - - - -           | - - - - -           | - - - - -           | - - - - -           |
| alignment position |      | 2 1 0 1 . . . . .   | 2 1 1 1 . . . . .   | 2 1 2 1 . . . . .   | 2 1 3 1 . . . . .   | 2 1 4 1 . . . . .   |
| <b>hNDUFV3</b>     | 1548 | - - - - -           | - - - - -           | - - - - -           | - - - - -           | - - - - -           |
| <b>mNDUFV3</b>     | 1335 | t g t t a c a g c c | g g c a t g a t g g | c t g c c a t c c a | g a g g c c a g c a | c t t c c c t c c c |
| <b>rNDUFV3</b>     | 967  | - - - - -           | - - - - -           | - - - - -           | - - - - -           | - - - - -           |



```

alignment position 2 1 5 1 . . . . . 2 1 6 1 . . . . . 2 1 7 1 . . . . . 2 1 8 1 . . . . . 2 1 9 1 . . . . .
hNDUFV3      1548 - - - - -
mNDUFV3      1385 c c c t c c c c c a t g c t a a c a c a g g c t c c c c c c t c c c c c c a a c a c a g g t c t g
rNDUFV3      967 - - - - -

alignment position 2 2 0 1 . . . . . 2 2 1 1 . . . . . 2 2 2 1 . . . . . 2 2 3 1 . . . . .
hNDUFV3      1548 - - - - -
mNDUFV3      1435 t c t a a c t g a g g c t t t g c a g g a c a c g t g a c a g c a a g a g
rNDUFV3      967 - - - - -
    
```

### Pairwise similarities:

For each pairwise alignment, the **similarity** (relative to the maximum similarity) and the **number of identical nucleic acids** (in % of shorter sequence) is given. Maximum values are underlined.

|                      | mNDUFV3<br>(1471 bp) | rNDUFV3<br>(966 bp)         |
|----------------------|----------------------|-----------------------------|
| hNDUFV3<br>(1547 bp) | 0.063<br>14 %        | 0.074<br>24 %               |
| mNDUFV3<br>(1471 bp) |                      | <u>1.000</u><br><u>80 %</u> |

Please note that the **similarity value 1.000** marks only the two **most similar** sequences, it does not necessarily mean that these sequences are identical.

| Extract alignment region  |                                                     |
|---------------------------|-----------------------------------------------------|
| Positions in alignment    | from: <input type="text"/> to: <input type="text"/> |
| Output file               | <input type="text" value="dialign.seq"/>            |
| Extract aligned sequences |                                                     |

For [comments](#), questions or bug reports, please contact [support@genomatix.de](mailto:support@genomatix.de)
