# Supplementary material for: Transcriptional co-expression and co-regulation of genes coding for components of the oxidative phosphorylation system
Source: Springer Nature journal article supplement (doi:10.1186/1471-2164-9-18), 2008-01-01
Supplement: 12864_2007_1212_MOESM5_ESM.pdf [file 12864_2007_1212_MOESM5_ESM.pdf]

This Supplementary Material shows the Core Promoters of Complex II subunits/related genes identified by phylogenetic footprinting. The conserved regions are shown in color codes, which correspond to specific Transcription Factor Binding Sites (TFBS).

The description of the complete description of TFBS can be found in Supplementary Table S1 (in the “Matrix Family Library” Excel sheet).

**GEMS Launcher Task: *DiAlign TF*: Multiple alignment plus TF sites working on promoters.seq (3 seq.)**

[[Alignment](#)] [[Pairwise similarities](#)]

DiAlign professional TF Release 3.1 December 2004

Wed Jun 8 21:31:13 2005

### Solution parameters:

**Sequence file:** [promoters.seq](#) (3 seq.)  
**Type of sequences:** nucleotide sequences  
**Threshold T:** 0.00  
**\*' signs below alignment denote:** diagonal similarity (max. similarity is represented by 10 '\*' signs)  
**Alignment output:** complete alignment is shown  
# nucleic acids per line: 50  
**TF output:** common TF matches located in aligned regions (common to 3 (100.0 %) sequences)  
**Family matches:** yes  
**MatInspector library:** Matrix Family Library Version 5.0 (February 2005)  

- ALL user\_defined.lib (0.75/Optimized)
- ALL vertebrates.lib (0.75/Optimized)

**Selected groups**  
(core/matrix sim):

### Aligned Sequences:

| No. | Sequence Name | Sequence Description                                                                                                                                                                                                                                                                                                                          | Length     |
|-----|---------------|-----------------------------------------------------------------------------------------------------------------------------------------------------------------------------------------------------------------------------------------------------------------------------------------------------------------------------------------------|------------|
| 1   | P878032       | sym=SDHA loc=Loc6389 taxid=9606 spec=Homo sapiens chr=5 <br>ctg=NT_006576 str=(+) start=207947 end=208947 len=1001  tss=501  comm=succinate<br>dehydrogenase complex, subunit A, flavoprotein (Fp); (NM_004168/501/silver;)                                                                                                                   | 1001<br>bp |
| 2   | P878035       | sym=Sdha loc=Loc66945 taxid=10090 spec=Mus musculus chr=13 <br>ctg=NT_078713 str=(-) start=5811894 end=5812912 len=1019  tss=501,502,514,519 <br>comm=succinate dehydrogenase complex, subunit A, flavoprotein (Fp);<br>(AK029520/510/gold;AK010561/522/gold;AK050475/522/gold;<br>AK049590/522/gold;AK075990/527/gold;XM_127445/509/bronze;) | 1019<br>bp |
| 3   | P878037       | sym=Sdha loc=Loc157074 taxid=10116 spec=Rattus norvegicus <br>chr=1 ctg=NW_047549 str=(+) start=6979031 end=6980031  len=1001 tss=501  comm=succinate<br>dehydrogenase complex, subunit A, flavoprotein (Fp); (NM_130428/501/bronze;)                                                                                                         | 1001<br>bp |

### Alignment (DiAlign format):

Please note that only **upper-case** letters are considered to be **aligned**. For more information, please have a look at the user guide.

**V\$GLF** **V\$NRF1** **USNRF1** **V\$EGRF** **V\$P53F** **V\$INSM** **V\$EREF** **USEREF** **V\$RORA**

```

alignment position 1 . . . . . 11 . . . . . 21 . . . . . 31 . . . . . 41 . . . . .
P878032      1 c a c t t t a a g t t t g t t t a c a t g t g a c c t c c - - - - - A C A A A C A
P878035      1 - - - - - C C T C C A G C T T C C C A G C T G C T G - T A A C G A A G A
P878037      1 a g g a t g a c a a c a g g c c g g t C C C C A G C T T T C C A G C A G C T G t T A A C G A A G A
    
```









```

*****
*****

```

```

alignment position 1301 . . . .
P878032    1002 - - - - -
P878035    1012 c t c a g g g t
P878037    1002 - - - - -

```

## Pairwise similarities:

For each pairwise alignment, the [similarity](#) (relative to the maximum similarity) and the [number of identical nucleic acids](#) (in % of shorter sequence) is given. Maximum values are underlined.

|                             | <b>P878035</b><br>(1019 bp) | <b>P878037</b><br>(1001 bp) |
|-----------------------------|-----------------------------|-----------------------------|
| <b>P878032</b><br>(1001 bp) | <u>0.086</u><br>29 %        | <u>0.075</u><br>28 %        |
| <b>P878035</b><br>(1019 bp) |                             | <u>1.000</u><br><u>83 %</u> |

Please note that the **similarity value 1.000** marks only the two **most similar** sequences, it does not necessarily mean that these sequences are identical.

| Extract alignment region         |                                                     |
|----------------------------------|-----------------------------------------------------|
| <b>Positions in alignment</b>    | from: <input type="text"/> to: <input type="text"/> |
| <b>Output file</b>               | <input type="text" value="dialign.seq"/>            |
| <b>Extract aligned sequences</b> |                                                     |

For [comments](#), questions or bug reports, please contact [support@genomatix.de](mailto:support@genomatix.de)

© Genomatix Software GmbH 1998-2005  
- All rights reserved.

[License Agreement](#)

GEMS Launcher 4.1.1





|                    |                         |                     |                             |                     |                     |
|--------------------|-------------------------|---------------------|-----------------------------|---------------------|---------------------|
| alignment position | 51 . . . . .            | 61 . . . . .        | 71 . . . . .                | 81 . . . . .        | 91 . . . . .        |
| <b>P876195</b>     | 51 g t t c a a g a c c  | a g t c t g g c c a | a g a t g a t g a a         | a c c c c g t c t c | t a c t a a a a t   |
| <b>P876196</b>     | 51 t t t g t g t g t t  | t - - - - -         | - - - - -                   | - - - - -           | - - - - -           |
| <b>P876197</b>     | 3 - - - - -             | - - - - -           | - - - - -                   | - - - - -           | - - - - -           |
|                    |                         |                     |                             |                     |                     |
| alignment position | 101 . . . . .           | 111 . . . . .       | 121 . . . . .               | 131 . . . . .       | 141 . . . . .       |
| <b>P876195</b>     | 101 a c a a a a a a t t | a g c c g g g t g t | g a t g g t g t g c         | g c c t g t a a t c | c c a g c t a c t c |
| <b>P876196</b>     | 62 - - - - -            | - - - - -           | - - - - -                   | - - - - -           | - - - - -           |
| <b>P876197</b>     | 3 - - - - -             | - - - - -           | - - - - -                   | - - - - -           | - - - - -           |
|                    |                         |                     |                             |                     |                     |
| alignment position | 151 . . . . .           | 161 . . . . .       | 171 . . . . .               | 181 . . . . .       | 191 . . . . .       |
| <b>P876195</b>     | 151 g g g a g g c T G A | G G C A G G a g a a | t c g c g t g a a c         | c c g g g a g g c g | g a g g t t g c a g |
| <b>P876196</b>     | 62 - - - - - T G A      | G G C A G G g t C T | C A A G T A T C C C         | A G A T - - - - -   | - - - - -           |
| <b>P876197</b>     | 3 - - - - -             | - - - - - C T       | C A A G T A T C C C         | A G A T - - - - -   | - - - - -           |
|                    |                         | ***                 | *****                       | *****               | *****               |
|                    |                         |                     | **                          | *****               | *****               |
|                    |                         |                     | **                          | *****               | *****               |
|                    |                         |                     |                             |                     |                     |
| alignment position | 201 . . . . .           | 211 . . . . .       | 221 . . . . .               | 231 . . . . .       | 241 . . . . .       |
| <b>P876195</b>     | 201 t g a g c c a a g a | t c g c g c c a t t | g c a c t c c a g c         | c c g g g a a a c a | g t g c g A G A C T |
| <b>P876196</b>     | 89 - - - - -            | - - - - -           | - - - - -                   | - - - - -           | - - - - - G G A C T |
| <b>P876197</b>     | 19 - - - - -            | - - - - -           | - - - - -                   | - - - - -           | - - - - - A G C C T |
|                    |                         |                     |                             |                     | *****               |
|                    |                         |                     |                             |                     | *****               |
|                    |                         |                     |                             |                     | *****               |
|                    |                         |                     |                             |                     |                     |
| alignment position | 251 . . . . .           | 261 . . . . .       | 271 . . . . .               | 281 . . . . .       | 291 . . . . .       |
| <b>P876195</b>     | 251 C C A T C T C A a a | c a a a c a a a c a | a a a - - - - -             | - - - - -           | - - - - -           |
| <b>P876196</b>     | 94 C G A C C T C A T T  | A A G T A G C g g A | G G G T G A G C T T         | G G T T C T C C T A | C T G T C T C C A T |
| <b>P876197</b>     | 24 C C A C C T C A C T  | A A G T A G C c a A | G G A T G A G C T T         | G A T T C T C C T A | C T G C C T C C A C |
|                    | *****                   | *****               | *                           | *****               | *****               |
|                    | *****                   | *****               | *                           | *****               | *****               |
|                    | *****                   | *****               |                             | *****               | *****               |
|                    |                         |                     |                             |                     |                     |
| alignment position | 301 . . . . .           | 311 . . . . .       | 321 . . . . .               | 331 . . . . .       | 341 . . . . .       |
| <b>P876195</b>     | 274 - - - - -           | - - - - - A T T C C | A G G A A T - - - - -       | - - - - -           | - - - - -           |
| <b>P876196</b>     | 144 A T G C C g - - - - | - - - - -           | - - - - - G G C A T G C A A | C T T C T G T A C c | g a c g - - - - -   |
| <b>P876197</b>     | 74 A T G C C a a t t t  | c t g g g A T T C C | A G G C A T G C A A         | C T T A C G T A C a | t a t t t a t g a a |
|                    | *****                   | *****               | *****                       | *****               |                     |
|                    | *****                   |                     |                             |                     |                     |
|                    |                         |                     |                             |                     |                     |
| alignment position | 351 . . . . .           | 361 . . . . .       | 371 . . . . .               | 381 . . . . .       | 391 . . . . .       |
| <b>P876195</b>     | 285 - - - - -           | - - - - -           | - - - - -                   | - - - - -           | - - - - -           |
| <b>P876196</b>     | 173 - - - - -           | - - - - -           | - - - - - T G A C G T T C A | T C T T T t g a t c | a c t t c a g t c a |
| <b>P876197</b>     | 124 t a a a t g a a t g | a g c g a c a c c t | t T G A C A T T C A         | T T T T T g t g a c | c g c c t c a a t c |
|                    |                         |                     | *****                       | *****               |                     |
|                    |                         |                     |                             |                     |                     |
| alignment position | 401 . . . . .           | 411 . . . . .       | 421 . . . . .               | 431 . . . . .       | 441 . . . . .       |
| <b>P876195</b>     | 285 - - - - -           | - - - - -           | - - - - -                   | - - - - -           | - - - - -           |
| <b>P876196</b>     | 202 c t t a a - C A A G | T G T C C C A A T C | A G G T A G G G A C         | T G A C A G G T T C | T C T A G a t t t a |
| <b>P876197</b>     | 174 g c t c g c C A A C | T G T C T C G C T C | A G A G A G G G A C         | T G A C G G G T C C | T C T A G - - - - - |
|                    | *****                   | *****               | *****                       | *****               | *****               |
|                    | *****                   | *****               | *****                       | *****               | *****               |
|                    |                         |                     |                             |                     |                     |
| alignment position | 451 . . . . .           | 461 . . . . .       | 471 . . . . .               | 481 . . . . .       | 491 . . . . .       |

|                    |     |                     |                     |                     |                     |                         |           |           |           |
|--------------------|-----|---------------------|---------------------|---------------------|---------------------|-------------------------|-----------|-----------|-----------|
| <b>P876195</b>     | 285 | - - - - -           | - - - - -           | - - - - -           | - - - - -           | - - - - -               | - - - - - | - - - - - | - - - - - |
| <b>P876196</b>     | 251 | g C A C A A A G C T | G A C C A G A C A A | G A G T C A C A G G | T G A T T G A C A G | A C A C C A C T G C     |           |           |           |
| <b>P876197</b>     | 219 | - C A C A A A A C T | G A T C A G A C A A | G A G T C A C A G G | T G A T T G A C A G | A C A C G A C T G C     |           |           |           |
|                    |     | * * * * *           | * * * * *           | * * * * *           | * * * * *           | * * * * *               | * * * * * | * * * * * | * * * * * |
|                    |     |                     |                     | * * * * *           | * * * * *           | * * * * *               | * * * * * | * * * * * | * * * * * |
|                    |     |                     |                     | * * * * *           | * * * * *           | * * * * *               | * * * * * | * * * * * | * * * * * |
|                    |     |                     |                     | * * * * *           | * * * * *           | * * * * *               | * * * * * | * * * * * | * * * * * |
| alignment position |     | 5 0 1 . . . . .     | 5 1 1 . . . . .     | 5 2 1 . . . . .     | 5 3 1 . . . . .     | 5 4 1 . . . . .         |           |           |           |
| <b>P876195</b>     | 285 | - - - - - A A A-    | G A G G T T G A A A | T C G G G G C A G G | G A C C C G G A T A | G G A T G G C T C C     |           |           |           |
| <b>P876196</b>     | 301 | A A G T A G A G A a | G G G T T A A A A A | T C A C A G C C A C | C A G C A G A A T A | G G A A A G C C C C     |           |           |           |
| <b>P876197</b>     | 268 | A A G T A G A G A-  | G G G A T T A A A A | T C A C A G C C T T | C A G C A A A C T A | G G A A A G A C C C     |           |           |           |
|                    |     | * * * * *           | * * * * *           | * * * * *           | * * * * *           | * * * * *               | * * * * * | * * * * * | * * * * * |
|                    |     | * * * * *           | * * * * *           | * * * * *           | * * * * *           | * * * * *               | * * * * * | * * * * * | * * * * * |
|                    |     | * * * * *           | * * * * *           | * * * * *           | * * * * *           | * * * * *               | * * * * * | * * * * * | * * * * * |
|                    |     | * * * * *           | * * * * *           | * * * * *           | * * * * *           | * * * * *               | * * * * * | * * * * * | * * * * * |
| alignment position |     | 5 5 1 . . . . .     | 5 6 1 . . . . .     | 5 7 1 . . . . .     | 5 8 1 . . . . .     | 5 9 1 . . . . .         |           |           |           |
| <b>P876195</b>     | 328 | G- C C C c a t c t  | a a G T C T T A G C | C C C A C C C C e t | g a a a g t c g c   | - - - - - C             |           |           |           |
| <b>P876196</b>     | 351 | G- C C C T C C T G  | - - G C C T C T G C | C C C G C C C C T C | C A C G C T A C C C | T T C C- C T C T C      |           |           |           |
| <b>P876197</b>     | 317 | g c C C C T C C T G | - - G C C T T T G C | C C C A C C C C T C | C A G G C T A C C T | T C C C t C T T T C     |           |           |           |
|                    |     | * * * * *           | * * * * *           | * * * * *           | * * * * *           | * * * * *               | * * * * * | * * * * * | * * * * * |
|                    |     | * * * * *           | * * * * *           | * * * * *           | * * * * *           | * * * * *               | * * * * * | * * * * * | * * * * * |
|                    |     | * * * * *           | * * * * *           | * * * * *           | * * * * *           | * * * * *               | * * * * * | * * * * * | * * * * * |
| alignment position |     | 6 0 1 . . . . .     | 6 1 1 . . . . .     | 6 2 1 . . . . .     | 6 3 1 . . . . .     | 6 4 1 . . . . .         |           |           |           |
| <b>P876195</b>     | 367 | C T G C C T C T C A | G A C T C C t e c c | c t t t c t g a g a | a g g t c a c g g g | G G A A G C C A A A     |           |           |           |
| <b>P876196</b>     | 397 | C C G C C C T C A   | G A C T C C a G A G | G T C A C C T T A G | G A A C A T A- - -  | G G A A G C C C A G     |           |           |           |
| <b>P876197</b>     | 365 | C C G C T G C T C C | G A C T C C A G A G | G T C A C C T T A G | G A A C A T A- - -  | G G A A G C C C A G     |           |           |           |
|                    |     | * * * * *           | * * * * *           | * * * * *           | * * * * *           | * * * * *               | * * * * * | * * * * * | * * * * * |
|                    |     | * * * * *           | * * * * *           | * * * * *           | * * * * *           | * * * * *               | * * * * * | * * * * * | * * * * * |
|                    |     |                     |                     | * * * * *           | * * * * *           | * * * * *               | * * * * * | * * * * * | * * * * * |
|                    |     |                     |                     | * * * * *           | * * * * *           | * * * * *               | * * * * * | * * * * * | * * * * * |
|                    |     |                     |                     | * * * * *           | * * * * *           | * * * * *               | * * * * * | * * * * * | * * * * * |
| alignment position |     | 6 5 1 . . . . .     | 6 6 1 . . . . .     | 6 7 1 . . . . .     | 6 8 1 . . . . .     | 6 9 1 . . . . .         |           |           |           |
| <b>P876195</b>     | 417 | T G G G C A T G C G | C C g C T A C T G C | G C T A T G C G C   | A C G C T C G C T G | T G C T T G C C C c     |           |           |           |
| <b>P876196</b>     | 444 | T G G G C A T G C G | C C - C T A C G G G | C C G C T G C T G C | A C A C A C G C A C | T T C C T G T A C A     |           |           |           |
| <b>P876197</b>     | 412 | T G G G C A T G C G | C C - C T A C T G G | C C G C T A C G G C | A C A C T C G C A C | T T C C T G T C C G     |           |           |           |
|                    |     | * * * * *           | * * * * *           | * * * * *           | * * * * *           | * * * * *               | * * * * * | * * * * * | * * * * * |
|                    |     | * * * * *           | * * * * *           | * * * * *           | * * * * *           | * * * * *               | * * * * * | * * * * * | * * * * * |
|                    |     | * * * * *           | * * * * *           | * * * * *           | * * * * *           | * * * * *               | * * * * * | * * * * * | * * * * * |
|                    |     | * * * * *           | * * * * *           | * * * * *           | * * * * *           | * * * * *               | * * * * * | * * * * * | * * * * * |
|                    |     | * * * * *           | * * * * *           | * * * * *           | * * * * *           | * * * * *               | * * * * * | * * * * * | * * * * * |
| alignment position |     | 7 0 1 . . . . .     | 7 1 1 . . . . .     | 7 2 1 . . . . .     | 7 3 1 . . . . .     | 7 4 1 . . . . .         |           |           |           |
| <b>P876195</b>     | 467 | g c c t t c c c t c | c g e c c A C C C G | G- G A A A C C G G  | A A G C C G C C T C | C C A C T T G G T T     |           |           |           |
| <b>P876196</b>     | 493 | T T G- - - - -      | - - - - - G C T C G | g a G A A A C C G G | A A G C G G C C T T | C C A C T C G T T G     |           |           |           |
| <b>P876197</b>     | 461 | T T T- - - - -      | - - - - - A C T C G | G- G A T A C C G G  | A A G C T G C C T T | C C A C T C G T T G     |           |           |           |
|                    |     | * * *               | * * * * *           | * * * * *           | * * * * *           | * * * * *               | * * * * * | * * * * * | * * * * * |
|                    |     | * * *               | * * * * *           | * * * * *           | * * * * *           | * * * * *               | * * * * * | * * * * * | * * * * * |
|                    |     |                     | * * * * *           | * * * * *           | * * * * *           | * * * * *               | * * * * * | * * * * * | * * * * * |
|                    |     |                     | * * * * *           | * * * * *           | * * * * *           | * * * * *               | * * * * * | * * * * * | * * * * * |
|                    |     |                     | * * * * *           | * * * * *           | * * * * *           | * * * * *               | * * * * * | * * * * * | * * * * * |
| alignment position |     | 7 5 1 . . . . .     | 7 6 1 . . . . .     | 7 7 1 . . . . .     | 7 8 1 . . . . .     | 7 9 1 . . . . .         |           |           |           |
| <b>P876195</b>     | 516 | G C T C G T A C G C | G G c t a g t g G G | T C C T C A g t g g | a t g t a - - -     | G G C T G G G C G C C G |           |           |           |
| <b>P876196</b>     | 531 | G C G C T T A G G C | G G C T A G C- G G  | T C C T C A G G G T | G A G A G G C C G G | C T T C C C A C C G     |           |           |           |
| <b>P876197</b>     | 498 | G C T C T T A G G C | T G C T A G C- G G  | A C C T C A A G G G | G A G A G G C C G G | C T T C C C A C C G     |           |           |           |





of shorter sequence) is given. Maximum values are underlined.

|                             |                             |                             |
|-----------------------------|-----------------------------|-----------------------------|
|                             | <b>P876196</b><br>(1119 bp) | <b>P876197</b><br>(1001 bp) |
| <b>P876195</b><br>(1001 bp) | 0.200<br>34 %               | 0.209<br>38 %               |
| <b>P876196</b><br>(1119 bp) |                             | <u>1.000</u><br><u>79 %</u> |

Please note that the **similarity value 1.000** marks only the two **most similar** sequences, it does not necessarily mean that these sequences are identical.

| Extract alignment region  |                                                     |
|---------------------------|-----------------------------------------------------|
| Positions in alignment    | from: <input type="text"/> to: <input type="text"/> |
| Output file               | <input type="text" value="dialign.seq"/>            |
| Extract aligned sequences |                                                     |

For [comments](#), questions or bug reports, please contact [support@genomatix.de](mailto:support@genomatix.de)

© Genomatix Software GmbH 1998-2005  
- All rights reserved.

[License Agreement](#)

GEMS Launcher 4.1.1













**GEMS Launcher Task: *DiAlign TF*: Multiple alignment plus TF sites working on promoters\_2.seq (3 seq.)**

[\[Alignment\]](#) [\[Pairwise similarities\]](#)

DiAlign professional TF Release 3.1 December 2004

Wed Jun 8 21:46:18 2005

**Solution parameters:**

**Sequence file:** [promoters\\_2.seq](#) (3 seq.)  
**Type of sequences:** nucleotide sequences  
**Threshold T:** 0.00  
**\*' signs below alignment denote:** diagonal similarity (max. similarity is represented by 10 '\*' signs)  
**Alignment output:** complete alignment is shown  
 # nucleic acids per line: 50  
**TF output:** common TF matches located in aligned regions (common to 3 (100.0 %) sequences)  
**Family matches:** yes  
**MatInspector library:** Matrix Family Library Version 5.0 (February 2005)  
**Selected groups**  
 (core/matrix sim):
 

- ALL user\_defined.lib (0.75/Optimized)
- ALL vertebrates.lib (0.75/Optimized)

**Aligned Sequences:**

| No. | Sequence Name | Sequence Description                                                                                                                                                                                                                                                       | Length  |
|-----|---------------|----------------------------------------------------------------------------------------------------------------------------------------------------------------------------------------------------------------------------------------------------------------------------|---------|
| 1   | P876742       | sym=SDHD loc=Loc6392 taxid=9606 spec=Homo sapiens chr=11 ctg=NT_033899 str=(+) start=15519538 end=15520538 len=1001  tss=501  comm=succinate dehydrogenase complex, subunit D, integral membrane protein; (AK075360/520/gold;NM_003002/520/bronze;)                        | 1001 bp |
| 2   | P876743       | sym=Sdhd loc=Loc66925 taxid=10090 spec=Mus musculus chr=9 ctg=NT_039473 str=(-) start=10108845 end=10109850 len=1006  tss=501,506  comm=succinate dehydrogenase complex, subunit D, integral membrane protein; (AK013503/507/gold;AK013962/502/gold;NM_025848/502/bronze;) | 1006 bp |
| 3   | P876744       | sym=Sdhd loc=Loc363061 taxid=10116 spec=Rattus norvegicus chr=8 ctg=NW_047799 str=(-) start=23593559 end=23594559  len=1001 tss=501  comm=succinate dehydrogenase complex, subunit D, integral membrane protein; (XM_343388/519/bronze;)                                   | 1001 bp |

**Alignment (DiAlign format):**

Please note that only **upper-case** letters are considered to be **aligned**. For more information, please have a look at the user guide.

[V\\$AREB](#)
[V\\$EBOX](#)
[V\\$ETSF](#)
[V\\$SNRF2](#)
[V\\$SRORA](#)
[V\\$SEREF](#)
[V\\$SHNF4](#)
[V\\$USEREF](#)
[V\\$SFI1F](#)
[V\\$YYIF](#)
[V\\$FKHD](#)

```

alignment position 1 . . . . . 11 . . . . . 21 . . . . . 31 . . . . . 41 . . . . .
P876742          1 g c - - - - -
P876743          1 c c t g t G C T C C A A G G T C G G A A C C C A G A G A T T C C G A G T G C C A T T c c c g A C C A
P876744          1 - - - - - G C T C C A A G G T C A G A A C C C A G A G A T C C C G A T T G C T A T T t c g a A C C A
    
```





```

P876742 572 CTTc c c a c c c t g AGGTGCTT AGCGT AGCCT CCA GC CAGGG AAG GGG ATG g
P876743 590 CTTGGCC ATC AAAGGTT CTT GCTGC AGGCT GAA GC AGGG G AGA GGA AGG -
P876744 571 CTTGGCC ATC AAAGGTT CTT GCTGC AGCCT GGA GC AGGG G AAA GGA AGG -
*****
*****
*****
*****
*****
***
**
**

alignment position 701 . . . . . 711 . . . . . 721 . . . . . 731 . . . . . 741 . . . . .
P876742 622 a AGTG AG GAC T C A T C T G C C G G G T G G - G A G A T C T C T T G A G G A G A A G A A A A T
P876743 639 - A G T T A G A G C T C G C C C G C T G G G T G G T G G G A C G T C T T G A G A G G A G G A A A C T
P876744 620 - A G T G A G G G C T C G A C T G C C G G G T a G T G G G A C G T C T T G A G A G G A A G A A A C T
*****
*****
*****
*****
*****

alignment position 751 . . . . . 761 . . . . . 771 . . . . . 781 . . . . . 791 . . . . .
P876742 671 ACCg a a a t - - - - - - - - - - - - - - - - - - - C A C A G C A A T G A C C A C T
P876743 688 T G C T C T T G T G C C C T c g a g g c a c C A C C T A T G C G G A C G C A A C G T T G A C C G C T
P876744 669 T C C T C T G G T G C C C T c g g g g - - - C A C C T C T G C G G A C G C A G C G G T G A C C G C G
*****
*****
*****
*****
*****

alignment position 801 . . . . . 811 . . . . . 821 . . . . . 831 . . . . . 841 . . . . .
P876742 695 G T A G T C T A G G G G T C C A G A T G T T T A C c c g a a g g t a t a t t t c a - - - - -
P876743 738 A T A G C C T A A A G G C C C A A G T G T T T A C g t g C T G G C T G G T G T C C C C A G C T C G T
P876744 716 G T A G C C C A G - G G C C C A A G T G T T T A C a a c C T G G C T G G T C T C C C T G C T C G T
*****
*****
*****
*****
*****

alignment position 851 . . . . . 861 . . . . . 871 . . . . . 881 . . . . . 891 . . . . .
P876742 736 - - - - - - - - - - - - - - - - - - - - - - - - - - - - - - - - - - - - - - - - - - - - - - - -
P876743 788 A C T T T C C G C T T C T G C A C T G T G G T T G T G A C C C C G G G C T A A T A T G A A A A C A A
P876744 765 A C T T T T C G C T T C T G G A C T G T G G T T G T G A C A C C G G G C T A A T G T G A A A A C A A
*****
*****
*****
*****
*****

alignment position 901 . . . . . 911 . . . . . 921 . . . . . 931 . . . . . 941 . . . . .
P876742 736 - - - - - - - - - - - - - - - - - - - - - - - - - - - - - - - - - - - - - - - - - - - - - - - -
P876743 838 A C T C C T A T t t g a G T G T G G A T G G A A G G A G T C C G T T T G A T A a t T T G T T C T G A
P876744 815 A C T C C T A T c c g t G T G T G G A T G G A A G G A A T C T G T T T G A T A g - T T G T T T T T A
*****
*****
*****
*****
*****

alignment position 951 . . . . . 961 . . . . . 971 . . . . . 981 . . . . . 991 . . . . .
P876742 736 - - - C T T G C T G - - T G a g c t g a c g a g t t g a g g g a a t a a t c a g a a a g a g a g c
P876743 888 G T G G C T T G C T G - - T G T - - - - - - - - - - - - - - - - - - - - - - - - - - - - - -
P876744 864 G T G G C T T G C T a t a T G T - - - - - - - - - - - - - - - - - - - - - - - - - - - - - -
*****
*****

alignment position 1001 . . . . . 1011 . . . . . 1021 . . . . . 1031 . . . . . 1041 . . . . .
P876742 780 t c c c t c t g g a a g t c g c a g t c c t g a t g a g g c t a a t c c a c a t a g c A G T T C T G
P876743 902 - - - - - - - - - - - - - - - - - - - - - - - - - - - - - - - - - - - - - - - - - - - - - - - -
P876744 880 - - - - - - - - - - - - - - - - - - - - - - - - - - - - - - - - - - - - - - - - - - - - - - - -
*****

alignment position 1051 . . . . . 1061 . . . . . 1071 . . . . . 1081 . . . . . 1091 . . . . .

```
